# Supplementary material for: Proteomic Analysis of the Increased Stress Tolerance of Saccharomyces cerevisiae Encapsulated in Liquid Core Alginate-Chitosan Capsules
Source: PLoS One. 2012 Nov 9;7(11):e49335. doi: 10.1371/journal.pone.0049335 (PMC3494678; doi:10.1371/journal.pone.0049335)
Supplement: Table S1 — Proteins identified by the nLC-MS/MS approach. (XLSX) [file pone.0049335.s006.xlsx]

## Sheet: Proteins identified by nLC-MSMS
Accession	Corresponding Gene ID	Protein	Description	Protein coverage	# Peptides identified	Fold change	p-value from t-test	Benjamini-Hochberg adjusted p values
P19097	YPL231W	Fas2p	Fatty acid synthase subunit alpha OS=Saccharomyces cerevisiae GN=FAS2 PE=1 SV=2 - [FAS2_YEAST]	11.98	17	1.66509	3.88412e-06	0.00152612
P17649	YGR019W	Uga1p	4-aminobutyrate aminotransferase OS=Saccharomyces cerevisiae GN=UGA1 PE=1 SV=2 - [GATA_YEAST]	2.12	1	2.40994	6.45654e-06	0.00152612
P00360	YJL052W	Tdh1p	Glyceraldehyde-3-phosphate dehydrogenase 1 OS=Saccharomyces cerevisiae GN=TDH1 PE=1 SV=3 - [G3P1_YEAST]	59.94	23	3.32906	1.07673e-05	0.00152612
Q04409	YDR516C	Emi2p	Putative glucokinase-2 OS=Saccharomyces cerevisiae GN=EMI2 PE=1 SV=1 - [EMI2_YEAST]	15.6	8	2.15077	1.09028e-05	0.00152612
P32775	YEL011W	Glc3p	1,4-alpha-glucan-branching enzyme OS=Saccharomyces cerevisiae GN=GLC3 PE=1 SV=2 - [GLGB_YEAST]	1.7	1	2.75974	1.17654e-05	0.00152612
P23337	YFR015C	Gsy1p	Glycogen [starch] synthase isoform 1 OS=Saccharomyces cerevisiae GN=GSY1 PE=1 SV=3 - [GYS1_YEAST]	3.53	2	5.6147	1.26574e-05	0.00152612
P39004	YDR342C	Hxt7p	High-affinity hexose transporter HXT6 OS=Saccharomyces cerevisiae GN=HXT7 PE=1 SV=1 - [HXT7_YEAST]	3.16	1	13.0391	1.28973e-05	0.00152612
P53757	YNR071C	Ynr071Cp	Uncharacterized isomerase YNR071C OS=Saccharomyces cerevisiae GN=YNR071C PE=1 SV=1 - [YN9A_YEAST]	4.97	2	3.57418	1.45133e-05	0.00152612
P33317	YBR252W	Dut1p	Deoxyuridine 5'-triphosphate nucleotidohydrolase OS=Saccharomyces cerevisiae GN=DUT1 PE=1 SV=2 - [DUT_YEAST]	6.12	1	0.801229	2.13013e-05	0.00186082
P38788	YHR064C	Ssz1p	Ribosome-associated complex subunit SSZ1 OS=Saccharomyces cerevisiae GN=SSZ1 PE=1 SV=2 - [SSZ1_YEAST]	4.46	2	0.669973	2.20872e-05	0.00186082
P02992	YOR187W	Tuf1p	Elongation factor Tu, mitochondrial OS=Saccharomyces cerevisiae GN=TUF1 PE=1 SV=1 - [EFTU_YEAST]	14.42	4	1.21645	2.83491e-05	0.00216624
P39003	YDR343C	Hxt6p	High-affinity hexose transporter HXT6 OS=Saccharomyces cerevisiae GN=HXT6 PE=1 SV=2 - [HXT6_YEAST]	3.33	2	10.6343	3.16456e-05	0.00221727
P00359	YGR192C	Tdh3p	Glyceraldehyde-3-phosphate dehydrogenase 3 OS=Saccharomyces cerevisiae GN=TDH3 PE=1 SV=3 - [G3P3_YEAST]	63.86	27	0.785744	4.14767e-05	0.00268792
P39101	YER048C	Caj1p	Protein CAJ1 OS=Saccharomyces cerevisiae GN=CAJ1 PE=1 SV=1 - [CAJ1_YEAST]	7.16	2	0.529471	5.11265e-05	0.0030733
Q03195	YDR091C	Rli1p	Translation initiation factor RLI1 OS=Saccharomyces cerevisiae GN=RLI1 PE=1 SV=1 - [RLI1_YEAST]	1.48	1	1.36571	6.20106e-05	0.00348027
P53045	YGR060W	Erg25p	C-4 methylsterol oxidase OS=Saccharomyces cerevisiae GN=ERG25 PE=1 SV=1 - [ERG25_YEAST]	2.59	1	3.28173	7.48438e-05	0.00352754
P04806	YFR053C	Hxk1p	Hexokinase-1 OS=Saccharomyces cerevisiae GN=HXK1 PE=1 SV=2 - [HXKA_YEAST]	29.9	13	3.60036	7.50301e-05	0.00352754
P41807	YPR036W	Vma13p	V-type proton ATPase subunit H OS=Saccharomyces cerevisiae GN=VMA13 PE=1 SV=1 - [VATH_YEAST]	5.65	2	1.68941	7.75382e-05	0.00352754
P32796	YML042W	Cat2p	Carnitine O-acetyltransferase, mitochondrial OS=Saccharomyces cerevisiae GN=CAT2 PE=1 SV=2 - [CACP_YEAST]	2.54	2	3.19937	7.96195e-05	0.00352754
A6ZL22	YBR078W	Ecm33p	Cell wall protein ECM33 OS=Saccharomyces cerevisiae (strain YJM789) GN=ECM33 PE=3 SV=2 - [ECM33_YEAS7]	2.56	1	0.546115	9.78145e-05	0.00384214
P11353	YDR044W	Hem13p	Coproporphyrinogen-III oxidase OS=Saccharomyces cerevisiae GN=HEM13 PE=1 SV=2 - [HEM6_YEAST]	28.96	7	2.90558	9.96619e-05	0.00384214
P38429	YMR263W	Sap30p	Transcriptional regulatory protein SAP30 OS=Saccharomyces cerevisiae GN=SAP30 PE=1 SV=2 - [SAP30_YEAST]	6.47	1	0.550102	0.000101409	0.00384214
Q04336	YMR196W	Ymr196Wp	Uncharacterized protein YMR196W OS=Saccharomyces cerevisiae GN=YMR196W PE=1 SV=1 - [YM54_YEAST]	2.85	3	1.84266	0.000109253	0.00384214
P39076	YIL142W	Cct2p	T-complex protein 1 subunit beta OS=Saccharomyces cerevisiae GN=CCT2 PE=1 SV=1 - [TCPB_YEAST]	3.98	2	0.238935	0.000111146	0.00384214
P22768	YOL058W	Arg1p	Argininosuccinate synthase OS=Saccharomyces cerevisiae GN=ARG1 PE=1 SV=2 - [ASSY_YEAST]	8.81	5	1.70507	0.000118436	0.00384214
P31539	YLL026W	Hsp104p	Heat shock protein 104 OS=Saccharomyces cerevisiae GN=HSP104 PE=1 SV=2 - [HS104_YEAST]	7.05	6	1.73535	0.000118641	0.00384214
P39941	YNR073C	Dsf1p	Mannitol dehydrogenase DSF1 OS=Saccharomyces cerevisiae GN=DSF1 PE=1 SV=1 - [DSF1_YEAST]	7.17	3	4.49286	0.000131574	0.00395737
P38344	YBR267W	Rei1p	Pre-60S factor REI1 OS=Saccharomyces cerevisiae GN=REI1 PE=1 SV=2 - [REI1_YEAST]	3.56	1	0.548283	0.000131599	0.00395737
P07283	YFL045C	Sec53p	Phosphomannomutase OS=Saccharomyces cerevisiae GN=SEC53 PE=1 SV=1 - [PMM_YEAST]	29.13	7	0.641298	0.000139391	0.00404715
P05740	YKL180W	Rpl17Ap	60S ribosomal protein L17-A OS=Saccharomyces cerevisiae GN=RPL17A PE=1 SV=4 - [RL17A_YEAST]	29.89	4	0.718818	0.000164345	0.00422971
P46680	YMR092C	Aip1p	Actin-interacting protein 1 OS=Saccharomyces cerevisiae GN=AIP1 PE=1 SV=1 - [AIP1_YEAST]	1.14	1	1.78065	0.000168711	0.00422971
P27472	YLR258W	Gsy2p	Glycogen [starch] synthase isoform 2 OS=Saccharomyces cerevisiae GN=GSY2 PE=1 SV=3 - [GYS2_YEAST]	10.21	5	4.00529	0.000171365	0.00422971
P07149	YKL182W	Fas1p	Fatty acid synthase subunit beta OS=Saccharomyces cerevisiae GN=FAS1 PE=1 SV=2 - [FAS1_YEAST]	11.65	18	1.82792	0.000179958	0.00422971
Q08245	YOL109W	Zeo1p	Protein ZEO1 OS=Saccharomyces cerevisiae GN=ZEO1 PE=1 SV=3 - [ZEO1_YEAST]	15.04	2	0.412369	0.000180916	0.00422971
P10591	YAL005C	Ssa1p	Heat shock protein SSA1 OS=Saccharomyces cerevisiae GN=SSA1 PE=1 SV=4 - [HSP71_YEAST]	23.36	13	1.32316	0.000183305	0.00422971
P32861	YKL035W	Ugp1p	UTP--glucose-1-phosphate uridylyltransferase OS=Saccharomyces cerevisiae GN=UGP1 PE=1 SV=1 - [UGPA1_YEAST]	7.21	3	2.38809	0.000185443	0.00422971
P17555	YNL138W	Srv2p	Adenylyl cyclase-associated protein OS=Saccharomyces cerevisiae GN=SRV2 PE=1 SV=1 - [CAP_YEAST]	5.7	2	0.576543	0.000185866	0.00422971
P02406	YGL103W	Rpl28p	60S ribosomal protein L28 OS=Saccharomyces cerevisiae GN=RPL28 PE=1 SV=3 - [RL28_YEAST]	43.62	7	0.786544	0.000197248	0.0043706
P38081	YBR056W	Ybr056Wp	Uncharacterized glycosyl hydrolase YBR056W OS=Saccharomyces cerevisiae GN=YBR056W PE=1 SV=1 - [YBQ6_YEAST]	5.59	3	1.3368	0.000202554	0.00437309
P14306	YLR178C	Tfs1p	Carboxypeptidase Y inhibitor OS=Saccharomyces cerevisiae GN=TFS1 PE=1 SV=2 - [CPYI_YEAST]	8.22	1	2.58648	0.00021364	0.00449712
Q08981	YPL267W	Acm1p	APC/C-CDH1 modulator 1 OS=Saccharomyces cerevisiae GN=ACM1 PE=1 SV=1 - [ACM1_YEAST]	4.31	1	0.644641	0.000222578	0.00454594
P33322	YLR175W	Cbf5p	H/ACA ribonucleoprotein complex subunit 4 OS=Saccharomyces cerevisiae GN=CBF5 PE=1 SV=1 - [CBF5_YEAST]	6.21	4	0.487629	0.000226757	0.00454594
P33333	YDL052C	Slc1p	Probable 1-acyl-sn-glycerol-3-phosphate acyltransferase OS=Saccharomyces cerevisiae GN=SLC1 PE=1 SV=1 - [PLSC_YEAST]	6.6	2	1.43258	0.000233426	0.00454804
P37303	YEL046C	Gly1p	Low specificity L-threonine aldolase OS=Saccharomyces cerevisiae GN=GLY1 PE=1 SV=2 - [GLY1_YEAST]	4.13	1	0.297787	0.000237665	0.00454804
P04161	YDR408C	Ade8p	Phosphoribosylglycinamide formyltransferase OS=Saccharomyces cerevisiae GN=ADE8 PE=1 SV=1 - [PUR3_YEAST]	7.01	1	0.597412	0.000246459	0.00461152
P32356	YDR001C	Nth1p	Neutral trehalase OS=Saccharomyces cerevisiae GN=NTH1 PE=1 SV=3 - [TREA_YEAST]	9.45	5	1.60528	0.00027026	0.00484775
P53235	YGR054W	Ygr054Wp	Eukaryotic translation initiation factor 2A OS=Saccharomyces cerevisiae GN=YGR054W PE=1 SV=1 - [EIF2A_YEAST]	3.27	2	0.710402	0.000270599	0.00484775
P32324	YDR385W	Eft1p	Elongation factor 2 OS=Saccharomyces cerevisiae GN=EFT1 PE=1 SV=1 - [EF2_YEAST]	18.05	11	0.747267	0.000293355	0.00514594
P32353	YLR056W	Erg3p	C-5 sterol desaturase OS=Saccharomyces cerevisiae GN=ERG3 PE=1 SV=1 - [ERG3_YEAST]	2.74	1	2.54601	0.000311295	0.00526329
P40991	YNL061W	Nop2p	Putative ribosomal RNA methyltransferase Nop2 OS=Saccharomyces cerevisiae GN=NOP2 PE=1 SV=1 - [NOP2_YEAST]	2.1	1	0.498875	0.000313855	0.00526329
P22146	YMR307W	Gas1p	1,3-beta-glucanosyltransferase GAS1 OS=Saccharomyces cerevisiae GN=GAS1 PE=1 SV=2 - [GAS1_YEAST]	2.68	1	0.464938	0.000318798	0.00526329
B3LRI4	YER067W	Rgi1p	Respiratory growth induced protein 1 OS=Saccharomyces cerevisiae (strain RM11-1a) GN=RGI1 PE=3 SV=1 - [RGI1_YEAS1]	15.53	2	2.74178	0.000328582	0.0053205
P15705	YOR027W	Sti1p	Heat shock protein STI1 OS=Saccharomyces cerevisiae GN=STI1 PE=1 SV=1 - [STI1_YEAST]	13.92	8	0.626443	0.000335781	0.00533264
P25491	YNL064C	Ydj1p	Mitochondrial protein import protein MAS5 OS=Saccharomyces cerevisiae GN=YDJ1 PE=1 SV=1 - [MAS5_YEAST]	10.51	4	0.449038	0.000341998	0.00533264
P14540	YKL060C	Fba1p	Fructose-bisphosphate aldolase OS=Saccharomyces cerevisiae GN=FBA1 PE=1 SV=3 - [ALF_YEAST]	27.3	10	0.888651	0.000372902	0.00542138
A6ZPB3	YOR276W	Caf20p	Cap-associated protein CAF20 OS=Saccharomyces cerevisiae (strain YJM789) GN=CAF20 PE=3 SV=1 - [CAF20_YEAS7]	19.25	2	0.250041	0.000373587	0.00542138
P54115	YPL061W	Ald6p	Magnesium-activated aldehyde dehydrogenase, cytosolic OS=Saccharomyces cerevisiae GN=ALD6 PE=1 SV=4 - [ALDH6_YEAST]	10.2	5	1.18249	0.000374119	0.00542138
P32563	YOR270C	Vph1p	V-type proton ATPase subunit a, vacuolar isoform OS=Saccharomyces cerevisiae GN=VPH1 PE=1 SV=3 - [VPH1_YEAST]	6.79	5	1.68435	0.00037806	0.00542138
P38205	YBL024W	Ncl1p	tRNA (cytosine-5-)-methyltransferase NCL1 OS=Saccharomyces cerevisiae GN=NCL1 PE=1 SV=1 - [NCL1_YEAST]	1.61	1	0.615424	0.000379883	0.00542138
P27476	YGR159C	Nsr1p	Nuclear localization sequence-binding protein OS=Saccharomyces cerevisiae GN=NSR1 PE=1 SV=1 - [NSR1_YEAST]	15.46	8	0.725871	0.000398918	0.00559815
P47018	YJL123C	Mtc1p	Maintenance of telomere capping protein 1 OS=Saccharomyces cerevisiae GN=MTC1 PE=1 SV=1 - [MTC1_YEAST]	3.97	2	0.566781	0.000477489	0.00659091
P14904	YKL103C	Lap4p	Vacuolar aminopeptidase 1 OS=Saccharomyces cerevisiae GN=LAP4 PE=1 SV=2 - [AMPL_YEAST]	1.36	1	1.73009	0.000517881	0.00685318
P53839	YNL274C	Ynl274Cp	Putative 2-hydroxyacid dehydrogenase YNL274C OS=Saccharomyces cerevisiae GN=YNL274C PE=1 SV=1 - [YN14_YEAST]	4	1	1.2958	0.000522952	0.00685318
P02293	YDR224C	Htb1p	Histone H2B.1 OS=Saccharomyces cerevisiae GN=HTB1 PE=1 SV=2 - [H2B1_YEAST]	29.01	4	0.65887	0.000527264	0.00685318
P40413	YJR064W	Cct5p	T-complex protein 1 subunit epsilon OS=Saccharomyces cerevisiae GN=CCT5 PE=1 SV=3 - [TCPE_YEAST]	1.42	1	0.550367	0.000529046	0.00685318
A6ZRM0	YNL220W	Ade12p	Adenylosuccinate synthetase OS=Saccharomyces cerevisiae (strain YJM789) GN=ADE12 PE=3 SV=1 - [PURA_YEAS7]	11.78	5	1.41846	0.000548832	0.00700177
B3LLM2	YML030W	Aim31p	Altered inheritance of mitochondria protein 31, mitochondrial OS=Saccharomyces cerevisiae (strain RM11-1a) GN=AIM31 PE=3 SV=1 - [AIM31_YEAS1]	3.77	1	1.3821	0.000577227	0.00725411
P32471	YAL003W	Efb1p	Elongation factor 1-beta OS=Saccharomyces cerevisiae GN=EFB1 PE=1 SV=4 - [EF1B_YEAST]	20.39	3	0.703878	0.000626579	0.00771141
P15891	YCR088W	Abp1p	Actin-binding protein OS=Saccharomyces cerevisiae GN=ABP1 PE=1 SV=4 - [ABP1_YEAST]	6.08	2	0.174491	0.000640472	0.00771141
P07265	YBR299W	Mal62p	Alpha-glucosidase MAL62 OS=Saccharomyces cerevisiae GN=MAL62 PE=3 SV=1 - [MAL62_YEAST]	9.25	4	1.34913	0.000641091	0.00771141
P11745	YMR235C	Rna1p	Ran GTPase-activating protein 1 OS=Saccharomyces cerevisiae GN=RNA1 PE=1 SV=2 - [RNA1_YEAST]	4.42	3	0.708997	0.000679795	0.00806179
P05373	YGL040C	Hem2p	Delta-aminolevulinic acid dehydratase OS=Saccharomyces cerevisiae GN=HEM2 PE=1 SV=2 - [HEM2_YEAST]	6.73	2	1.30045	0.000697438	0.00806586
P38088	YBR121C	Grs1p	Glycyl-tRNA synthetase 1 OS=Saccharomyces cerevisiae GN=GRS1 PE=1 SV=1 - [SYG_YEAST]	19.34	9	0.761838	0.000699297	0.00806586
Q12443	YDL204W	Rtn2p	Reticulon-like protein 2 OS=Saccharomyces cerevisiae GN=RTN2 PE=1 SV=1 - [RTN2_YEAST]	3.31	1	9.07004	0.000721404	0.00810121
P31412	YKL080W	Vma5p	V-type proton ATPase subunit C OS=Saccharomyces cerevisiae GN=VMA5 PE=1 SV=4 - [VATC_YEAST]	2.55	1	1.23122	0.000721604	0.00810121
P17709	YCL040W	Glk1p	Glucokinase-1 OS=Saccharomyces cerevisiae GN=GLK1 PE=1 SV=1 - [HXKG_YEAST]	13.8	6	2.83667	0.000777228	0.00828907
P52918	YDR335W	Msn5p	Protein MSN5 OS=Saccharomyces cerevisiae GN=MSN5 PE=1 SV=1 - [MSN5_YEAST]	1.39	1	1.51548	0.000780552	0.00828907
P01120	YNL098C	Ras2p	Ras-like protein 2 OS=Saccharomyces cerevisiae GN=RAS2 PE=1 SV=4 - [RAS2_YEAST]	4.66	1	0.485993	0.00078608	0.00828907
P16467	YLR134W	Pdc5p	Pyruvate decarboxylase isozyme 2 OS=Saccharomyces cerevisiae GN=PDC5 PE=1 SV=4 - [PDC5_YEAST]	6.22	3	0.572688	0.000795167	0.00828907
P08466	YJL208C	Nuc1p	Mitochondrial nuclease OS=Saccharomyces cerevisiae GN=NUC1 PE=1 SV=1 - [NUC1_YEAST]	3.04	1	0.751043	0.000798507	0.00828907
P26570	YML016C	Ppz1p	Serine/threonine-protein phosphatase PP-Z1 OS=Saccharomyces cerevisiae GN=PPZ1 PE=1 SV=5 - [PPZ1_YEAST]	1.45	1	0.858248	0.000804693	0.00828907
P41948	YNL142W	Mep2p	Ammonium transporter MEP2 OS=Saccharomyces cerevisiae GN=MEP2 PE=1 SV=1 - [MEP2_YEAST]	4.81	1	0.289719	0.000807249	0.00828907
P26785	YNL069C	Rpl16Bp	60S ribosomal protein L16-B OS=Saccharomyces cerevisiae GN=RPL16B PE=1 SV=3 - [RL16B_YEAST]	27.78	7	0.732534	0.000825588	0.00835132
A6ZRK4	YNL239W	Lap3p	Cysteine proteinase 1, mitochondrial OS=Saccharomyces cerevisiae (strain YJM789) GN=LAP3 PE=3 SV=2 - [BLH1_YEAS7]	5.8	3	1.64955	0.000833148	0.00835132
P19211	YJR047C	Anb1p	Eukaryotic translation initiation factor 5A-2 OS=Saccharomyces cerevisiae GN=ANB1 PE=1 SV=3 - [IF5A2_YEAST]	19.11	2	2.74294	0.000893302	0.00884894
P12688	YKL126W	Ypk1p	Serine/threonine-protein kinase YPK1 OS=Saccharomyces cerevisiae GN=YPK1 PE=1 SV=2 - [YPK1_YEAST]	2.94	1	1.66935	0.000913004	0.00885385
P00924	YGR254W	Eno1p	Enolase 1 OS=Saccharomyces cerevisiae GN=ENO1 PE=1 SV=3 - [ENO1_YEAST]	54.92	22	1.20819	0.000929379	0.00885385
P02994	YBR118W	Tef1p	Elongation factor 1-alpha OS=Saccharomyces cerevisiae GN=TEF1 PE=1 SV=1 - [EF1A_YEAST]	42.36	17	0.772134	0.000934866	0.00885385
P32264	YDR300C	Pro1p	Glutamate 5-kinase OS=Saccharomyces cerevisiae GN=PRO1 PE=1 SV=2 - [PROB_YEAST]	5.61	1	1.65712	0.000938813	0.00885385
Q06625	YPR184W	Gdb1p	Glycogen debranching enzyme OS=Saccharomyces cerevisiae GN=GDB1 PE=1 SV=1 - [GDE_YEAST]	1.3	2	1.49724	0.000946373	0.00885385
P46681	YDL178W	Dld2p	D-lactate dehydrogenase [cytochrome] 2, mitochondrial OS=Saccharomyces cerevisiae GN=DLD2 PE=1 SV=1 - [DLD2_YEAST]	9.25	2	1.34501	0.000976969	0.00895834
P15992	YBR072W	Hsp26p	Heat shock protein 26 OS=Saccharomyces cerevisiae GN=HSP26 PE=1 SV=3 - [HSP26_YEAST]	23.83	4	3.1099	0.000978821	0.00895834
P38431	YPR041W	Tif5p	Eukaryotic translation initiation factor 5 OS=Saccharomyces cerevisiae GN=TIF5 PE=1 SV=1 - [IF5_YEAST]	7.16	2	0.500071	0.00101585	0.00919727
Q02892	YPL093W	Nog1p	Nucleolar GTP-binding protein 1 OS=Saccharomyces cerevisiae GN=NOG1 PE=1 SV=1 - [NOG1_YEAST]	2.01	1	0.474982	0.00104626	0.00937185
A6ZNU5	YOR095C	Rki1p	Ribose-5-phosphate isomerase OS=Saccharomyces cerevisiae (strain YJM789) GN=RKI1 PE=3 SV=1 - [RPIA_YEAS7]	3.49	1	0.778382	0.00106806	0.00940445
P14020	YPR183W	Dpm1p	Dolichol-phosphate mannosyltransferase OS=Saccharomyces cerevisiae GN=DPM1 PE=1 SV=3 - [DPM1_YEAST]	20.22	3	1.31466	0.00107558	0.00940445
P38009	YMR120C	Ade17p	Bifunctional purine biosynthesis protein ADE17 OS=Saccharomyces cerevisiae GN=ADE17 PE=1 SV=2 - [PUR92_YEAST]	12.16	6	1.26632	0.00108341	0.00940445
P41277	YIL053W	Rhr2p	(DL)-glycerol-3-phosphatase 1 OS=Saccharomyces cerevisiae GN=RHR2 PE=1 SV=3 - [GPP1_YEAST]	29.6	7	0.623783	0.00109723	0.00942725
P37291	YLR058C	Shm2p	Serine hydroxymethyltransferase, cytosolic OS=Saccharomyces cerevisiae GN=SHM2 PE=1 SV=2 - [GLYC_YEAST]	34.12	11	0.794683	0.00112781	0.00959212
P05030	YGL008C	Pma1p	Plasma membrane ATPase 1 OS=Saccharomyces cerevisiae GN=PMA1 PE=1 SV=2 - [PMA1_YEAST]	16.56	13	1.27075	0.00114903	0.00960518
C7GP20	YKL054C	Def1p	RNA polymerase II degradation factor 1 OS=Saccharomyces cerevisiae (strain JAY291) GN=DEF1 PE=3 SV=1 - [DEF1_YEAS2]	7.32	4	1.32838	0.00116208	0.00960518
Q04305	YMR093W	Utp15p	U3 small nucleolar RNA-associated protein 15 OS=Saccharomyces cerevisiae GN=UTP15 PE=1 SV=1 - [UTP15_YEAST]	3.51	1	1.59324	0.00117233	0.00960518
Q04344	YDL125C	Hnt1p	Hit family protein 1 OS=Saccharomyces cerevisiae GN=HNT1 PE=1 SV=2 - [HNT1_YEAST]	10.13	1	1.68227	0.00117498	0.00960518
P05754	YER102W	Rps8Ap	40S ribosomal protein S8 OS=Saccharomyces cerevisiae GN=RPS8A PE=1 SV=3 - [RS8_YEAST]	19.5	5	0.885237	0.00123282	0.00998112
P06244	YJL164C	Tpk1p	cAMP-dependent protein kinase type 1 OS=Saccharomyces cerevisiae GN=TPK1 PE=1 SV=2 - [KAPA_YEAST]	3.78	2	1.70131	0.00126209	0.0101208
P53883	YNL175C	Nop13p	Nucleolar protein 13 OS=Saccharomyces cerevisiae GN=NOP13 PE=1 SV=1 - [NOP13_YEAST]	2.73	2	0.511761	0.00129384	0.0101724
P32629	YEL036C	Anp1p	Mannan polymerase II complex ANP1 subunit OS=Saccharomyces cerevisiae GN=ANP1 PE=1 SV=3 - [ANP1_YEAST]	4	2	0.680277	0.00130029	0.0101724
P38934	YOR198C	Bfr1p	Nuclear segregation protein BFR1 OS=Saccharomyces cerevisiae GN=BFR1 PE=1 SV=1 - [BFR1_YEAST]	13.19	6	0.499824	0.00130477	0.0101724
P30902	YKL016C	Atp7p	ATP synthase subunit d, mitochondrial OS=Saccharomyces cerevisiae GN=ATP7 PE=1 SV=2 - [ATP7_YEAST]	14.94	2	1.79401	0.00132575	0.0102411
P48015	YDR019C	Gcv1p	Aminomethyltransferase, mitochondrial OS=Saccharomyces cerevisiae GN=GCV1 PE=1 SV=2 - [GCST_YEAST]	6.5	3	0.719272	0.00134854	0.0103224
P40150	YNL209W	Ssb2p	Heat shock protein SSB2 OS=Saccharomyces cerevisiae GN=SSB2 PE=1 SV=2 - [HSP76_YEAST]	14.85	6	1.71288	0.001405	0.010572
P50263	YMR175W	Sip18p	Protein SIP18 OS=Saccharomyces cerevisiae GN=SIP18 PE=1 SV=1 - [SIP18_YEAST]	12.66	1	7.7727	0.00141978	0.010572
P11491	YDR481C	Pho8p	Repressible alkaline phosphatase OS=Saccharomyces cerevisiae GN=PHO8 PE=1 SV=2 - [PPB_YEAST]	9.89	5	0.618611	0.00142664	0.010572
P07273	YGL043W	Dst1p	Transcription elongation factor S-II OS=Saccharomyces cerevisiae GN=DST1 PE=1 SV=4 - [TFS2_YEAST]	10.36	2	1.69507	0.00143957	0.010572
P07260	YOL139C	Cdc33p	Eukaryotic translation initiation factor 4E OS=Saccharomyces cerevisiae GN=CDC33 PE=1 SV=1 - [IF4E_YEAST]	15.02	3	0.665988	0.00144392	0.010572
Q12025	YDR056C	Ydr056Cp	Uncharacterized protein YDR056C OS=Saccharomyces cerevisiae GN=YDR056C PE=1 SV=1 - [YD056_YEAST]	6.83	2	2.37382	0.0014985	0.0108316
P38635	YFR025C	His2p	Histidinol-phosphatase OS=Saccharomyces cerevisiae GN=HIS2 PE=1 SV=2 - [HIS9_YEAST]	2.99	1	1.55813	0.0015051	0.0108316
Q05979	YLR231C	Bna5p	Kynureninase OS=Saccharomyces cerevisiae GN=BNA5 PE=1 SV=1 - [KYNU_YEAST]	3.31	1	1.47872	0.00154886	0.0110096
Q04869	YMR315W	Ymr315Wp	Uncharacterized protein YMR315W OS=Saccharomyces cerevisiae GN=YMR315W PE=1 SV=1 - [YM94_YEAST]	4.01	1	1.37024	0.00155599	0.0110096
P07244	YGL234W	Ade5p	Bifunctional purine biosynthetic protein ADE5,7 OS=Saccharomyces cerevisiae GN=ADE5,7 PE=1 SV=1 - [PUR2_YEAST]	10.47	5	0.839135	0.00163434	0.0114676
P32527	YGR285C	Zuo1p	Zuotin OS=Saccharomyces cerevisiae GN=ZUO1 PE=1 SV=1 - [ZUO1_YEAST]	21.02	10	0.745046	0.00168218	0.0115563
P05759	YLR167W	Ubi3p	Ubiquitin-40S ribosomal protein S31 OS=Saccharomyces cerevisiae GN=UBI3 PE=1 SV=3 - [RS27A_YEAST]	36.18	7	0.697625	0.00168305	0.0115563
Q12040	YOR283W	Yor283Wp	Probable phosphoglycerate mutase YOR283W OS=Saccharomyces cerevisiae GN=YOR283W PE=1 SV=1 - [YO283_YEAST]	13.04	3	0.598655	0.00168815	0.0115563
P30665	YPR019W	Cdc54p	Cell division control protein 54 OS=Saccharomyces cerevisiae GN=CDC54 PE=1 SV=2 - [CDC54_YEAST]	4.18	2	1.27223	0.00185861	0.0124764
P39015	YLR150W	Stm1p	Suppressor protein STM1 OS=Saccharomyces cerevisiae GN=STM1 PE=1 SV=3 - [STM1_YEAST]	38.46	8	0.419519	0.00185933	0.0124764
P0C2H6	YHR010W	Rpl27Ap	60S ribosomal protein L27-A OS=Saccharomyces cerevisiae GN=RPL27A PE=1 SV=1 - [RL27A_YEAST]	33.09	3	1.27318	0.00188982	0.0124764
Q06704	YLR309C	Imh1p	Golgin IMH1 OS=Saccharomyces cerevisiae GN=IMH1 PE=1 SV=1 - [IMH1_YEAST]	1.1	1	0.556183	0.00189566	0.0124764
Q07844	YLL034C	Rix7p	Ribosome biogenesis ATPase RIX7 OS=Saccharomyces cerevisiae GN=RIX7 PE=1 SV=1 - [RIX7_YEAST]	1.31	1	1.64832	0.00191614	0.0124764
P06105	YJL080C	Scp160p	Protein SCP160 OS=Saccharomyces cerevisiae GN=SCP160 PE=1 SV=3 - [SC160_YEAST]	11.95	14	0.73746	0.00192342	0.0124764
P32892	YLL008W	Drs1p	ATP-dependent RNA helicase DRS1 OS=Saccharomyces cerevisiae GN=DRS1 PE=1 SV=2 - [DRS1_YEAST]	1.73	1	0.0825451	0.00192629	0.0124764
P32178	YPR060C	Aro7p	Chorismate mutase OS=Saccharomyces cerevisiae GN=ARO7 PE=1 SV=1 - [CHMU_YEAST]	12.89	3	0.705782	0.00198066	0.0127307
Q3E841	YNR034W	Ynr034Wp	Uncharacterized protein YNR034W-A OS=Saccharomyces cerevisiae GN=YNR034W-A PE=1 SV=1 - [YN034_YEAST]	12.24	1	3.3068	0.00200266	0.0127745
P39936	YGL049C	Tif4632p	Eukaryotic initiation factor 4F subunit p130 OS=Saccharomyces cerevisiae GN=TIF4632 PE=1 SV=1 - [IF4F2_YEAST]	3.72	3	0.854961	0.00206311	0.0129657
P32902	YHL004W	Mrp4p	37S ribosomal protein MRP4, mitochondrial OS=Saccharomyces cerevisiae GN=MRP4 PE=1 SV=1 - [RT04_YEAST]	2.54	1	1.33946	0.00207539	0.0129657
P31688	YDR074W	Tps2p	Trehalose-phosphatase OS=Saccharomyces cerevisiae GN=TPS2 PE=1 SV=3 - [TPS2_YEAST]	2.68	2	2.22509	0.00208951	0.0129657
P46672	YGL105W	Arc1p	GU4 nucleic-binding protein 1 OS=Saccharomyces cerevisiae GN=ARC1 PE=1 SV=2 - [G4P1_YEAST]	12.77	4	0.728722	0.00210331	0.0129657
P34216	YBL047C	Ede1p	EH domain-containing and endocytosis protein 1 OS=Saccharomyces cerevisiae GN=EDE1 PE=1 SV=2 - [EDE1_YEAST]	1.81	2	0.615481	0.00212177	0.0129657
P00330	YOL086C	Adh1p	Alcohol dehydrogenase 1 OS=Saccharomyces cerevisiae GN=ADH1 PE=1 SV=5 - [ADH1_YEAST]	41.38	10	1.55579	0.00212502	0.0129657
P53741	YNR051C	Bre5p	UBP3-associated protein BRE5 OS=Saccharomyces cerevisiae GN=BRE5 PE=1 SV=1 - [BRE5_YEAST]	8.54	3	1.72471	0.00216365	0.0130736
P38715	YHR104W	Gre3p	NADPH-dependent aldose reductase GRE3 OS=Saccharomyces cerevisiae GN=GRE3 PE=1 SV=1 - [GRE3_YEAST]	11.01	2	1.45897	0.00217376	0.0130736
P53095	YGL196W	Dsd1p	D-serine dehydratase OS=Saccharomyces cerevisiae GN=DSD1 PE=1 SV=2 - [DSD1_YEAST]	4.44	1	0.15598	0.00223157	0.0133261
P32598	YER133W	Glc7p	Serine/threonine-protein phosphatase PP1-2 OS=Saccharomyces cerevisiae GN=GLC7 PE=1 SV=1 - [PP12_YEAST]	8.01	2	1.58483	0.00230901	0.0136174
Q03102	YML131W	Yml131Wp	Uncharacterized membrane protein YML131W OS=Saccharomyces cerevisiae GN=YML131W PE=1 SV=1 - [YMN1_YEAST]	2.19	1	3.80717	0.00231269	0.0136174
Q12335	YDR032C	Pst2p	Protoplast secreted protein 2 OS=Saccharomyces cerevisiae GN=PST2 PE=1 SV=1 - [PST2_YEAST]	10.61	1	1.85481	0.00235767	0.0137858
Q00955	YNR016C	Fas3p	Acetyl-CoA carboxylase OS=Saccharomyces cerevisiae GN=FAS3 PE=1 SV=2 - [ACAC_YEAST]	7.93	13	1.35795	0.00246489	0.0143133
A6ZWL1	YPL037C	Egd1p	Nascent polypeptide-associated complex subunit beta-1 OS=Saccharomyces cerevisiae (strain YJM789) GN=EGD1 PE=3 SV=1 - [NACB1_YEAS7]	23.57	3	0.303622	0.00256542	0.0147951
P07143	YOR065W	Cyt1p	Cytochrome c1, heme protein, mitochondrial OS=Saccharomyces cerevisiae GN=CYT1 PE=1 SV=1 - [CY1_YEAST]	4.21	1	0.794927	0.00266342	0.0151344
P26782	YIL069C	Rps24Ap	40S ribosomal protein S24 OS=Saccharomyces cerevisiae GN=RPS24A PE=1 SV=3 - [RS24_YEAST]	21.48	3	0.739877	0.00267528	0.0151344
P32288	YPR035W	Gln1p	Glutamine synthetase OS=Saccharomyces cerevisiae GN=GLN1 PE=1 SV=3 - [GLNA_YEAST]	12.7	5	1.55968	0.00267817	0.0151344
Q00764	YBR126C	Tps1p	Alpha,alpha-trehalose-phosphate synthase [UDP-forming] 56 kDa subunit OS=Saccharomyces cerevisiae GN=TPS1 PE=1 SV=2 - [TPS1_YEAST]	12.53	4	1.77337	0.00270423	0.0151542
Q06616	YPR174C	Ypr174Cp	Nuclear envelope protein YPR174C OS=Saccharomyces cerevisiae GN=YPR174C PE=1 SV=1 - [YP174_YEAST]	5.43	1	0.79223	0.00271768	0.0151542
Q05022	YMR229C	Rrp5p	rRNA biogenesis protein RRP5 OS=Saccharomyces cerevisiae GN=RRP5 PE=1 SV=1 - [RRP5_YEAST]	5.32	9	0.898761	0.00282792	0.0156024
P23301	YEL034W	Hyp2p	Eukaryotic translation initiation factor 5A-1 OS=Saccharomyces cerevisiae GN=HYP2 PE=1 SV=3 - [IF5A1_YEAST]	36.94	4	0.653556	0.00283511	0.0156024
P32582	YGR155W	Cys4p	Cystathionine beta-synthase OS=Saccharomyces cerevisiae GN=CYS4 PE=1 SV=1 - [CBS_YEAST]	15.78	6	0.735826	0.00292024	0.0159665
P27351	YJR005W	Apl1p	AP-2 complex subunit beta OS=Saccharomyces cerevisiae GN=APL1 PE=1 SV=2 - [AP2B_YEAST]	1.57	1	0.558665	0.00297037	0.0160515
P47068	YJL020C	Bbc1p	Myosin tail region-interacting protein MTI1 OS=Saccharomyces cerevisiae GN=BBC1 PE=1 SV=2 - [BBC1_YEAST]	2.33	2	0.634983	0.00300697	0.0160515
P07251	YBL099W	Atp1p	ATP synthase subunit alpha, mitochondrial OS=Saccharomyces cerevisiae GN=ATP1 PE=1 SV=4 - [ATPA_YEAST]	5.32	2	1.19995	0.00301591	0.0160515
P39676	YGR234W	Yhb1p	Flavohemoprotein OS=Saccharomyces cerevisiae GN=YHB1 PE=1 SV=2 - [FHP_YEAST]	8.77	2	0.545135	0.00303068	0.0160515
Q08971	YPL225W	Ypl225Wp	UPF0368 protein YPL225W OS=Saccharomyces cerevisiae GN=YPL225W PE=1 SV=1 - [YP225_YEAST]	8.9	2	1.1766	0.0030311	0.0160515
P07267	YPL154C	Pep4p	Saccharopepsin OS=Saccharomyces cerevisiae GN=PEP4 PE=1 SV=1 - [CARP_YEAST]	6.42	3	1.50125	0.00308762	0.0162486
P0C2H9	YLR406C	Rpl31Bp	60S ribosomal protein L31-B OS=Saccharomyces cerevisiae GN=RPL31B PE=1 SV=1 - [RL31B_YEAST]	23.01	5	0.733116	0.00320133	0.0165351
P21147	YGL055W	Ole1p	Acyl-CoA desaturase 1 OS=Saccharomyces cerevisiae GN=OLE1 PE=1 SV=2 - [ACO1_YEAST]	3.33	1	3.8809	0.00320619	0.0165351
A6ZZH2	YKL150W	Mcr1p	NADH-cytochrome b5 reductase 2 OS=Saccharomyces cerevisiae (strain YJM789) GN=MCR1 PE=2 SV=1 - [MCR1_YEAS7]	12.25	3	1.57582	0.00322379	0.0165351
Q04491	YLR208W	Sec13p	Protein transport protein SEC13 OS=Saccharomyces cerevisiae GN=SEC13 PE=1 SV=1 - [SEC13_YEAST]	7.41	2	1.37711	0.00323917	0.0165351
P38295	YBR177C	Eht1p	Medium-chain fatty acid ethyl ester synthase/esterase 2 OS=Saccharomyces cerevisiae GN=EHT1 PE=1 SV=1 - [MCFS2_YEAST]	6.43	2	0.670475	0.00324024	0.0165351
P54003	YML052W	Sur7p	Protein SUR7 OS=Saccharomyces cerevisiae GN=SUR7 PE=1 SV=1 - [SUR7_YEAST]	2.65	1	0.760072	0.0034279	0.0173873
P40471	YIL124W	Ayr1p	NADPH-dependent 1-acyldihydroxyacetone phosphate reductase OS=Saccharomyces cerevisiae GN=AYR1 PE=1 SV=1 - [AYR1_YEAST]	10.44	3	1.43345	0.00348954	0.017594
P06738	YPR160W	Gph1p	Glycogen phosphorylase OS=Saccharomyces cerevisiae GN=GPH1 PE=1 SV=4 - [PHSG_YEAST]	7.65	5	2.21284	0.00357244	0.0179047
P31334	YGR220C	Mrpl9p	54S ribosomal protein L9, mitochondrial OS=Saccharomyces cerevisiae GN=MRPL9 PE=1 SV=3 - [RM09_YEAST]	4.83	1	1.52369	0.00364844	0.0181774
P15496	YPL117C	Idi1p	Isopentenyl-diphosphate Delta-isomerase OS=Saccharomyces cerevisiae GN=IDI1 PE=1 SV=2 - [IDI1_YEAST]	4.86	1	0.41174	0.0037339	0.0184938
A6ZS33	SCY_4744	Scy_4744p	Leukotriene A-4 hydrolase OS=Saccharomyces cerevisiae (strain YJM789) GN=SCY_4744 PE=3 SV=1 - [LKHA4_YEAS7]	3.87	2	1.87954	0.00380657	0.0186663
P21827	YGL097W	Prp20p	Regulator of chromosome condensation OS=Saccharomyces cerevisiae GN=PRP20 PE=1 SV=1 - [RCC1_YEAST]	8.09	3	0.74958	0.00381306	0.0186663
P16140	YBR127C	Vma2p	V-type proton ATPase subunit B OS=Saccharomyces cerevisiae GN=VMA2 PE=1 SV=2 - [VATB_YEAST]	5.42	2	1.40624	0.00401675	0.0194339
P12398	YJR045C	Ssc1p	Heat shock protein SSC1, mitochondrial OS=Saccharomyces cerevisiae GN=SSC1 PE=1 SV=1 - [HSP77_YEAST]	8.72	5	0.8519	0.00402911	0.0194339
P24000	YGR148C	Rpl24Bp	60S ribosomal protein L24-B OS=Saccharomyces cerevisiae GN=RPL24B PE=1 SV=1 - [RL24B_YEAST]	19.35	4	0.807107	0.00403911	0.0194339
P22141	YER012W	Pre1p	Proteasome component C11 OS=Saccharomyces cerevisiae GN=PRE1 PE=1 SV=2 - [PSB2_YEAST]	10.61	2	1.1836	0.0041335	0.0195456
P16862	YMR205C	Pfk2p	6-phosphofructokinase subunit beta OS=Saccharomyces cerevisiae GN=PFK2 PE=1 SV=4 - [K6PF2_YEAST]	11.78	12	0.886945	0.00413793	0.0195456
P12904	YGL115W	Snf4p	Nuclear protein SNF4 OS=Saccharomyces cerevisiae GN=SNF4 PE=1 SV=1 - [SNF4_YEAST]	4.04	1	1.26157	0.00414525	0.0195456
P0C0V8	YKR057W	Rps21Ap	40S ribosomal protein S21-A OS=Saccharomyces cerevisiae GN=RPS21A PE=1 SV=1 - [RS21A_YEAST]	27.59	2	0.735252	0.00415518	0.0195456
P33416	YDR258C	Hsp78p	Heat shock protein 78, mitochondrial OS=Saccharomyces cerevisiae GN=HSP78 PE=1 SV=2 - [HSP78_YEAST]	5.55	4	1.39344	0.00420464	0.0196684
P41816	YPL171C	Oye3p	NADPH dehydrogenase 3 OS=Saccharomyces cerevisiae GN=OYE3 PE=1 SV=2 - [OYE3_YEAST]	11	4	1.9503	0.00429833	0.0199955
P00445	YJR104C	Sod1p	Superoxide dismutase [Cu-Zn] OS=Saccharomyces cerevisiae GN=SOD1 PE=1 SV=2 - [SODC_YEAST]	26.62	4	0.593882	0.00437451	0.020119
A6ZP10	YOR165W	Sey1p	Protein SEY1 OS=Saccharomyces cerevisiae (strain YJM789) GN=SEY1 PE=3 SV=1 - [SEY1_YEAS7]	3.22	2	1.18712	0.00438415	0.020119
P35191	YFL016C	Mdj1p	DnaJ homolog 1, mitochondrial OS=Saccharomyces cerevisiae GN=MDJ1 PE=1 SV=1 - [MDJ1_YEAST]	7.63	2	1.31142	0.00439655	0.020119
Q02046	YKR080W	Mtd1p	Methylenetetrahydrofolate dehydrogenase [NAD+] OS=Saccharomyces cerevisiae GN=MTD1 PE=1 SV=1 - [MTD1_YEAST]	12.19	6	0.784125	0.00444621	0.0202363
P06245	YPL203W	Tpk2p	cAMP-dependent protein kinase type 2 OS=Saccharomyces cerevisiae GN=TPK2 PE=1 SV=2 - [KAPB_YEAST]	5.53	2	2.1839	0.00454804	0.0205884
P39954	YER043C	Sah1p	Adenosylhomocysteinase OS=Saccharomyces cerevisiae GN=SAH1 PE=1 SV=1 - [SAHH_YEAST]	26.95	11	1.16169	0.00460398	0.0207302
P05753	YHR203C	Rps4Ap	40S ribosomal protein S4 OS=Saccharomyces cerevisiae GN=RPS4A PE=1 SV=3 - [RS4_YEAST]	37.16	14	0.846018	0.00468731	0.0209845
Q12123	YOR173W	Dcs2p	Protein DCS2 OS=Saccharomyces cerevisiae GN=DCS2 PE=1 SV=3 - [DCS2_YEAST]	5.1	2	1.40255	0.0047103	0.0209845
P33297	YOR117W	Rpt5p	26S protease regulatory subunit 6A OS=Saccharomyces cerevisiae GN=RPT5 PE=1 SV=3 - [PRS6A_YEAST]	5.99	2	1.63021	0.0047829	0.0211958
P38113	YBR145W	Adh5p	Alcohol dehydrogenase 5 OS=Saccharomyces cerevisiae GN=ADH5 PE=1 SV=1 - [ADH5_YEAST]	4.84	1	1.86951	0.00493602	0.0217599
P05735	YBR084C-A	Rpl19Ap	60S ribosomal protein L19 OS=Saccharomyces cerevisiae GN=RPL19A PE=1 SV=5 - [RL19_YEAST]	43.92	12	0.756457	0.00499312	0.0218389
P04802	YLL018C	Dps1p	Aspartyl-tRNA synthetase, cytoplasmic OS=Saccharomyces cerevisiae GN=DPS1 PE=1 SV=3 - [SYDC_YEAST]	18.85	7	1.15603	0.00500582	0.0218389
Q06523	YPR148C	Ypr148Cp	Uncharacterized protein YPR148C OS=Saccharomyces cerevisiae GN=YPR148C PE=1 SV=1 - [YP148_YEAST]	2.53	1	0.541984	0.00519433	0.0224358
Q06151	YLR270W	Dcs1p	Scavenger mRNA-decapping enzyme DcpS OS=Saccharomyces cerevisiae GN=DCS1 PE=1 SV=1 - [DCPS_YEAST]	3.14	1	1.42122	0.00520366	0.0224358
P10614	YHR007C	Erg11p	Lanosterol 14-alpha demethylase OS=Saccharomyces cerevisiae GN=ERG11 PE=1 SV=1 - [CP51_YEAST]	1.89	1	1.33902	0.00524507	0.0224358
P25087	YML008C	Erg6p	Sterol 24-C-methyltransferase OS=Saccharomyces cerevisiae GN=ERG6 PE=1 SV=4 - [ERG6_YEAST]	13.84	4	1.29427	0.00524923	0.0224358
P38075	YBR035C	Pdx3p	Pyridoxamine 5'-phosphate oxidase OS=Saccharomyces cerevisiae GN=PDX3 PE=1 SV=1 - [PDX3_YEAST]	9.21	2	1.48205	0.00529537	0.0225187
P40075	YER120W	Scs2p	Vesicle-associated membrane protein-associated protein SCS2 OS=Saccharomyces cerevisiae GN=SCS2 PE=1 SV=3 - [SCS2_YEAST]	3.28	1	0.647567	0.00533225	0.0225616
P48562	YNL298W	Cla4p	Serine/threonine-protein kinase CLA4 OS=Saccharomyces cerevisiae GN=CLA4 PE=1 SV=1 - [CLA4_YEAST]	1.9	1	0.567124	0.00538048	0.0226518
P28777	YGL148W	Aro2p	Chorismate synthase OS=Saccharomyces cerevisiae GN=ARO2 PE=1 SV=1 - [AROC_YEAST]	3.46	2	0.750324	0.00545643	0.0228573
P19882	YLR259C	Hsp60p	Heat shock protein 60, mitochondrial OS=Saccharomyces cerevisiae GN=HSP60 PE=1 SV=1 - [HSP60_YEAST]	3.67	3	0.829819	0.00577954	0.0240284
P38720	YHR183W	Gnd1p	6-phosphogluconate dehydrogenase, decarboxylating 1 OS=Saccharomyces cerevisiae GN=GND1 PE=1 SV=1 - [6PGD1_YEAST]	26.79	11	1.3221	0.00579306	0.0240284
Q12680	YDL171C	Glt1p	Glutamate synthase [NADH] OS=Saccharomyces cerevisiae GN=GLT1 PE=1 SV=2 - [GLT1_YEAST]	5.13	9	1.12914	0.00593415	0.024415
P32316	YBL015W	Ach1p	Acetyl-CoA hydrolase OS=Saccharomyces cerevisiae GN=ACH1 PE=1 SV=2 - [ACH1_YEAST]	5.89	3	1.56185	0.00595813	0.024415
P07256	YBL045C	Cor1p	Cytochrome b-c1 complex subunit 1, mitochondrial OS=Saccharomyces cerevisiae GN=COR1 PE=1 SV=1 - [QCR1_YEAST]	5.03	2	0.86089	0.00597327	0.024415
P38427	YML100W	Tsl1p	Trehalose synthase complex regulatory subunit TSL1 OS=Saccharomyces cerevisiae GN=TSL1 PE=1 SV=1 - [TSL1_YEAST]	2.73	2	1.74821	0.00617178	0.0251045
P38627	YJR103W	Ura8p	CTP synthase 2 OS=Saccharomyces cerevisiae GN=URA8 PE=1 SV=3 - [URA8_YEAST]	6.74	3	1.73617	0.00626301	0.0253532
P40106	YER062C	Hor2p	(DL)-glycerol-3-phosphatase 2 OS=Saccharomyces cerevisiae GN=HOR2 PE=1 SV=1 - [GPP2_YEAST]	19.2	4	1.26552	0.00664086	0.0267541
P41057	YLR388W	Rps29Ap	40S ribosomal protein S29-A OS=Saccharomyces cerevisiae GN=RPS29A PE=1 SV=3 - [RS29A_YEAST]	69.64	4	0.842684	0.00675512	0.0270848
P46367	YOR374W	Ald4p	Potassium-activated aldehyde dehydrogenase, mitochondrial OS=Saccharomyces cerevisiae GN=ALD4 PE=1 SV=2 - [ALDH4_YEAST]	2.12	1	1.67314	0.00687612	0.0274393
P36088	YKL069W	Ykl069Wp	Free methionine-R-sulfoxide reductase OS=Saccharomyces cerevisiae GN=YKL069W PE=1 SV=1 - [FRMSR_YEAST]	12.22	1	0.508151	0.00717146	0.0284829
P32864	YOR370C	Mrs6p	Rab proteins geranylgeranyltransferase component A OS=Saccharomyces cerevisiae GN=MRS6 PE=1 SV=2 - [RAEP_YEAST]	1.82	1	1.76276	0.0075878	0.029995
P60010	YFL039C	Act1p	Actin OS=Saccharomyces cerevisiae GN=ACT1 PE=1 SV=1 - [ACT_YEAST]	22.4	7	1.13471	0.00788264	0.0310149
P47096	YJR025C	Bna1p	3-hydroxyanthranilate 3,4-dioxygenase OS=Saccharomyces cerevisiae GN=BNA1 PE=1 SV=1 - [3HAO_YEAST]	7.34	2	1.10042	0.00806834	0.0315979
P32799	YGL191W	Cox13p	Cytochrome c oxidase subunit 6A, mitochondrial OS=Saccharomyces cerevisiae GN=COX13 PE=1 SV=1 - [COX13_YEAST]	29.46	3	0.667572	0.00817581	0.0318705
P47143	YJR105W	Ado1p	Adenosine kinase OS=Saccharomyces cerevisiae GN=ADO1 PE=1 SV=1 - [ADK_YEAST]	18.82	5	0.852086	0.00836533	0.032459
P09950	YDR232W	Hem1p	5-aminolevulinate synthase, mitochondrial OS=Saccharomyces cerevisiae GN=HEM1 PE=1 SV=1 - [HEM1_YEAST]	8.58	3	1.20444	0.00847574	0.0326752
P16603	YHR042W	Ncp1p	NADPH--cytochrome P450 reductase OS=Saccharomyces cerevisiae GN=NCP1 PE=1 SV=3 - [NCPR_YEAST]	4.78	3	1.26389	0.00849867	0.0326752
P23180	YHL021C	Aim17p	Probable oxidoreductase AIM17 OS=Saccharomyces cerevisiae GN=AIM17 PE=1 SV=2 - [AIM17_YEAST]	10.97	3	4.76373	0.00856791	0.0327917
P37297	YLR305C	Stt4p	Phosphatidylinositol 4-kinase STT4 OS=Saccharomyces cerevisiae GN=STT4 PE=1 SV=1 - [STT4_YEAST]	0.63	1	1.62313	0.00883196	0.0334988
P53301	YGR189C	Crh1p	Probable glycosidase CRH1 OS=Saccharomyces cerevisiae GN=CRH1 PE=1 SV=1 - [CRH1_YEAST]	6.71	3	0.756039	0.00883224	0.0334988
Q08421	YOR051C	Yor051Cp	Uncharacterized protein YOR051C OS=Saccharomyces cerevisiae GN=YOR051C PE=1 SV=1 - [YO051_YEAST]	7.77	3	0.531656	0.00899788	0.0336885
P40091	YER149C	Pea2p	Protein PEA2 OS=Saccharomyces cerevisiae GN=PEA2 PE=1 SV=1 - [PEA2_YEAST]	3.33	1	0.169028	0.00901021	0.0336885
P53686	YPL015C	Hst2p	NAD-dependent deacetylase HST2 OS=Saccharomyces cerevisiae GN=HST2 PE=1 SV=1 - [HST2_YEAST]	1.68	1	0.784824	0.00903547	0.0336885
P00942	YDR050C	Tpi1p	Triosephosphate isomerase OS=Saccharomyces cerevisiae GN=TPI1 PE=1 SV=2 - [TPIS_YEAST]	51.61	10	1.08232	0.00904228	0.0336885
P22943	YFL014W	Hsp12p	12 kDa heat shock protein OS=Saccharomyces cerevisiae GN=HSP12 PE=1 SV=1 - [HSP12_YEAST]	15.6	1	1.9908	0.00933962	0.0345568
P15180	YDR037W	Krs1p	Lysyl-tRNA synthetase, cytoplasmic OS=Saccharomyces cerevisiae GN=KRS1 PE=1 SV=2 - [SYKC_YEAST]	14.72	7	0.818871	0.00941455	0.0345568
A6ZYX9	SCY_1267	Scy_1267p	Succinate dehydrogenase assembly factor 1 homolog, mitochondrial OS=Saccharomyces cerevisiae (strain YJM789) GN=SCY_1267 PE=3 SV=1 - [SDHF1_YEAS7]	13.92	1	1.78974	0.00944007	0.0345568
P33760	YNL329C	Pex6p	Peroxisomal ATPase PEX6 OS=Saccharomyces cerevisiae GN=PEX6 PE=1 SV=1 - [PEX6_YEAST]	1.26	1	1.53018	0.00949431	0.0345568
P04147	YER165W	Pab1p	Polyadenylate-binding protein, cytoplasmic and nuclear OS=Saccharomyces cerevisiae GN=PAB1 PE=1 SV=4 - [PABP_YEAST]	13.52	8	0.629594	0.00950849	0.0345568
P04076	YHR018C	Arg4p	Argininosuccinate lyase OS=Saccharomyces cerevisiae GN=ARG4 PE=1 SV=2 - [ARLY_YEAST]	12.31	6	1.17626	0.0095281	0.0345568
Q08412	YOR042W	Cue5p	Ubiquitin-binding protein CUE5 OS=Saccharomyces cerevisiae GN=CUE5 PE=1 SV=1 - [CUE5_YEAST]	2.19	1	0.478335	0.00956263	0.0345568
P54839	YML126C	Erg13p	Hydroxymethylglutaryl-CoA synthase OS=Saccharomyces cerevisiae GN=ERG13 PE=1 SV=1 - [HMCS_YEAST]	2.24	1	1.92812	0.00967698	0.0347225
P34167	YPR163C	Tif3p	Eukaryotic translation initiation factor 4B OS=Saccharomyces cerevisiae GN=TIF3 PE=1 SV=1 - [IF4B_YEAST]	27.06	7	0.633591	0.00969095	0.0347225
P43585	YFL004W	Vtc2p	Vacuolar transporter chaperone 2 OS=Saccharomyces cerevisiae GN=VTC2 PE=1 SV=1 - [VTC2_YEAST]	6.64	3	0.684371	0.00977512	0.0348756
P32451	YGR286C	Bio2p	Biotin synthase, mitochondrial OS=Saccharomyces cerevisiae GN=BIO2 PE=1 SV=2 - [BIOB_YEAST]	5.07	1	1.6094	0.00983233	0.0349318
P40069	YER110C	Kap123p	Importin subunit beta-4 OS=Saccharomyces cerevisiae GN=KAP123 PE=1 SV=1 - [IMB4_YEAST]	3.77	4	0.776268	0.0101642	0.0359592
P32366	YLR447C	Vma6p	V-type proton ATPase subunit d OS=Saccharomyces cerevisiae GN=VMA6 PE=1 SV=2 - [VA0D_YEAST]	2.61	1	1.77581	0.0104924	0.0369649
P27614	YJL172W	Cps1p	Carboxypeptidase S OS=Saccharomyces cerevisiae GN=CPS1 PE=1 SV=2 - [CBPS_YEAST]	9.38	5	0.878314	0.0105587	0.0370433
Q08977	YPL260W	Ypl260Wp	UPF0662 protein YPL260W OS=Saccharomyces cerevisiae GN=YPL260W PE=1 SV=1 - [YP260_YEAST]	2.9	1	0.631686	0.0107777	0.0375922
P20967	YIL125W	Kgd1p	2-oxoglutarate dehydrogenase, mitochondrial OS=Saccharomyces cerevisiae GN=KGD1 PE=1 SV=2 - [ODO1_YEAST]	4.14	3	1.4492	0.0108044	0.0375922
A6ZPY2	YJR014W	Tma22p	Translation machinery-associated protein 22 OS=Saccharomyces cerevisiae (strain YJM789) GN=TMA22 PE=3 SV=1 - [DENR_YEAS7]	4.55	1	0.66896	0.0110671	0.0382386
P15019	YLR354C	Tal1p	Transaldolase OS=Saccharomyces cerevisiae GN=TAL1 PE=1 SV=4 - [TAL1_YEAST]	23.28	5	1.33806	0.011081	0.0382386
P05694	YER091C	Met6p	5-methyltetrahydropteroyltriglutamate--homocysteine methyltransferase OS=Saccharomyces cerevisiae GN=MET6 PE=1 SV=4 - [METE_YEAST]	27.51	18	0.859289	0.0111344	0.038266
P15790	YIL035C	Cka1p	Casein kinase II subunit alpha OS=Saccharomyces cerevisiae GN=CKA1 PE=1 SV=1 - [CSK21_YEAST]	3.23	1	1.73741	0.011193	0.0383109
Q04636	YML069W	Pob3p	FACT complex subunit POB3 OS=Saccharomyces cerevisiae GN=POB3 PE=1 SV=1 - [POB3_YEAST]	3.44	2	0.77106	0.011312	0.0385615
P06208	YNL104C	Leu4p	2-isopropylmalate synthase OS=Saccharomyces cerevisiae GN=LEU4 PE=1 SV=1 - [LEU1_YEAST]	7.27	4	1.3591	0.0114954	0.0390286
P37012	YMR105C	Pgm2p	Phosphoglucomutase-2 OS=Saccharomyces cerevisiae GN=PGM2 PE=1 SV=1 - [PGM2_YEAST]	14.59	6	2.72645	0.0116204	0.039277
P07258	YOR303W	Cpa1p	Carbamoyl-phosphate synthase arginine-specific small chain OS=Saccharomyces cerevisiae GN=CPA1 PE=1 SV=1 - [CARA_YEAST]	5.84	2	0.733378	0.0116973	0.039277
Q06644	YDR307W	Pmt7p	Probable dolichyl-phosphate-mannose--protein mannosyltransferase 7 OS=Saccharomyces cerevisiae GN=PMT7 PE=1 SV=1 - [PMT7_YEAST]	1.36	1	1.31401	0.0117085	0.039277
P07702	YBR115C	Lys2p	L-aminoadipate-semialdehyde dehydrogenase OS=Saccharomyces cerevisiae GN=LYS2 PE=1 SV=2 - [LYS2_YEAST]	2.8	3	1.20911	0.0118059	0.0393191
P10659	YLR180W	Sam1p	S-adenosylmethionine synthase 1 OS=Saccharomyces cerevisiae GN=SAM1 PE=1 SV=2 - [METK1_YEAST]	21.2	5	0.623259	0.0118144	0.0393191
P00358	YJR009C	Tdh2p	Glyceraldehyde-3-phosphate dehydrogenase 2 OS=Saccharomyces cerevisiae GN=TDH2 PE=1 SV=3 - [G3P2_YEAST]	54.82	23	1.25224	0.0121515	0.0402816
P04807	YGL253W	Hxk2p	Hexokinase-2 OS=Saccharomyces cerevisiae GN=HXK2 PE=1 SV=4 - [HXKB_YEAST]	19.75	8	0.841518	0.0124969	0.041133
P33767	YEL002C	Wbp1p	Dolichyl-diphosphooligosaccharide--protein glycosyltransferase subunit WBP1 OS=Saccharomyces cerevisiae GN=WBP1 PE=1 SV=1 - [OSTB_YEAST]	2.79	2	1.21508	0.012506	0.041133
P53012	YGL126W	Scs3p	FIT family protein SCS3 OS=Saccharomyces cerevisiae GN=SCS3 PE=1 SV=1 - [SCS3_YEAST]	5	1	1.64082	0.012616	0.0413333
P40024	YER036C	Arb1p	ABC transporter ATP-binding protein ARB1 OS=Saccharomyces cerevisiae GN=ARB1 PE=1 SV=1 - [ARB1_YEAST]	5.41	3	0.547725	0.0127626	0.0416515
Q03940	YDR190C	Rvb1p	RuvB-like protein 1 OS=Saccharomyces cerevisiae GN=RVB1 PE=1 SV=1 - [RUVB1_YEAST]	1.73	1	0.785711	0.0128378	0.0417353
P53090	YGL202W	Aro8p	Aromatic amino acid aminotransferase 1 OS=Saccharomyces cerevisiae GN=ARO8 PE=1 SV=1 - [ARO8_YEAST]	11.2	4	1.17255	0.013259	0.0429389
P25555	YCL011C	Gbp2p	Single-strand telomeric DNA-binding protein GBP2 OS=Saccharomyces cerevisiae GN=GBP2 PE=1 SV=1 - [GBP2_YEAST]	3.04	1	0.717833	0.0133806	0.0431336
P26786	YOR096W	Rps7Ap	40S ribosomal protein S7-A OS=Saccharomyces cerevisiae GN=RPS7A PE=1 SV=4 - [RS7A_YEAST]	21.05	4	0.910088	0.0134288	0.0431336
P00560	YCR012W	Pgk1p	Phosphoglycerate kinase OS=Saccharomyces cerevisiae GN=PGK1 PE=1 SV=2 - [PGK_YEAST]	53.37	17	1.0649	0.0134728	0.0431336
P38777	YHR049W	Fsh1p	Family of serine hydrolases 1 OS=Saccharomyces cerevisiae GN=FSH1 PE=1 SV=1 - [FSH1_YEAST]	14.4	3	0.501499	0.0135741	0.0432933
P11075	YDR170C	Sec7p	Protein transport protein SEC7 OS=Saccharomyces cerevisiae GN=SEC7 PE=1 SV=2 - [SEC7_YEAST]	0.95	2	0.897781	0.0137363	0.0436158
P28321	YKL094W	Yju3p	Serine hydrolase YJU3 OS=Saccharomyces cerevisiae GN=YJU3 PE=1 SV=2 - [YJU3_YEAST]	2.56	1	1.3438	0.0137789	0.0436158
P38697	YHR216W	Imd2p	Inosine-5'-monophosphate dehydrogenase IMD2 OS=Saccharomyces cerevisiae GN=IMD2 PE=1 SV=1 - [IMDH2_YEAST]	3.44	1	1.41988	0.0143511	0.0452257
Q04458	YMR110C	Hfd1p	Putative fatty aldehyde dehydrogenase HFD1 OS=Saccharomyces cerevisiae GN=HFD1 PE=1 SV=1 - [HFD1_YEAST]	3.01	1	1.79627	0.0144129	0.0452257
P16861	YGR240C	Pfk1p	6-phosphofructokinase subunit alpha OS=Saccharomyces cerevisiae GN=PFK1 PE=1 SV=1 - [K6PF1_YEAST]	9.22	9	0.874297	0.0144486	0.0452257
P09938	YJL026W	Rnr2p	Ribonucleoside-diphosphate reductase small chain 1 OS=Saccharomyces cerevisiae GN=RNR2 PE=1 SV=2 - [RIR2_YEAST]	19.55	6	1.73117	0.0145486	0.0453702
P32074	YNL287W	Sec21p	Coatomer subunit gamma OS=Saccharomyces cerevisiae GN=SEC21 PE=1 SV=2 - [COPG_YEAST]	3.21	3	0.840667	0.0146958	0.0456601
P17967	YCL043C	Pdi1p	Protein disulfide-isomerase OS=Saccharomyces cerevisiae GN=PDI1 PE=1 SV=2 - [PDI_YEAST]	19.16	10	1.14763	0.0148242	0.0458895
P49367	YDR234W	Lys4p	Homoaconitase, mitochondrial OS=Saccharomyces cerevisiae GN=LYS4 PE=1 SV=1 - [LYS4_YEAST]	1.59	2	0.75181	0.0152148	0.0469262
P25605	YCL009C	Ilv6p	Acetolactate synthase small subunit, mitochondrial OS=Saccharomyces cerevisiae GN=ILV6 PE=1 SV=2 - [ILV6_YEAST]	25.57	5	1.0795	0.0155149	0.0476771
P32481	YER025W	Gcd11p	Eukaryotic translation initiation factor 2 subunit gamma OS=Saccharomyces cerevisiae GN=GCD11 PE=1 SV=1 - [IF2G_YEAST]	10.63	4	0.853334	0.0157123	0.0481081
P05737	YGL076C	Rpl7Ap	60S ribosomal protein L7-A OS=Saccharomyces cerevisiae GN=RPL7A PE=1 SV=3 - [RL7A_YEAST]	35.66	6	1.10387	0.0158282	0.0482876
P32458	YJR076C	Cdc11p	Cell division control protein 11 OS=Saccharomyces cerevisiae GN=CDC11 PE=1 SV=1 - [CDC11_YEAST]	5.78	2	1.17568	0.0160138	0.0486773
P02405	YNL162W	Rpl42Ap	60S ribosomal protein L42 OS=Saccharomyces cerevisiae GN=RPL42A PE=1 SV=3 - [RL44_YEAST]	10.38	3	0.809749	0.016194	0.0487875
P38736	YHL031C	Gos1p	Protein transport protein GOS1 OS=Saccharomyces cerevisiae GN=GOS1 PE=1 SV=1 - [GOS1_YEAST]	4.48	1	0.324244	0.0162588	0.0487875
B3LLV5	YMR062C	Arg7p	Arginine biosynthesis bifunctional protein ArgJ, mitochondrial OS=Saccharomyces cerevisiae (strain RM11-1a) GN=ARG7 PE=3 SV=1 - [ARGJ_YEAS1]	2.04	1	1.16568	0.0162761	0.0487875
P00549	YAL038W	Pyk1p	Pyruvate kinase 1 OS=Saccharomyces cerevisiae GN=PYK1 PE=1 SV=2 - [KPYK1_YEAST]	64.8	22	1.20708	0.0162818	0.0487875
P53893	YNL163C	Ria1p	Ribosome assembly protein 1 OS=Saccharomyces cerevisiae GN=RIA1 PE=1 SV=1 - [RIA1_YEAST]	1.08	1	0.744694	0.0164238	0.0489445
P27929	YNL137C	Nam9p	37S ribosomal protein NAM9, mitochondrial OS=Saccharomyces cerevisiae GN=NAM9 PE=1 SV=2 - [NAM9_YEAST]	1.65	1	1.27398	0.0164505	0.0489445
P00925	YHR174W	Eno2p	Enolase 2 OS=Saccharomyces cerevisiae GN=ENO2 PE=1 SV=2 - [ENO2_YEAST]	51.03	26	0.902624	0.0165666	0.0489497
P39743	YDR388W	Rvs167p	Reduced viability upon starvation protein 167 OS=Saccharomyces cerevisiae GN=RVS167 PE=1 SV=1 - [RV167_YEAST]	4.15	2	0.708854	0.0165685	0.0489497
Q12074	YPR069C	Spe3p	Spermidine synthase OS=Saccharomyces cerevisiae GN=SPE3 PE=1 SV=1 - [SPEE_YEAST]	5.8	2	0.722574	0.016749	0.04931
P40509	YIL076W	Sec28p	Coatomer subunit epsilon OS=Saccharomyces cerevisiae GN=SEC28 PE=1 SV=2 - [COPE_YEAST]	7.09	2	0.814327	0.0170339	0.049974
P53030	YGL135W	Rpl1Ap	60S ribosomal protein L1 OS=Saccharomyces cerevisiae GN=RPL1A PE=1 SV=1 - [RL1_YEAST]	19.35	3	1.11616	0.0172294	0.0502126
P12709	YBR196C	Pgi1p	Glucose-6-phosphate isomerase OS=Saccharomyces cerevisiae GN=PGI1 PE=1 SV=3 - [G6PI_YEAST]	27.98	12	1.18577	0.0172418	0.0502126
P06780	YPR165W	Rho1p	GTP-binding protein RHO1 OS=Saccharomyces cerevisiae GN=RHO1 PE=1 SV=3 - [RHO1_YEAST]	4.31	1	0.71606	0.0172941	0.0502126
Q06497	YPR128C	Ant1p	Peroxisomal adenine nucleotide transporter 1 OS=Saccharomyces cerevisiae GN=ANT1 PE=1 SV=1 - [ANT1_YEAST]	3.35	1	0.735444	0.017567	0.0507428
Q06344	YDR365C	Esf1p	Pre-rRNA-processing protein ESF1 OS=Saccharomyces cerevisiae GN=ESF1 PE=1 SV=1 - [ESF1_YEAST]	1.11	1	0.689773	0.0175972	0.0507428
A6ZRX0	YNL112W	Dbp2p	ATP-dependent RNA helicase DBP2 OS=Saccharomyces cerevisiae (strain YJM789) GN=DBP2 PE=3 SV=1 - [DBP2_YEAS7]	7.69	3	0.901705	0.0179357	0.0515421
P34160	YMR125W	Sto1p	Nuclear cap-binding protein complex subunit 1 OS=Saccharomyces cerevisiae GN=STO1 PE=1 SV=2 - [NCBP1_YEAST]	1.28	1	0.810524	0.0183537	0.0524369
P14922	YBR112C	Cyc8p	General transcriptional corepressor CYC8 OS=Saccharomyces cerevisiae GN=CYC8 PE=1 SV=2 - [CYC8_YEAST]	1.55	1	0.832942	0.0183716	0.0524369
P39929	YLR025W	Snf7p	Vacuolar-sorting protein SNF7 OS=Saccharomyces cerevisiae GN=SNF7 PE=1 SV=1 - [SNF7_YEAST]	3.33	1	0.827203	0.0185309	0.0527129
P39109	YDR135C	Ycf1p	Metal resistance protein YCF1 OS=Saccharomyces cerevisiae GN=YCF1 PE=1 SV=2 - [YCFI_YEAST]	2.51	3	1.41327	0.0187135	0.0530531
P32614	YEL047C	Yel047Cp	Fumarate reductase OS=Saccharomyces cerevisiae GN=YEL047C PE=1 SV=1 - [FRDS_YEAST]	3.4	2	1.25946	0.0187879	0.0530852
P28274	YBL039C	Ura7p	CTP synthase 1 OS=Saccharomyces cerevisiae GN=URA7 PE=1 SV=2 - [URA7_YEAST]	2.94	2	0.870457	0.0192535	0.0542189
P48589	YOR369C	Rps12p	40S ribosomal protein S12 OS=Saccharomyces cerevisiae GN=RPS12 PE=1 SV=1 - [RS12_YEAST]	27.97	3	0.839501	0.0200231	0.0561982
P38623	YLR248W	Rck2p	Serine/threonine-protein kinase RCK2 OS=Saccharomyces cerevisiae GN=RCK2 PE=1 SV=3 - [RCK2_YEAST]	2.13	1	0.266259	0.0202785	0.0564002
P38891	YHR208W	Bat1p	Branched-chain-amino-acid aminotransferase, mitochondrial OS=Saccharomyces cerevisiae GN=BAT1 PE=1 SV=1 - [BCA1_YEAST]	7.89	2	1.42919	0.0203274	0.0564002
P52286	YDR328C	Skp1p	Suppressor of kinetochore protein 1 OS=Saccharomyces cerevisiae GN=SKP1 PE=1 SV=2 - [SKP1_YEAST]	9.28	2	0.800082	0.0203384	0.0564002
Q12462	YOL147C	Pex11p	Peroxisomal membrane protein PMP27 OS=Saccharomyces cerevisiae GN=PEX11 PE=1 SV=2 - [PEX11_YEAST]	16.95	3	1.462	0.0203719	0.0564002
P32589	YPL106C	Sse1p	Heat shock protein homolog SSE1 OS=Saccharomyces cerevisiae GN=SSE1 PE=1 SV=4 - [HSP7F_YEAST]	12.55	6	0.828704	0.0204837	0.0564002
A6ZPE5	YOR310C	Nop58p	Nucleolar protein 58 OS=Saccharomyces cerevisiae (strain YJM789) GN=NOP58 PE=3 SV=1 - [NOP58_YEAS7]	4.89	2	0.833449	0.020497	0.0564002
P0C0X0	YLR264W	Rps28Bp	40S ribosomal protein S28-B OS=Saccharomyces cerevisiae GN=RPS28B PE=1 SV=1 - [RS28B_YEAST]	23.88	2	0.864621	0.0205904	0.0564727
P08536	YJR010W	Met3p	Sulfate adenylyltransferase OS=Saccharomyces cerevisiae GN=MET3 PE=1 SV=2 - [MET3_YEAST]	12.52	6	1.20582	0.0208275	0.0567841
P17255	YDL185W	Tfp1p	V-type proton ATPase catalytic subunit A OS=Saccharomyces cerevisiae GN=TFP1 PE=1 SV=3 - [VATA_YEAST]	16.34	15	1.13955	0.0208687	0.0567841
P20486	YBR135W	Cks1p	Cyclin-dependent kinases regulatory subunit OS=Saccharomyces cerevisiae GN=CKS1 PE=1 SV=1 - [CKS1_YEAST]	7.33	1	0.75987	0.0209063	0.0567841
P07278	YIL033C	Bcy1p	cAMP-dependent protein kinase regulatory subunit OS=Saccharomyces cerevisiae GN=BCY1 PE=1 SV=4 - [KAPR_YEAST]	10.1	2	1.39374	0.020987	0.0568201
P23254	YPR074C	Tkl1p	Transketolase 1 OS=Saccharomyces cerevisiae GN=TKL1 PE=1 SV=4 - [TKT1_YEAST]	19.71	9	0.873854	0.0212176	0.0572602
P41810	YDR238C	Sec26p	Coatomer subunit beta OS=Saccharomyces cerevisiae GN=SEC26 PE=1 SV=2 - [COPB_YEAST]	3.39	2	1.32356	0.0215469	0.0579633
P07172	YIL116W	His5p	Histidinol-phosphate aminotransferase OS=Saccharomyces cerevisiae GN=HIS5 PE=1 SV=2 - [HIS8_YEAST]	1.82	1	1.3107	0.0217198	0.0582422
P28707	YKL117W	Sba1p	Co-chaperone protein SBA1 OS=Saccharomyces cerevisiae GN=SBA1 PE=1 SV=3 - [SBA1_YEAST]	4.63	1	0.878954	0.0220817	0.0590248
P00815	YCL030C	His4p	Histidine biosynthesis trifunctional protein OS=Saccharomyces cerevisiae GN=HIS4 PE=1 SV=3 - [HIS2_YEAST]	7.13	4	1.14834	0.0222084	0.0591755
P49631	YPR043W	Rpl43Ap	60S ribosomal protein L43 OS=Saccharomyces cerevisiae GN=RPL43A PE=1 SV=2 - [RL43_YEAST]	23.91	3	0.647339	0.0224701	0.0596536
P14120	YGL030W	Rpl30p	60S ribosomal protein L30 OS=Saccharomyces cerevisiae GN=RPL30 PE=1 SV=3 - [RL30_YEAST]	11.43	1	1.16311	0.0225837	0.0596536
P09436	YBL076C	Ils1p	Isoleucyl-tRNA synthetase, cytoplasmic OS=Saccharomyces cerevisiae GN=ILS1 PE=1 SV=1 - [SYIC_YEAST]	6.72	7	1.27492	0.0226003	0.0596536
P32802	YLR083C	Emp70p	Transmembrane 9 superfamily member 1 OS=Saccharomyces cerevisiae GN=EMP70 PE=1 SV=2 - [TMN1_YEAST]	1.2	1	0.861444	0.0227262	0.0597983
P40010	YER006W	Nug1p	Nuclear GTP-binding protein NUG1 OS=Saccharomyces cerevisiae GN=NUG1 PE=1 SV=1 - [NUG1_YEAST]	1.54	1	0.706966	0.0228224	0.0598642
P17536	YNL079C	Tpm1p	Tropomyosin-1 OS=Saccharomyces cerevisiae GN=TPM1 PE=1 SV=1 - [TPM1_YEAST]	22.61	4	0.555787	0.023675	0.0617988
Q12118	YOR007C	Sgt2p	Small glutamine-rich tetratricopeptide repeat-containing protein 2 OS=Saccharomyces cerevisiae GN=SGT2 PE=1 SV=1 - [SGT2_YEAST]	9.25	3	0.823169	0.0237211	0.0617988
Q06405	YDR377W	Atp17p	ATP synthase subunit f, mitochondrial OS=Saccharomyces cerevisiae GN=ATP17 PE=1 SV=1 - [ATPK_YEAST]	8.91	1	1.48936	0.0237837	0.0617988
P00931	YGL026C	Trp5p	Tryptophan synthase OS=Saccharomyces cerevisiae GN=TRP5 PE=1 SV=1 - [TRP_YEAST]	8.49	6	1.11651	0.0238947	0.0617988
P19414	YLR304C	Aco1p	Aconitate hydratase, mitochondrial OS=Saccharomyces cerevisiae GN=ACO1 PE=1 SV=2 - [ACON_YEAST]	10.93	6	0.906914	0.0239269	0.0617988
P46655	YGL245W	Gus1p	Glutamyl-tRNA synthetase, cytoplasmic OS=Saccharomyces cerevisiae GN=GUS1 PE=1 SV=3 - [SYEC_YEAST]	19.49	13	1.06766	0.0240922	0.0620355
P53903	YNL149C	Pga2p	Processing of GAS1 and ALP protein 2 OS=Saccharomyces cerevisiae GN=PGA2 PE=1 SV=3 - [PGA2_YEAST]	10.85	1	0.664286	0.024395	0.0626238
Q03973	YDR174W	Hmo1p	High mobility group protein 1 OS=Saccharomyces cerevisiae GN=HMO1 PE=1 SV=1 - [HMO1_YEAST]	4.47	1	0.744381	0.0250787	0.0641831
Q01855	YOL040C	Rps15p	40S ribosomal protein S15 OS=Saccharomyces cerevisiae GN=RPS15 PE=1 SV=1 - [RS15_YEAST]	28.17	2	0.707243	0.0258269	0.0658977
P09624	YFL018C	Lpd1p	Dihydrolipoyl dehydrogenase, mitochondrial OS=Saccharomyces cerevisiae GN=LPD1 PE=1 SV=1 - [DLDH_YEAST]	13.03	4	1.1312	0.0265195	0.0674605
Q12100	YDL025C	Ydl025Cp	Probable serine/threonine-protein kinase YDL025C OS=Saccharomyces cerevisiae GN=YDL025C PE=1 SV=1 - [KD025_YEAST]	3.87	2	0.747283	0.0270747	0.0686196
P51402	YDR500C	Rpl37Bp	60S ribosomal protein L37-B OS=Saccharomyces cerevisiae GN=RPL37B PE=1 SV=2 - [RL37B_YEAST]	22.73	3	0.823944	0.0271381	0.0686196
P22579	YOL004W	Sin3p	Transcriptional regulatory protein SIN3 OS=Saccharomyces cerevisiae GN=SIN3 PE=1 SV=2 - [SIN3_YEAST]	1.04	1	2.07915	0.0275811	0.0695308
P39726	YAL044C	Gcv3p	Glycine cleavage system H protein, mitochondrial OS=Saccharomyces cerevisiae GN=GCV3 PE=1 SV=3 - [GCSH_YEAST]	8.24	1	0.803325	0.0278303	0.0698053
P40561	YIR001C	Sgn1p	RNA-binding protein SGN1 OS=Saccharomyces cerevisiae GN=SGN1 PE=1 SV=1 - [SGN1_YEAST]	4	1	0.780277	0.0278558	0.0698053
P02407	YML024W	Rps17Ap	40S ribosomal protein S17-A OS=Saccharomyces cerevisiae GN=RPS17A PE=1 SV=1 - [RS17A_YEAST]	39.71	5	0.791617	0.0281714	0.0703867
P20051	YLR420W	Ura4p	Dihydroorotase OS=Saccharomyces cerevisiae GN=URA4 PE=1 SV=2 - [PYRC_YEAST]	4.67	1	1.26345	0.0284118	0.0707773
P13259	YGR202C	Pct1p	Choline-phosphate cytidylyltransferase OS=Saccharomyces cerevisiae GN=PCT1 PE=1 SV=2 - [PCY1_YEAST]	3.77	1	0.75915	0.0292003	0.072527
P10869	YER052C	Hom3p	Aspartokinase OS=Saccharomyces cerevisiae GN=HOM3 PE=1 SV=2 - [AK_YEAST]	10.25	5	1.1341	0.0299507	0.074172
P22696	YJR017C	Ess1p	Peptidyl-prolyl cis-trans isomerase ESS1 OS=Saccharomyces cerevisiae GN=ESS1 PE=1 SV=3 - [ESS1_YEAST]	10	1	0.822789	0.0304085	0.075085
P05749	YLR061W	Rpl22Ap	60S ribosomal protein L22-A OS=Saccharomyces cerevisiae GN=RPL22A PE=1 SV=3 - [RL22A_YEAST]	5.79	1	0.681346	0.0305385	0.0751241
P38922	YNL004W	Hrb1p	Protein HRB1 OS=Saccharomyces cerevisiae GN=HRB1 PE=1 SV=2 - [HRB1_YEAST]	4.41	2	0.7572	0.0306028	0.0751241
P29453	YLL045C	Rpl8Bp	60S ribosomal protein L8-B OS=Saccharomyces cerevisiae GN=RPL8B PE=1 SV=3 - [RL8B_YEAST]	38.67	9	0.825502	0.0307289	0.0752144
P36044	YKL201C	Mnn4p	Protein MNN4 OS=Saccharomyces cerevisiae GN=MNN4 PE=2 SV=2 - [MNN4_YEAST]	0.93	1	0.780105	0.0308766	0.0753567
P39986	YEL031W	Spf1p	Probable cation-transporting ATPase 1 OS=Saccharomyces cerevisiae GN=SPF1 PE=1 SV=1 - [ATC6_YEAST]	3.21	3	1.45191	0.0310662	0.0756004
Q03161	YMR099C	Ymr099Cp	Glucose-6-phosphate 1-epimerase OS=Saccharomyces cerevisiae GN=YMR099C PE=1 SV=1 - [YMY9_YEAST]	3.37	1	0.823114	0.0314549	0.0763256
P36136	YKR043C	Ykr043Cp	Uncharacterized protein YKR043C OS=Saccharomyces cerevisiae GN=YKR043C PE=1 SV=1 - [YK23_YEAST]	8.12	2	0.828041	0.0317035	0.0767079
P38972	YGR061C	Ade6p	Phosphoribosylformylglycinamidine synthase OS=Saccharomyces cerevisiae GN=ADE6 PE=1 SV=2 - [PUR4_YEAST]	3.02	3	0.792436	0.0325292	0.0784802
P37263	YCR087C-A	Ycr087C-Ap	UPF0743 protein YCR087C-A OS=Saccharomyces cerevisiae GN=YCR087C-A PE=1 SV=1 - [YC16_YEAST]	7.84	1	0.555631	0.0327566	0.0788031
P39976	YEL071W	Dld3p	D-lactate dehydrogenase [cytochrome] 3 OS=Saccharomyces cerevisiae GN=DLD3 PE=1 SV=1 - [DLD3_YEAST]	13.91	5	1.11296	0.0332237	0.0796991
P01095	YNL015W	Pbi2p	Protease B inhibitors 2 and 1 OS=Saccharomyces cerevisiae GN=PBI2 PE=1 SV=3 - [IPB2_YEAST]	22.67	1	1.59145	0.0334778	0.0800805
P40553	YIL010W	Dot5p	Peroxiredoxin DOT5 OS=Saccharomyces cerevisiae GN=DOT5 PE=1 SV=1 - [DOT5_YEAST]	6.05	1	0.642778	0.0339432	0.0808584
P38791	YHR068W	Dys1p	Deoxyhypusine synthase OS=Saccharomyces cerevisiae GN=DYS1 PE=1 SV=1 - [DHYS_YEAST]	16.54	8	1.11918	0.0340198	0.0808584
P21576	YKR001C	Vps1p	Vacuolar protein sorting-associated protein 1 OS=Saccharomyces cerevisiae GN=VPS1 PE=1 SV=2 - [VPS1_YEAST]	1.42	1	0.794728	0.0340911	0.0808584
P40212	YMR142C	Rpl13Bp	60S ribosomal protein L13-B OS=Saccharomyces cerevisiae GN=RPL13B PE=1 SV=1 - [RL13B_YEAST]	15.08	7	0.700802	0.0343278	0.081191
P13663	YDR158W	Hom2p	Aspartate-semialdehyde dehydrogenase OS=Saccharomyces cerevisiae GN=HOM2 PE=1 SV=1 - [DHAS_YEAST]	20.55	8	1.06569	0.0345482	0.0814834
P00927	YER086W	Ilv1p	Threonine dehydratase, mitochondrial OS=Saccharomyces cerevisiae GN=ILV1 PE=1 SV=2 - [THDH_YEAST]	4.86	2	0.853484	0.0347977	0.0818426
Q02793	YGL213C	Ski8p	Antiviral protein SKI8 OS=Saccharomyces cerevisiae GN=SKI8 PE=1 SV=1 - [SKI8_YEAST]	1.76	1	1.17245	0.0349083	0.081874
P00890	YNR001C	Cit1p	Citrate synthase, mitochondrial OS=Saccharomyces cerevisiae GN=CIT1 PE=1 SV=2 - [CISY1_YEAST]	3.97	2	1.24686	0.0361031	0.084441
P33399	YDL051W	Lah1p	La protein homolog OS=Saccharomyces cerevisiae GN=LAH1 PE=1 SV=2 - [LAH1_YEAST]	3.64	1	0.798456	0.0373743	0.0871722
P26321	YPL131W	Rpl5p	60S ribosomal protein L5 OS=Saccharomyces cerevisiae GN=RPL5 PE=1 SV=4 - [RL5_YEAST]	31.99	5	0.94323	0.037506	0.0872113
P33775	YDL095W	Pmt1p	Dolichyl-phosphate-mannose--protein mannosyltransferase 1 OS=Saccharomyces cerevisiae GN=PMT1 PE=1 SV=1 - [PMT1_YEAST]	3.79	2	1.2884	0.0375982	0.0872113
P17891	YGR167W	Clc1p	Clathrin light chain OS=Saccharomyces cerevisiae GN=CLC1 PE=1 SV=1 - [CLC1_YEAST]	18.88	4	0.763986	0.0378034	0.0874463
Q00618	YJL031C	Bet4p	Geranylgeranyl transferase type-2 subunit alpha OS=Saccharomyces cerevisiae GN=BET4 PE=1 SV=3 - [PGTA_YEAST]	2.75	1	1.16355	0.0381679	0.0880475
P81449	YDR322C-A	Tim11p	ATP synthase subunit e, mitochondrial OS=Saccharomyces cerevisiae GN=TIM11 PE=1 SV=2 - [ATPJ_YEAST]	11.46	1	0.784885	0.0386347	0.0888809
Q08224	YOL055C	Thi20p	Hydroxymethylpyrimidine/phosphomethylpyrimidine kinase THI20 OS=Saccharomyces cerevisiae GN=THI20 PE=1 SV=1 - [THI20_YEAST]	3.63	1	1.60347	0.0389228	0.089282
Q01477	YER151C	Ubp3p	Ubiquitin carboxyl-terminal hydrolase 3 OS=Saccharomyces cerevisiae GN=UBP3 PE=1 SV=1 - [UBP3_YEAST]	1.97	1	0.726299	0.0390211	0.089282
B3LN00	SCRG_02811	Scrg_02811p	3-ketoacyl-CoA reductase OS=Saccharomyces cerevisiae (strain RM11-1a) GN=SCRG_02811 PE=3 SV=1 - [MKAR_YEAS1]	6.05	2	0.911141	0.0395563	0.0900459
P20459	YJR007W	Sui2p	Eukaryotic translation initiation factor 2 subunit alpha OS=Saccharomyces cerevisiae GN=SUI2 PE=1 SV=1 - [IF2A_YEAST]	3.29	1	0.828145	0.0395889	0.0900459
P43535	YFR009W	Gcn20p	Protein GCN20 OS=Saccharomyces cerevisiae GN=GCN20 PE=1 SV=1 - [GCN20_YEAST]	3.86	2	1.2924	0.0396758	0.0900459
P23287	YLR433C	Cna1p	Serine/threonine-protein phosphatase 2B catalytic subunit A1 OS=Saccharomyces cerevisiae GN=CNA1 PE=1 SV=2 - [PP2B1_YEAST]	1.81	1	1.14085	0.0400713	0.0906991
P53191	YGL023C	Pib2p	Phosphatidylinositol-3-phosphate-binding protein 2 OS=Saccharomyces cerevisiae GN=PIB2 PE=1 SV=1 - [PIB2_YEAST]	1.89	1	0.72965	0.040373	0.0909058
P32179	YOL064C	Hal2p	3'(2'),5'-bisphosphate nucleotidase OS=Saccharomyces cerevisiae GN=HAL2 PE=1 SV=1 - [HAL2_YEAST]	14.57	6	1.2158	0.0403786	0.0909058
Q12386	YOR141C	Arp8p	Actin-like protein ARP8 OS=Saccharomyces cerevisiae GN=ARP8 PE=1 SV=1 - [ARP8_YEAST]	0.91	1	1.19057	0.0414366	0.0930389
A6ZVM6	YIL043C	Cbr1p	NADH-cytochrome b5 reductase 1 OS=Saccharomyces cerevisiae (strain YJM789) GN=CBR1 PE=2 SV=2 - [NCB5R_YEAS7]	11.62	2	1.50436	0.0418665	0.0937542
P43561	YFL041W	Fet5p	Iron transport multicopper oxidase FET5 OS=Saccharomyces cerevisiae GN=FET5 PE=1 SV=1 - [FET5_YEAST]	5.31	2	0.751408	0.0425263	0.0949792
P38352	YBR280C	Saf1p	SCF-associated factor 1 OS=Saccharomyces cerevisiae GN=SAF1 PE=1 SV=2 - [SAF1_YEAST]	1.41	1	1.56531	0.0431877	0.0962012
P14126	YOR063W	Rpl3p	60S ribosomal protein L3 OS=Saccharomyces cerevisiae GN=RPL3 PE=1 SV=4 - [RL3_YEAST]	35.4	15	1.10443	0.0444972	0.0988566
P53731	YNR035C	Arc35p	Actin-related protein 2/3 complex subunit 2 OS=Saccharomyces cerevisiae GN=ARC35 PE=1 SV=1 - [ARPC2_YEAST]	10.82	2	1.231	0.0449023	0.0994941
Q12460	YLR197W	Nop56p	Nucleolar protein 56 OS=Saccharomyces cerevisiae GN=NOP56 PE=1 SV=1 - [NOP56_YEAST]	11.71	4	0.800805	0.0459295	0.101503
P53111	YGL157W	Ari1p	NADPH-dependent aldehyde reductase ARI1 OS=Saccharomyces cerevisiae GN=ARI1 PE=1 SV=1 - [ARI1_YEAST]	4.32	1	0.579982	0.0463669	0.101961
Q12451	YDL019C	Osh2p	Oxysterol-binding protein homolog 2 OS=Saccharomyces cerevisiae GN=OSH2 PE=1 SV=1 - [OSH2_YEAST]	1.01	1	1.39191	0.0463791	0.101961
P04173	YCL018W	Leu2p	3-isopropylmalate dehydrogenase OS=Saccharomyces cerevisiae GN=LEU2 PE=1 SV=4 - [LEU3_YEAST]	19.78	4	1.16442	0.0465475	0.102065
P53852	YNL247W	Ynl247Wp	Cysteinyl-tRNA synthetase OS=Saccharomyces cerevisiae GN=YNL247W PE=1 SV=1 - [SYC_YEAST]	8.34	5	0.845832	0.046996	0.102781
P46992	YJL171C	Yjl171Cp	Cell wall protein YJL171C OS=Saccharomyces cerevisiae GN=YJL171C PE=1 SV=1 - [YJR1_YEAST]	3.28	1	1.25468	0.0484183	0.105455
P42938	YGR205W	Ygr205Wp	Uncharacterized kinase YGR205W OS=Saccharomyces cerevisiae GN=YGR205W PE=1 SV=1 - [YG4F_YEAST]	4.48	1	1.30983	0.0484692	0.105455
P32561	YNL330C	Rpd3p	Histone deacetylase RPD3 OS=Saccharomyces cerevisiae GN=RPD3 PE=1 SV=1 - [RPD3_YEAST]	3.93	1	2.03554	0.0494175	0.107241
P38197	YBL036C	Ybl036Cp	UPF0001 protein YBL036C OS=Saccharomyces cerevisiae GN=YBL036C PE=1 SV=1 - [YBD6_YEAST]	6.23	1	0.806427	0.0502005	0.10866
P47076	YJL011C	Rpc17p	DNA-directed RNA polymerase III subunit RPC9 OS=Saccharomyces cerevisiae GN=RPC17 PE=1 SV=1 - [RPC9_YEAST]	9.32	1	0.569464	0.0503427	0.108689
B3LTK6	YIR003W	Aim21p	Altered inheritance of mitochondria protein 21 OS=Saccharomyces cerevisiae (strain RM11-1a) GN=AIM21 PE=3 SV=1 - [AIM21_YEAS1]	1.23	1	0.640972	0.0505971	0.108845
P04050	YDL140C	Rpb1p	DNA-directed RNA polymerase II subunit RPB1 OS=Saccharomyces cerevisiae GN=RPB1 PE=1 SV=2 - [RPB1_YEAST]	2.54	4	1.06221	0.0506735	0.108845
P32468	YHR107C	Cdc12p	Cell division control protein 12 OS=Saccharomyces cerevisiae GN=CDC12 PE=1 SV=1 - [CDC12_YEAST]	11.3	3	0.878592	0.0511898	0.109674
P27616	YAR015W	Ade1p	Phosphoribosylaminoimidazole-succinocarboxamide synthase OS=Saccharomyces cerevisiae GN=ADE1 PE=1 SV=2 - [PUR7_YEAST]	22.22	5	0.822115	0.051414	0.109875
P38067	YBR006W	Uga2p	Succinate-semialdehyde dehydrogenase [NADP+] OS=Saccharomyces cerevisiae GN=UGA2 PE=1 SV=2 - [UGA2_YEAST]	2.82	1	1.2076	0.0516657	0.110133
P53849	YNL255C	Gis2p	Zinc finger protein GIS2 OS=Saccharomyces cerevisiae GN=GIS2 PE=1 SV=1 - [GIS2_YEAST]	20.26	2	0.886689	0.0526676	0.111985
P40363	YJL068C	Yjl068Cp	S-formylglutathione hydrolase OS=Saccharomyces cerevisiae GN=YJL068C PE=1 SV=1 - [SFGH_YEAST]	3.01	1	1.13067	0.054259	0.114902
P39077	YJL014W	Cct3p	T-complex protein 1 subunit gamma OS=Saccharomyces cerevisiae GN=CCT3 PE=1 SV=2 - [TCPG_YEAST]	8.43	4	0.853431	0.0543122	0.114902
P08566	YDR127W	Aro1p	Pentafunctional AROM polypeptide OS=Saccharomyces cerevisiae GN=ARO1 PE=1 SV=1 - [ARO1_YEAST]	3.46	4	1.24521	0.0550774	0.116228
P02309	YNL030W	Hhf1p	Histone H4 OS=Saccharomyces cerevisiae GN=HHF1 PE=1 SV=2 - [H4_YEAST]	20.39	2	0.882764	0.0552399	0.11628
Q03337	YDR472W	Trs31p	Transport protein particle 31 kDa subunit OS=Saccharomyces cerevisiae GN=TRS31 PE=1 SV=1 - [TRS31_YEAST]	3.18	1	1.16053	0.0584276	0.122248
P53960	YNL040W	Ynl040Wp	Putative alanyl-tRNA editing protein alaX OS=Saccharomyces cerevisiae GN=YNL040W PE=1 SV=1 - [YNE0_YEAST]	3.95	1	0.625379	0.0584426	0.122248
P0C2I0	YOR312C	Rpl20Ap	60S ribosomal protein L20 OS=Saccharomyces cerevisiae GN=RPL20A PE=1 SV=2 - [RL20_YEAST]	17.44	3	1.08442	0.0585108	0.122248
Q06678	YDR322W	Mrpl35p	54S ribosomal protein L35, mitochondrial OS=Saccharomyces cerevisiae GN=MRPL35 PE=1 SV=1 - [RM35_YEAST]	3.54	1	1.44848	0.0590971	0.123168
P53622	YDL145C	Cop1p	Coatomer subunit alpha OS=Saccharomyces cerevisiae GN=COP1 PE=1 SV=2 - [COPA_YEAST]	2.25	2	0.914155	0.0597194	0.124157
Q06188	YLR455W	Ylr455Wp	PWWP domain-containing protein YLR455W OS=Saccharomyces cerevisiae GN=YLR455W PE=1 SV=1 - [YL455_YEAST]	2.96	1	0.794934	0.0608418	0.126179
P38754	YHL001W	Rpl14Bp	60S ribosomal protein L14-B OS=Saccharomyces cerevisiae GN=RPL14B PE=1 SV=1 - [RL14B_YEAST]	31.88	5	0.824639	0.0611955	0.126204
P30624	YOR317W	Faa1p	Long-chain-fatty-acid--CoA ligase 1 OS=Saccharomyces cerevisiae GN=FAA1 PE=1 SV=1 - [LCF1_YEAST]	8.57	4	0.744788	0.0612494	0.126204
P43588	YFR004W	Rpn11p	26S proteasome regulatory subunit RPN11 OS=Saccharomyces cerevisiae GN=RPN11 PE=1 SV=1 - [RPN11_YEAST]	10.78	3	0.894363	0.0613031	0.126204
Q08235	YOL077C	Brx1p	Ribosome biogenesis protein BRX1 OS=Saccharomyces cerevisiae GN=BRX1 PE=1 SV=1 - [BRX1_YEAST]	4.81	1	0.802668	0.0620882	0.127428
Q03690	YMR012W	Tif31p	Protein TIF31 OS=Saccharomyces cerevisiae GN=TIF31 PE=1 SV=1 - [TIF31_YEAST]	3.05	3	1.18268	0.0622005	0.127428
P35719	YKL142W	Mrp8p	Uncharacterized protein MRP8 OS=Saccharomyces cerevisiae GN=MRP8 PE=1 SV=1 - [MRP8_YEAST]	5.02	1	0.729977	0.0630175	0.1287
P47006	YJL148W	Rpa34p	DNA-directed RNA polymerase I subunit RPA34 OS=Saccharomyces cerevisiae GN=RPA34 PE=1 SV=1 - [RPA34_YEAST]	5.58	2	1.11862	0.0631272	0.1287
P40462	YIL137C	Tma108p	Protein TMA108 OS=Saccharomyces cerevisiae GN=TMA108 PE=1 SV=1 - [TM108_YEAST]	1.37	1	1.24479	0.0640272	0.13022
Q12114	YLR330W	Chs5p	Chitin biosynthesis protein CHS5 OS=Saccharomyces cerevisiae GN=CHS5 PE=1 SV=1 - [CHS5_YEAST]	3.28	2	0.810735	0.0650206	0.131921
P46969	YJL121C	Rpe1p	Ribulose-phosphate 3-epimerase OS=Saccharomyces cerevisiae GN=RPE1 PE=1 SV=1 - [RPE_YEAST]	15.55	2	0.878108	0.0652724	0.132114
P00044	YJR048W	Cyc1p	Cytochrome c iso-1 OS=Saccharomyces cerevisiae GN=CYC1 PE=1 SV=2 - [CYC1_YEAST]	25.69	2	0.733743	0.066095	0.133458
Q05506	YDR341C	Ydr341Cp	Arginyl-tRNA synthetase, cytoplasmic OS=Saccharomyces cerevisiae GN=YDR341C PE=1 SV=1 - [SYRC_YEAST]	10.54	6	1.19221	0.068234	0.137448
P39006	YNL169C	Psd1p	Phosphatidylserine decarboxylase proenzyme 1, mitochondrial OS=Saccharomyces cerevisiae GN=PSD1 PE=1 SV=1 - [PSD1_YEAST]	4.6	1	1.39235	0.0684557	0.137565
P53969	YNL026W	Sam50p	Sorting assembly machinery 50 kDa subunit OS=Saccharomyces cerevisiae GN=SAM50 PE=1 SV=1 - [SAM50_YEAST]	1.65	1	1.13635	0.0693464	0.138669
Q06338	YDR361C	Bcp1p	Protein BCP1 OS=Saccharomyces cerevisiae GN=BCP1 PE=1 SV=1 - [BCP1_YEAST]	12.37	2	0.799255	0.0694764	0.138669
P12945	YDL040C	Nat1p	N-terminal acetyltransferase A complex subunit NAT1 OS=Saccharomyces cerevisiae GN=NAT1 PE=1 SV=2 - [NAT1_YEAST]	4.22	3	1.20069	0.0694993	0.138669
P00127	YFR033C	Qcr6p	Cytochrome b-c1 complex subunit 6 OS=Saccharomyces cerevisiae GN=QCR6 PE=1 SV=2 - [QCR6_YEAST]	8.16	1	0.772162	0.0700445	0.139427
P43639	YGL019W	Ckb1p	Casein kinase II subunit beta OS=Saccharomyces cerevisiae GN=CKB1 PE=1 SV=1 - [CSK2B_YEAST]	6.12	1	0.359631	0.070285	0.139575
P25349	YCR004C	Ycp4p	Flavoprotein-like protein YCP4 OS=Saccharomyces cerevisiae GN=YCP4 PE=1 SV=1 - [YCP4_YEAST]	5.26	1	0.506476	0.0705083	0.139689
P05736	YFR031C-A	Rpl2Ap	60S ribosomal protein L2 OS=Saccharomyces cerevisiae GN=RPL2A PE=1 SV=3 - [RL2_YEAST]	50.79	10	0.902679	0.0707754	0.139888
P41920	YDR002W	Yrb1p	Ran-specific GTPase-activating protein 1 OS=Saccharomyces cerevisiae GN=YRB1 PE=1 SV=1 - [YRB1_YEAST]	10.45	1	0.713104	0.070941	0.139888
P16521	YLR249W	Yef3p	Elongation factor 3A OS=Saccharomyces cerevisiae GN=YEF3 PE=1 SV=4 - [EF3A_YEAST]	17.53	15	0.825678	0.0712109	0.140092
P26783	YJR123W	Rps5p	40S ribosomal protein S5 OS=Saccharomyces cerevisiae GN=RPS5 PE=1 SV=3 - [RS5_YEAST]	24.44	4	0.912078	0.0715338	0.1404
Q00055	YDL022W	Gpd1p	Glycerol-3-phosphate dehydrogenase [NAD+] 1 OS=Saccharomyces cerevisiae GN=GPD1 PE=1 SV=4 - [GPD1_YEAST]	3.07	1	0.855264	0.07197	0.140662
P49090	YGR124W	Asn2p	Asparagine synthetase [glutamine-hydrolyzing] 2 OS=Saccharomyces cerevisiae GN=ASN2 PE=1 SV=2 - [ASNS2_YEAST]	4.72	3	1.17757	0.0720016	0.140662
Q04178	YDR399W	Hpt1p	Hypoxanthine-guanine phosphoribosyltransferase OS=Saccharomyces cerevisiae GN=HPT1 PE=1 SV=1 - [HPRT_YEAST]	9.5	1	0.569572	0.0738545	0.143935
P38069	YBR015C	Ttp1p	Protein TTP1 OS=Saccharomyces cerevisiae GN=TTP1 PE=1 SV=1 - [TTP1_YEAST]	5.7	2	1.3087	0.0740981	0.143935
Q04947	YDR233C	Rtn1p	Reticulon-like protein 1 OS=Saccharomyces cerevisiae GN=RTN1 PE=1 SV=1 - [RTN1_YEAST]	3.39	1	1.25396	0.0743374	0.143935
P51601	YGR267C	Fol2p	GTP cyclohydrolase 1 OS=Saccharomyces cerevisiae GN=FOL2 PE=1 SV=1 - [GCH1_YEAST]	8.64	2	1.24048	0.0743608	0.143935
P49095	YMR189W	Gcv2p	Glycine dehydrogenase [decarboxylating], mitochondrial OS=Saccharomyces cerevisiae GN=GCV2 PE=1 SV=1 - [GCSP_YEAST]	6.58	5	0.882728	0.0746494	0.144162
P53183	YGL039W	Ygl039Wp	Putative uncharacterized oxidoreductase YGL039W OS=Saccharomyces cerevisiae GN=YGL039W PE=1 SV=1 - [YGD9_YEAST]	4.31	1	1.18758	0.0750361	0.144535
P32368	YKL212W	Sac1p	Phosphoinositide phosphatase SAC1 OS=Saccharomyces cerevisiae GN=SAC1 PE=1 SV=1 - [SAC1_YEAST]	12.68	6	1.10651	0.0751856	0.144535
Q12122	YDL131W	Lys21p	Homocitrate synthase, mitochondrial OS=Saccharomyces cerevisiae GN=LYS21 PE=1 SV=1 - [HOSM_YEAST]	15.91	7	0.911	0.075723	0.145014
P05150	YJL088W	Arg3p	Ornithine carbamoyltransferase OS=Saccharomyces cerevisiae GN=ARG3 PE=1 SV=1 - [OTC_YEAST]	14.79	4	0.814404	0.0757791	0.145014
P39081	YDR228C	Pcf11p	Protein PCF11 OS=Saccharomyces cerevisiae GN=PCF11 PE=1 SV=2 - [PCF11_YEAST]	1.92	1	0.613209	0.0763092	0.145697
P37302	YBR286W	Ape3p	Aminopeptidase Y OS=Saccharomyces cerevisiae GN=APE3 PE=1 SV=1 - [APE3_YEAST]	2.05	1	1.33209	0.0780961	0.148408
P32590	YBR169C	Sse2p	Heat shock protein homolog SSE2 OS=Saccharomyces cerevisiae GN=SSE2 PE=1 SV=3 - [HSP79_YEAST]	3.03	2	1.1555	0.078266	0.148408
P54964	YLR059C	Rex2p	Oligoribonuclease, mitochondrial OS=Saccharomyces cerevisiae GN=REX2 PE=1 SV=1 - [ORN_YEAST]	6.32	2	0.941062	0.0784826	0.148408
Q96VH4	YCL026C-B	Hbn1p	Putative nitroreductase HBN1 OS=Saccharomyces cerevisiae GN=HBN1 PE=1 SV=1 - [HBN1_YEAST]	5.7	1	1.27431	0.0786783	0.148408
P15565	YDR120C	Trm1p	N(2),N(2)-dimethylguanosine tRNA methyltransferase, mitochondrial OS=Saccharomyces cerevisiae GN=TRM1 PE=1 SV=1 - [TRM1_YEAST]	3.51	1	1.34231	0.0788724	0.148408
P05748	YLR029C	Rpl15Ap	60S ribosomal protein L15-A OS=Saccharomyces cerevisiae GN=RPL15A PE=1 SV=3 - [RL15A_YEAST]	13.24	3	1.10402	0.0788831	0.148408
Q01560	YDR432W	Npl3p	Nucleolar protein 3 OS=Saccharomyces cerevisiae GN=NPL3 PE=1 SV=1 - [NOP3_YEAST]	6.04	2	0.84297	0.0789632	0.148408
P41058	YDL061C	Rps29Bp	40S ribosomal protein S29-B OS=Saccharomyces cerevisiae GN=RPS29B PE=1 SV=3 - [RS29B_YEAST]	55.36	4	0.935142	0.079324	0.148755
P48836	YHR039C-A	Vma10p	V-type proton ATPase subunit G OS=Saccharomyces cerevisiae GN=VMA10 PE=1 SV=1 - [VATG_YEAST]	20.18	3	0.855068	0.0795255	0.148801
P40157	YNL212W	Vid27p	Vacuolar import and degradation protein 27 OS=Saccharomyces cerevisiae GN=VID27 PE=1 SV=1 - [VID27_YEAST]	2.05	1	1.29492	0.0800468	0.149444
P54781	YMR015C	Erg5p	Cytochrome P450 61 OS=Saccharomyces cerevisiae GN=ERG5 PE=1 SV=1 - [ERG5_YEAST]	4.83	2	1.08706	0.0802575	0.14946
P26781	YDR025W	Rps11Ap	40S ribosomal protein S11 OS=Saccharomyces cerevisiae GN=RPS11A PE=1 SV=3 - [RS11_YEAST]	22.44	6	1.22461	0.0804104	0.14946
A6ZMK5	YMR146C	Tif34p	Eukaryotic translation initiation factor 3 subunit I OS=Saccharomyces cerevisiae (strain YJM789) GN=TIF34 PE=3 SV=1 - [EIF3I_YEAS7]	7.49	3	0.877552	0.0806518	0.149579
P32914	YGR063C	Spt4p	Transcription elongation factor SPT4 OS=Saccharomyces cerevisiae GN=SPT4 PE=1 SV=1 - [SPT4_YEAST]	18.63	1	0.633279	0.0808321	0.149584
P38625	YMR217W	Gua1p	GMP synthase [glutamine-hydrolyzing] OS=Saccharomyces cerevisiae GN=GUA1 PE=1 SV=4 - [GUAA_YEAST]	13.71	6	0.809888	0.081583	0.150642
P09440	YBR084W	Mis1p	C-1-tetrahydrofolate synthase, mitochondrial OS=Saccharomyces cerevisiae GN=MIS1 PE=1 SV=1 - [C1TM_YEAST]	9.44	6	0.682818	0.0827409	0.152446
P38249	YBR079C	Tif32p	Eukaryotic translation initiation factor 3 subunit A OS=Saccharomyces cerevisiae GN=TIF32 PE=1 SV=1 - [EIF3A_YEAST]	7.57	7	1.07136	0.0831723	0.152906
Q07381	YDL060W	Tsr1p	Ribosome biogenesis protein TSR1 OS=Saccharomyces cerevisiae GN=TSR1 PE=1 SV=1 - [TSR1_YEAST]	1.9	1	0.6447	0.0841621	0.154389
P14065	YOR120W	Gcy1p	Protein GCY OS=Saccharomyces cerevisiae GN=GCY1 PE=1 SV=1 - [GCY_YEAST]	11.54	3	2.57166	0.0843795	0.154451
P46677	YGR274C	Taf1p	Transcription initiation factor TFIID subunit 1 OS=Saccharomyces cerevisiae GN=TAF1 PE=1 SV=1 - [TAF1_YEAST]	1.41	1	0.785237	0.0861918	0.157426
P13188	YOR168W	Gln4p	Glutaminyl-tRNA synthetase OS=Saccharomyces cerevisiae GN=GLN4 PE=1 SV=2 - [SYQ_YEAST]	9.64	5	1.11115	0.0869939	0.158547
Q12166	YOR108W	Leu9p	2-isopropylmalate synthase 2, mitochondrial OS=Saccharomyces cerevisiae GN=LEU9 PE=1 SV=1 - [LEU9_YEAST]	4.97	3	0.89089	0.0875818	0.15901
Q08023	YLR077W	Fmp25p	Protein FMP25, mitochondrial OS=Saccharomyces cerevisiae GN=FMP25 PE=1 SV=1 - [FMP25_YEAST]	1.72	1	1.48114	0.0876253	0.15901
A6ZN26	YMR309C	Nip1p	Eukaryotic translation initiation factor 3 subunit C OS=Saccharomyces cerevisiae (strain YJM789) GN=NIP1 PE=3 SV=1 - [EIF3C_YEAS7]	0.99	1	0.862522	0.0880427	0.159424
P53303	YGR211W	Zpr1p	Zinc finger protein ZPR1 OS=Saccharomyces cerevisiae GN=ZPR1 PE=1 SV=1 - [ZPR1_YEAST]	8.23	3	0.71489	0.0883835	0.159697
P39105	YMR008C	Plb1p	Lysophospholipase 1 OS=Saccharomyces cerevisiae GN=PLB1 PE=1 SV=2 - [PLB1_YEAST]	1.36	1	0.865081	0.0899722	0.162038
Q05775	YLR192C	Hcr1p	Eukaryotic translation initiation factor 3 subunit J OS=Saccharomyces cerevisiae GN=HCR1 PE=1 SV=1 - [EIF3J_YEAST]	15.85	2	0.669194	0.0900639	0.162038
P32832	YMR091C	Npl6p	Chromatin structure-remodeling complex subunit RSC7 OS=Saccharomyces cerevisiae GN=NPL6 PE=1 SV=1 - [RSC7_YEAST]	3.68	1	0.674344	0.0906687	0.162724
P17079	YDR418W	Rpl12Ap	60S ribosomal protein L12 OS=Saccharomyces cerevisiae GN=RPL12A PE=1 SV=1 - [RL12_YEAST]	43.03	4	1.08699	0.0908317	0.162724
P15624	YLR060W	Frs1p	Phenylalanyl-tRNA synthetase beta chain OS=Saccharomyces cerevisiae GN=FRS1 PE=1 SV=3 - [SYFB_YEAST]	4.54	2	1.45685	0.0928936	0.166065
P31787	YGR037C	Acb1p	Acyl-CoA-binding protein OS=Saccharomyces cerevisiae GN=ACB1 PE=1 SV=3 - [ACBP_YEAST]	24.14	1	1.56611	0.0961985	0.171608
P12695	YNL071W	Pda2p	Dihydrolipoyllysine-residue acetyltransferase component of pyruvate dehydrogenase complex, mitochondrial OS=Saccharomyces cerevisiae GN=PDA2 PE=1 SV=1 - [ODP2_YEAST]	4.15	2	0.918649	0.0975215	0.173421
Q06106	YPR112C	Mrd1p	Multiple RNA-binding domain-containing protein 1 OS=Saccharomyces cerevisiae GN=MRD1 PE=1 SV=1 - [MRD1_YEAST]	1.92	1	0.826684	0.097648	0.173421
Q08647	YOR243C	Pus7p	Multisubstrate pseudouridine synthase 7 OS=Saccharomyces cerevisiae GN=PUS7 PE=1 SV=1 - [PUS7_YEAST]	1.63	1	0.900986	0.0978325	0.173421
P47120	YJR070C	Lia1p	Deoxyhypusine hydroxylase OS=Saccharomyces cerevisiae GN=LIA1 PE=1 SV=1 - [DOHH_YEAST]	20.31	5	0.907656	0.0985027	0.174242
P04037	YGL187C	Cox4p	Cytochrome c oxidase subunit 4, mitochondrial OS=Saccharomyces cerevisiae GN=COX4 PE=1 SV=1 - [COX4_YEAST]	19.35	2	0.902089	0.0988525	0.174494
P30775	YGL143C	Mrf1p	Peptide chain release factor 1, mitochondrial OS=Saccharomyces cerevisiae GN=MRF1 PE=1 SV=1 - [RF1M_YEAST]	2.18	1	1.17246	0.100981	0.177878
P40213	YMR143W	Rps16Ap	40S ribosomal protein S16 OS=Saccharomyces cerevisiae GN=RPS16A PE=1 SV=2 - [RS16_YEAST]	18.18	4	0.95579	0.101356	0.178167
Q05029	YMR237W	Bch1p	Protein BCH1 OS=Saccharomyces cerevisiae GN=BCH1 PE=1 SV=1 - [BCH1_YEAST]	1.66	1	1.2951	0.101751	0.178488
P40825	YOR335C	Ala1p	Alanyl-tRNA synthetase OS=Saccharomyces cerevisiae GN=ALA1 PE=1 SV=3 - [SYA_YEAST]	9.77	8	0.884037	0.102266	0.179019
P21965	YNL307C	Mck1p	Protein kinase MCK1 OS=Saccharomyces cerevisiae GN=MCK1 PE=1 SV=1 - [MCK1_YEAST]	6.67	2	1.10515	0.105385	0.183818
P05755	YBR189W	Rps9Bp	40S ribosomal protein S9-B OS=Saccharomyces cerevisiae GN=RPS9B PE=1 SV=4 - [RS9B_YEAST]	25.64	6	1.10206	0.105444	0.183818
A6ZUG8	YGR157W	Cho2p	Phosphatidylethanolamine N-methyltransferase OS=Saccharomyces cerevisiae (strain YJM789) GN=CHO2 PE=3 SV=1 - [CHO2_YEAS7]	1.84	1	1.29419	0.106468	0.185219
P54861	YLL001W	Dnm1p	Dynamin-related protein DNM1 OS=Saccharomyces cerevisiae GN=DNM1 PE=1 SV=1 - [DNM1_YEAST]	3.57	2	1.17959	0.108341	0.18809
P23638	YGR135W	Pre9p	Proteasome component Y13 OS=Saccharomyces cerevisiae GN=PRE9 PE=1 SV=1 - [PSA4_YEAST]	7.36	2	1.04295	0.108937	0.188734
A6ZYI0	YDR226W	Adk1p	Adenylate kinase 1 OS=Saccharomyces cerevisiae (strain YJM789) GN=ADK1 PE=3 SV=1 - [KAD1_YEAS7]	23.42	3	0.818206	0.109575	0.18945
P16474	YJL034W	Kar2p	78 kDa glucose-regulated protein homolog OS=Saccharomyces cerevisiae GN=KAR2 PE=1 SV=1 - [GRP78_YEAST]	13.05	7	1.10229	0.111273	0.191895
P54885	YOR323C	Pro2p	Gamma-glutamyl phosphate reductase OS=Saccharomyces cerevisiae GN=PRO2 PE=1 SV=1 - [PROA_YEAST]	3.95	2	0.879517	0.111445	0.191895
P06367	YCR031C	Rps14Ap	40S ribosomal protein S14-A OS=Saccharomyces cerevisiae GN=RPS14A PE=1 SV=5 - [RS14A_YEAST]	46.72	5	0.918407	0.11204	0.192525
P32347	YDR047W	Hem12p	Uroporphyrinogen decarboxylase OS=Saccharomyces cerevisiae GN=HEM12 PE=1 SV=1 - [DCUP_YEAST]	4.97	2	1.29577	0.112461	0.192855
P47116	YJR059W	Ptk2p	Serine/threonine-protein kinase PTK2/STK2 OS=Saccharomyces cerevisiae GN=PTK2 PE=1 SV=1 - [PTK2_YEAST]	7.46	3	1.12451	0.112911	0.193235
P07342	YMR108W	Ilv2p	Acetolactate synthase catalytic subunit, mitochondrial OS=Saccharomyces cerevisiae GN=ILV2 PE=1 SV=1 - [ILVB_YEAST]	6.55	3	0.877258	0.113515	0.193873
P32916	YDR292C	Srp101p	Signal recognition particle receptor subunit alpha homolog OS=Saccharomyces cerevisiae GN=SRP101 PE=1 SV=2 - [SRPR_YEAST]	4.35	2	0.844767	0.113929	0.194186
P0C0W9	YPR102C	Rpl11Ap	60S ribosomal protein L11-A OS=Saccharomyces cerevisiae GN=RPL11A PE=1 SV=2 - [RL11A_YEAST]	11.49	3	0.878154	0.117553	0.198827
P53312	YGR244C	Lsc2p	Succinyl-CoA ligase [ADP-forming] subunit beta, mitochondrial OS=Saccharomyces cerevisiae GN=LSC2 PE=1 SV=1 - [SUCB_YEAST]	9.6	3	1.19519	0.117692	0.198827
P46990	YJL177W	Rpl17Bp	60S ribosomal protein L17-B OS=Saccharomyces cerevisiae GN=RPL17B PE=1 SV=2 - [RL17B_YEAST]	29.89	4	0.811261	0.117748	0.198827
P05738	YGL147C	Rpl9Ap	60S ribosomal protein L9-A OS=Saccharomyces cerevisiae GN=RPL9A PE=1 SV=2 - [RL9A_YEAST]	23.56	5	1.0573	0.11782	0.198827
P32454	YKL157W	Ape2p	Aminopeptidase 2, mitochondrial OS=Saccharomyces cerevisiae GN=APE2 PE=1 SV=3 - [APE2_YEAST]	4.6	3	1.30777	0.117832	0.198827
Q6Q547	YHR072W-A	Nop10p	H/ACA ribonucleoprotein complex subunit 3 OS=Saccharomyces cerevisiae GN=NOP10 PE=1 SV=1 - [NOP10_YEAST]	22.41	1	0.337226	0.11842	0.199046
P00431	YKR066C	Ccp1p	Cytochrome c peroxidase, mitochondrial OS=Saccharomyces cerevisiae GN=CCP1 PE=1 SV=2 - [CCPR_YEAST]	7.2	2	1.19975	0.118435	0.199046
Q06217	YLR275W	Smd2p	Small nuclear ribonucleoprotein Sm D2 OS=Saccharomyces cerevisiae GN=SMD2 PE=1 SV=2 - [SMD2_YEAST]	9.09	1	1.08094	0.118978	0.199561
P00958	YGR264C	Mes1p	Methionyl-tRNA synthetase, cytoplasmic OS=Saccharomyces cerevisiae GN=MES1 PE=1 SV=4 - [SYMC_YEAST]	9.45	6	1.09502	0.119705	0.200381
P38821	YHR113W	Yhr113Wp	Putative aspartyl aminopeptidase OS=Saccharomyces cerevisiae GN=YHR113W PE=1 SV=1 - [DNPEP_YEAST]	7.55	3	1.14279	0.12035	0.201061
P32908	YFL008W	Smc1p	Structural maintenance of chromosomes protein 1 OS=Saccharomyces cerevisiae GN=SMC1 PE=1 SV=1 - [SMC1_YEAST]	0.82	1	0.552056	0.120631	0.20113
P41911	YOL059W	Gpd2p	Glycerol-3-phosphate dehydrogenase [NAD+] 2, mitochondrial OS=Saccharomyces cerevisiae GN=GPD2 PE=1 SV=2 - [GPD2_YEAST]	13.64	4	0.885071	0.122207	0.203356
P38144	YBR245C	Isw1p	ISWI chromatin-remodeling complex ATPase ISW1 OS=Saccharomyces cerevisiae GN=ISW1 PE=1 SV=2 - [ISW1_YEAST]	0.97	1	0.929939	0.123032	0.204236
Q02795	YMR149W	Swp1p	Dolichyl-diphosphooligosaccharide--protein glycosyltransferase subunit SWP1 OS=Saccharomyces cerevisiae GN=SWP1 PE=1 SV=1 - [OSTD_YEAST]	5.59	1	1.22992	0.123221	0.204236
P16649	YCR084C	Tup1p	General transcriptional corepressor TUP1 OS=Saccharomyces cerevisiae GN=TUP1 PE=1 SV=2 - [TUP1_YEAST]	5.19	2	1.35216	0.123852	0.204878
P07246	YMR083W	Adh3p	Alcohol dehydrogenase 3, mitochondrial OS=Saccharomyces cerevisiae GN=ADH3 PE=1 SV=2 - [ADH3_YEAST]	13.6	3	1.30549	0.124532	0.205398
P05747	YFR032C-A	Rpl29p	60S ribosomal protein L29 OS=Saccharomyces cerevisiae GN=RPL29 PE=1 SV=3 - [RL29_YEAST]	18.64	2	1.27612	0.124654	0.205398
P53221	YGR034W	Rpl26Bp	60S ribosomal protein L26-B OS=Saccharomyces cerevisiae GN=RPL26B PE=1 SV=2 - [RL26B_YEAST]	37.01	7	0.864363	0.124897	0.205398
P43609	YFR037C	Rsc8p	Chromatin structure-remodeling complex protein RSC8 OS=Saccharomyces cerevisiae GN=RSC8 PE=1 SV=1 - [RSC8_YEAST]	5.92	3	0.768306	0.125171	0.205447
P53912	YNL134C	Ynl134Cp	Uncharacterized protein YNL134C OS=Saccharomyces cerevisiae GN=YNL134C PE=1 SV=1 - [YNN4_YEAST]	3.19	1	1.28892	0.127836	0.209412
P39741	YDL191W	Rpl35Ap	60S ribosomal protein L35 OS=Saccharomyces cerevisiae GN=RPL35A PE=1 SV=1 - [RL35_YEAST]	35	4	1.10158	0.128761	0.210347
Q05998	YLR237W	Thi7p	Thiamine transporter OS=Saccharomyces cerevisiae GN=THI7 PE=1 SV=1 - [THI7_YEAST]	2.68	1	0.620177	0.128906	0.210347
P36059	YKL151C	Ykl151Cp	Uncharacterized protein YKL151C OS=Saccharomyces cerevisiae GN=YKL151C PE=1 SV=1 - [YKP1_YEAST]	5.34	1	1.34619	0.129295	0.210574
P22515	YKL210W	Uba1p	Ubiquitin-activating enzyme E1 1 OS=Saccharomyces cerevisiae GN=UBA1 PE=1 SV=2 - [UBA1_YEAST]	5.08	4	1.13682	0.135365	0.220034
P15703	YGR282C	Bgl2p	Glucan 1,3-beta-glucosidase OS=Saccharomyces cerevisiae GN=BGL2 PE=1 SV=1 - [BGL2_YEAST]	9.58	2	1.13745	0.135892	0.220465
P18962	YHR028C	Dap2p	Dipeptidyl aminopeptidase B OS=Saccharomyces cerevisiae GN=DAP2 PE=1 SV=2 - [DAP2_YEAST]	0.98	1	1.21241	0.138869	0.224861
P26784	YIL133C	Rpl16Ap	60S ribosomal protein L16-A OS=Saccharomyces cerevisiae GN=RPL16A PE=1 SV=3 - [RL16A_YEAST]	19.6	5	0.881645	0.139747	0.225849
P35844	YPL145C	Kes1p	Protein KES1 OS=Saccharomyces cerevisiae GN=KES1 PE=1 SV=1 - [KES1_YEAST]	2.53	1	0.981614	0.141474	0.228202
P07245	YGR204W	Ade3p	C-1-tetrahydrofolate synthase, cytoplasmic OS=Saccharomyces cerevisiae GN=ADE3 PE=1 SV=1 - [C1TC_YEAST]	10.57	8	1.14487	0.141836	0.228347
Q04338	YMR197C	Vti1p	t-SNARE VTI1 OS=Saccharomyces cerevisiae GN=VTI1 PE=1 SV=3 - [VTI1_YEAST]	6.45	1	0.641204	0.143969	0.23099
P29547	YPL048W	Cam1p	Elongation factor 1-gamma 1 OS=Saccharomyces cerevisiae GN=CAM1 PE=1 SV=2 - [EF1G1_YEAST]	6.99	3	1.10043	0.144026	0.23099
P09457	YDR298C	Atp5p	ATP synthase subunit 5, mitochondrial OS=Saccharomyces cerevisiae GN=ATP5 PE=1 SV=1 - [ATPO_YEAST]	13.21	2	0.78986	0.144423	0.231186
P36008	YKL081W	Tef4p	Elongation factor 1-gamma 2 OS=Saccharomyces cerevisiae GN=TEF4 PE=1 SV=1 - [EF1G2_YEAST]	4.37	2	0.870841	0.145389	0.232292
P25294	YNL007C	Sis1p	Protein SIS1 OS=Saccharomyces cerevisiae GN=SIS1 PE=1 SV=1 - [SIS1_YEAST]	9.38	3	0.831873	0.145813	0.232503
P43616	YFR044C	Dug1p	Cys-Gly metallodipeptidase DUG1 OS=Saccharomyces cerevisiae GN=DUG1 PE=1 SV=1 - [DUG1_YEAST]	2.91	1	1.44292	0.146331	0.232503
P47190	YOR321W	Pmt3p	Dolichyl-phosphate-mannose--protein mannosyltransferase 3 OS=Saccharomyces cerevisiae GN=PMT3 PE=1 SV=2 - [PMT3_YEAST]	4.38	3	0.816539	0.14635	0.232503
Q01159	YGL130W	Ceg1p	mRNA-capping enzyme subunit alpha OS=Saccharomyces cerevisiae GN=CEG1 PE=1 SV=2 - [MCE1_YEAST]	2.18	1	0.832193	0.148412	0.235336
B3LI22	YGR214W	Rps0Ap	40S ribosomal protein S0-A OS=Saccharomyces cerevisiae (strain RM11-1a) GN=RPS0A PE=3 SV=1 - [RSSA1_YEAS1]	10.71	3	0.911744	0.14964	0.236836
P39962	YER123W	Yck3p	Casein kinase I homolog 3 OS=Saccharomyces cerevisiae GN=YCK3 PE=1 SV=2 - [KC13_YEAST]	2.48	1	1.15852	0.150131	0.237167
P13298	YML106W	Ura5p	Orotate phosphoribosyltransferase 1 OS=Saccharomyces cerevisiae GN=URA5 PE=1 SV=2 - [PYRE_YEAST]	8.85	2	0.782375	0.150719	0.237651
P38264	YBR106W	Pho88p	Inorganic phosphate transport protein PHO88 OS=Saccharomyces cerevisiae GN=PHO88 PE=1 SV=1 - [PHO88_YEAST]	11.7	2	1.12523	0.15128	0.238089
P38328	YBR234C	Arc40p	Actin-related protein 2/3 complex subunit 1 OS=Saccharomyces cerevisiae GN=ARC40 PE=1 SV=1 - [ARPC1_YEAST]	3.13	1	1.10285	0.15325	0.24074
P53909	YNL141W	Aah1p	Adenosine deaminase OS=Saccharomyces cerevisiae GN=AAH1 PE=1 SV=1 - [ADA_YEAST]	6.05	2	0.9319	0.154541	0.242315
P38011	YMR116C	Asc1p	Guanine nucleotide-binding protein subunit beta-like protein OS=Saccharomyces cerevisiae GN=ASC1 PE=1 SV=4 - [GBLP_YEAST]	23.51	4	1.16699	0.156182	0.244433
Q02326	YML073C	Rpl6Ap	60S ribosomal protein L6-A OS=Saccharomyces cerevisiae GN=RPL6A PE=1 SV=2 - [RL6A_YEAST]	23.3	3	0.884787	0.158989	0.248365
P15367	YIR022W	Sec11p	Signal peptidase complex catalytic subunit SEC11 OS=Saccharomyces cerevisiae GN=SEC11 PE=1 SV=2 - [SEC11_YEAST]	8.38	1	1.49897	0.159353	0.248473
P31116	YJR139C	Hom6p	Homoserine dehydrogenase OS=Saccharomyces cerevisiae GN=HOM6 PE=1 SV=1 - [DHOM_YEAST]	11.98	4	1.08203	0.159929	0.24891
P53128	YGL125W	Met13p	Methylenetetrahydrofolate reductase 2 OS=Saccharomyces cerevisiae GN=MET13 PE=1 SV=2 - [MTHR2_YEAST]	7	3	1.12136	0.161311	0.250597
P22276	YOR207C	Ret1p	DNA-directed RNA polymerase III subunit RPC2 OS=Saccharomyces cerevisiae GN=RET1 PE=1 SV=2 - [RPC2_YEAST]	1.39	1	0.818972	0.163242	0.253131
P32505	YGL122C	Nab2p	Nuclear polyadenylated RNA-binding protein NAB2 OS=Saccharomyces cerevisiae GN=NAB2 PE=1 SV=1 - [NAB2_YEAST]	4	2	0.856329	0.164484	0.254588
P35176	YDR304C	Cpr5p	Peptidyl-prolyl cis-trans isomerase D OS=Saccharomyces cerevisiae GN=CPR5 PE=1 SV=1 - [CYPD_YEAST]	8.89	2	1.12459	0.165723	0.256034
Q12746	YML125C	Pga3p	Plasma membrane-associated coenzyme Q6 reductase PGA3 OS=Saccharomyces cerevisiae GN=PGA3 PE=1 SV=1 - [PGA3_YEAST]	10.58	2	1.1276	0.169911	0.261921
P38758	YHR009C	Yhr009Cp	UPF0673 membrane protein YHR009C OS=Saccharomyces cerevisiae GN=YHR009C PE=1 SV=2 - [YHG9_YEAST]	4.78	2	1.10069	0.170155	0.261921
P16120	YCR053W	Thr4p	Threonine synthase OS=Saccharomyces cerevisiae GN=THR4 PE=1 SV=1 - [THRC_YEAST]	9.53	3	1.10563	0.171951	0.264202
P38219	YBR025C	Ola1p	Uncharacterized GTP-binding protein OLA1 OS=Saccharomyces cerevisiae GN=OLA1 PE=1 SV=1 - [OLA1_YEAST]	17.01	3	1.14846	0.173435	0.265997
P32827	YPR132W	Rps23Ap	40S ribosomal protein S23 OS=Saccharomyces cerevisiae GN=RPS23A PE=1 SV=1 - [RS23_YEAST]	7.59	1	1.16351	0.177599	0.271511
Q01476	YOR124C	Ubp2p	Ubiquitin carboxyl-terminal hydrolase 2 OS=Saccharomyces cerevisiae GN=UBP2 PE=1 SV=2 - [UBP2_YEAST]	0.79	1	1.11835	0.177675	0.271511
P38137	YBR222C	Pcs60p	Peroxisomal-coenzyme A synthetase OS=Saccharomyces cerevisiae GN=PCS60 PE=1 SV=1 - [FAT2_YEAST]	2.03	1	1.09713	0.178967	0.272989
P32899	YHR148W	Imp3p	U3 small nucleolar ribonucleoprotein protein IMP3 OS=Saccharomyces cerevisiae GN=IMP3 PE=1 SV=1 - [IMP3_YEAST]	4.37	1	1.08538	0.180572	0.27494
P21264	YOR128C	Ade2p	Phosphoribosylaminoimidazole carboxylase OS=Saccharomyces cerevisiae GN=ADE2 PE=1 SV=1 - [PUR6_YEAST]	3.15	1	0.897091	0.182756	0.277762
Q03529	YMR272C	Scs7p	Ceramide very long chain fatty acid hydroxylase SCS7 OS=Saccharomyces cerevisiae GN=SCS7 PE=1 SV=1 - [SCS7_YEAST]	5.21	3	1.1245	0.184199	0.279452
P32496	YFR052W	Rpn12p	26S proteasome regulatory subunit RPN12 OS=Saccharomyces cerevisiae GN=RPN12 PE=1 SV=3 - [RPN12_YEAST]	3.65	1	0.939846	0.185574	0.280538
P34760	YML028W	Tsa1p	Peroxiredoxin TSA1 OS=Saccharomyces cerevisiae GN=TSA1 PE=1 SV=3 - [TSA1_YEAST]	26.02	4	0.94539	0.185581	0.280538
P49626	YDR012W	Rpl4Bp	60S ribosomal protein L4-B OS=Saccharomyces cerevisiae GN=RPL4B PE=1 SV=2 - [RL4B_YEAST]	30.39	10	0.947113	0.187617	0.283107
P15108	YMR186W	Hsc82p	ATP-dependent molecular chaperone HSC82 OS=Saccharomyces cerevisiae GN=HSC82 PE=1 SV=4 - [HSC82_YEAST]	12.62	8	0.82321	0.188055	0.28326
A6ZT02	YHR092C	Hxt4p	Low-affinity glucose transporter HXT4 OS=Saccharomyces cerevisiae (strain YJM789) GN=HXT4 PE=3 SV=1 - [HXT4_YEAS7]	1.74	1	0.890139	0.18856	0.283514
P07264	YGL009C	Leu1p	3-isopropylmalate dehydratase OS=Saccharomyces cerevisiae GN=LEU1 PE=1 SV=3 - [LEUC_YEAST]	9.37	5	0.913378	0.19291	0.289537
P33330	YOR184W	Ser1p	Phosphoserine aminotransferase OS=Saccharomyces cerevisiae GN=SER1 PE=1 SV=1 - [SERC_YEAST]	6.84	2	0.909913	0.19385	0.29043
P39730	YAL035W	Fun12p	Eukaryotic translation initiation factor 5B OS=Saccharomyces cerevisiae GN=FUN12 PE=1 SV=2 - [IF2P_YEAST]	2.5	2	0.954024	0.194861	0.291426
P38903	YOR014W	Rts1p	Serine/threonine-protein phosphatase 2A 56 kDa regulatory subunit delta isoform OS=Saccharomyces cerevisiae GN=RTS1 PE=1 SV=2 - [2A5D_YEAST]	3.17	2	0.816674	0.200058	0.298668
P29509	YDR353W	Trr1p	Thioredoxin reductase 1 OS=Saccharomyces cerevisiae GN=TRR1 PE=1 SV=3 - [TRXB1_YEAST]	11.29	3	1.14834	0.201033	0.299592
P41811	YGL137W	Sec27p	Coatomer subunit beta' OS=Saccharomyces cerevisiae GN=SEC27 PE=1 SV=1 - [COPB2_YEAST]	1.35	1	1.16451	0.20336	0.302525
P40474	YIL121W	Qdr2p	Quinidine resistance protein 2 OS=Saccharomyces cerevisiae GN=QDR2 PE=1 SV=1 - [QDR2_YEAST]	3.14	1	0.746841	0.205094	0.304566
P47035	YJL076W	Net1p	Nucleolar protein NET1 OS=Saccharomyces cerevisiae GN=NET1 PE=1 SV=1 - [NET1_YEAST]	0.67	1	0.847216	0.212688	0.315287
P38061	YBL092W	Rpl32p	60S ribosomal protein L32 OS=Saccharomyces cerevisiae GN=RPL32 PE=1 SV=1 - [RL32_YEAST]	15.38	2	1.07171	0.213093	0.315333
P14742	YKL104C	Gfa1p	Glucosamine--fructose-6-phosphate aminotransferase [isomerizing] OS=Saccharomyces cerevisiae GN=GFA1 PE=1 SV=4 - [GFA1_YEAST]	7.25	3	0.910991	0.214282	0.316536
P06633	YOR202W	His3p	Imidazoleglycerol-phosphate dehydratase OS=Saccharomyces cerevisiae GN=HIS3 PE=1 SV=2 - [HIS7_YEAST]	17.27	2	1.06961	0.217361	0.320273
P38998	YIR034C	Lys1p	Saccharopine dehydrogenase [NAD+, L-lysine-forming] OS=Saccharomyces cerevisiae GN=LYS1 PE=1 SV=3 - [LYS1_YEAST]	13.94	3	1.21938	0.217572	0.320273
P38988	YDL198C	Yhm1p	Putative mitochondrial carrier protein YHM1/SHM1 OS=Saccharomyces cerevisiae GN=YHM1 PE=1 SV=1 - [YHM1_YEAST]	4	1	1.17046	0.219521	0.322577
P43593	YFR010W	Ubp6p	Ubiquitin carboxyl-terminal hydrolase 6 OS=Saccharomyces cerevisiae GN=UBP6 PE=1 SV=1 - [UBP6_YEAST]	3.01	1	1.07228	0.220722	0.323777
P17883	YPR189W	Ski3p	Superkiller protein 3 OS=Saccharomyces cerevisiae GN=SKI3 PE=1 SV=2 - [SKI3_YEAST]	0.91	1	1.0969	0.224487	0.328727
P39683	YOR209C	Npt1p	Nicotinate phosphoribosyltransferase OS=Saccharomyces cerevisiae GN=NPT1 PE=1 SV=3 - [NPT1_YEAST]	12.12	5	1.05422	0.226177	0.330627
P07279	YOL120C	Rpl18Ap	60S ribosomal protein L18 OS=Saccharomyces cerevisiae GN=RPL18A PE=1 SV=1 - [RL18_YEAST]	23.12	5	0.971614	0.227041	0.331314
Q05905	YLR301W	Ylr301Wp	Uncharacterized protein YLR301W OS=Saccharomyces cerevisiae GN=YLR301W PE=1 SV=1 - [YL301_YEAST]	4.92	1	1.15501	0.23482	0.342008
P47117	YJR065C	Arp3p	Actin-related protein 3 OS=Saccharomyces cerevisiae GN=ARP3 PE=1 SV=1 - [ARP3_YEAST]	4.9	2	0.890802	0.235181	0.342008
P13586	YGL167C	Pmr1p	Calcium-transporting ATPase 1 OS=Saccharomyces cerevisiae GN=PMR1 PE=1 SV=1 - [ATC1_YEAST]	4.63	3	1.16897	0.238946	0.346883
P38631	YLR342W	Fks1p	1,3-beta-glucan synthase component FKS1 OS=Saccharomyces cerevisiae GN=FKS1 PE=1 SV=2 - [FKS1_YEAST]	4.16	7	0.94343	0.242638	0.351637
B3LGZ3	YDL100C	Get3p	ATPase GET3 OS=Saccharomyces cerevisiae (strain RM11-1a) GN=GET3 PE=3 SV=1 - [GET3_YEAS1]	11.86	3	1.1739	0.243115	0.351723
P18408	YPR167C	Met16p	Phosphoadenosine phosphosulfate reductase OS=Saccharomyces cerevisiae GN=MET16 PE=1 SV=2 - [MET16_YEAST]	8.05	1	0.87318	0.24396	0.35234
Q05911	YLR359W	Ade13p	Adenylosuccinate lyase OS=Saccharomyces cerevisiae GN=ADE13 PE=1 SV=1 - [PUR8_YEAST]	23.65	6	1.08579	0.251287	0.3623
P02365	YBR181C	Rps6Ap	40S ribosomal protein S6 OS=Saccharomyces cerevisiae GN=RPS6A PE=1 SV=1 - [RS6_YEAST]	26.27	6	0.956286	0.253308	0.364174
P38131	YBR199W	Ktr4p	Probable mannosyltransferase KTR4 OS=Saccharomyces cerevisiae GN=KTR4 PE=1 SV=1 - [KTR4_YEAST]	4.53	1	1.69589	0.253452	0.364174
A6ZZY2	SCY_3392	Scy_3392p	Mitochondrial outer membrane protein SCY_3392 OS=Saccharomyces cerevisiae (strain YJM789) GN=SCY_3392 PE=3 SV=1 - [YKR18_YEAS7]	1.66	1	0.892747	0.254564	0.36515
P36069	YKL128C	Pmu1p	Probable phosphomutase PMU1 OS=Saccharomyces cerevisiae GN=PMU1 PE=1 SV=1 - [PMU1_YEAST]	7.8	2	1.14302	0.255101	0.365298
Q12055	YDL166C	Fap7p	Putative adenylate kinase FAP7 OS=Saccharomyces cerevisiae GN=FAP7 PE=1 SV=1 - [KAD6_YEAST]	8.12	1	0.926349	0.255626	0.365427
Q08745	YOR293W	Rps10Ap	40S ribosomal protein S10-A OS=Saccharomyces cerevisiae GN=RPS10A PE=1 SV=1 - [RS10A_YEAST]	31.43	7	1.05528	0.25676	0.366427
P32771	YDL168W	Sfa1p	S-(hydroxymethyl)glutathione dehydrogenase OS=Saccharomyces cerevisiae GN=SFA1 PE=1 SV=1 - [FADH_YEAST]	3.11	1	0.124802	0.258982	0.368664
P38199	YBL032W	Ybl032Wp	KH domain-containing protein YBL032W OS=Saccharomyces cerevisiae GN=YBL032W PE=1 SV=1 - [YBD2_YEAST]	4.2	1	0.837857	0.259203	0.368664
Q02821	YNL189W	Srp1p	Importin subunit alpha OS=Saccharomyces cerevisiae GN=SRP1 PE=1 SV=1 - [IMA1_YEAST]	10.7	3	1.06871	0.264702	0.37585
P17890	YNL151C	Rpc31p	DNA-directed RNA polymerase III subunit RPC7 OS=Saccharomyces cerevisiae GN=RPC31 PE=1 SV=1 - [RPC7_YEAST]	7.17	1	0.823642	0.265213	0.375942
P24279	YEL032W	Mcm3p	DNA replication licensing factor MCM3 OS=Saccharomyces cerevisiae GN=MCM3 PE=1 SV=1 - [MCM3_YEAST]	1.54	1	0.82274	0.26596	0.376368
Q12480	YPR004C	Aim45p	Probable electron transfer flavoprotein subunit alpha, mitochondrial OS=Saccharomyces cerevisiae GN=AIM45 PE=1 SV=1 - [ETFA_YEAST]	4.94	1	1.17804	0.268122	0.37879
P53199	YGL001C	Erg26p	Sterol-4-alpha-carboxylate 3-dehydrogenase, decarboxylating OS=Saccharomyces cerevisiae GN=ERG26 PE=1 SV=1 - [ERG26_YEAST]	12.89	2	1.30238	0.26941	0.379971
P15303	YPR181C	Sec23p	Protein transport protein SEC23 OS=Saccharomyces cerevisiae GN=SEC23 PE=1 SV=1 - [SEC23_YEAST]	4.04	2	1.11057	0.271158	0.381798
P37262	YCR073W-A	Sol2p	6-phosphogluconolactonase-like protein 2 OS=Saccharomyces cerevisiae GN=SOL2 PE=1 SV=2 - [SOL2_YEAST]	4.13	1	0.743793	0.273336	0.384221
P39940	YER125W	Rsp5p	E3 ubiquitin-protein ligase RSP5 OS=Saccharomyces cerevisiae GN=RSP5 PE=1 SV=1 - [RSP5_YEAST]	2.6	2	1.0605	0.273833	0.384279
Q07807	YLL013C	Puf3p	mRNA-binding protein PUF3 OS=Saccharomyces cerevisiae GN=PUF3 PE=1 SV=1 - [PUF3_YEAST]	2.5	2	0.957767	0.275149	0.385483
Q04311	YDR049W	Ydr049Wp	Zinc finger protein YDR049W OS=Saccharomyces cerevisiae GN=YDR049W PE=1 SV=1 - [YD049_YEAST]	4.59	2	0.686211	0.275768	0.385709
P35271	YDR450W	Rps18Ap	40S ribosomal protein S18 OS=Saccharomyces cerevisiae GN=RPS18A PE=1 SV=4 - [RS18_YEAST]	43.15	7	0.921127	0.277658	0.387108
P34077	YFR002W	Nic96p	Nucleoporin NIC96 OS=Saccharomyces cerevisiae GN=NIC96 PE=1 SV=2 - [NIC96_YEAST]	1.19	1	1.10204	0.277688	0.387108
P33338	YNL243W	Sla2p	Protein SLA2 OS=Saccharomyces cerevisiae GN=SLA2 PE=1 SV=4 - [SLA2_YEAST]	1.76	1	0.811071	0.280595	0.390514
P05626	YPL078C	Atp4p	ATP synthase subunit 4, mitochondrial OS=Saccharomyces cerevisiae GN=ATP4 PE=1 SV=2 - [ATPF_YEAST]	4.1	1	0.913098	0.282931	0.392987
A6ZNQ1	YOR046C	Dbp5p	ATP-dependent RNA helicase DBP5 OS=Saccharomyces cerevisiae (strain YJM789) GN=DBP5 PE=3 SV=1 - [DBP5_YEAS7]	8.09	3	0.939451	0.283305	0.392987
P47064	YJL024C	Aps3p	AP-3 complex subunit sigma OS=Saccharomyces cerevisiae GN=APS3 PE=1 SV=1 - [AP3S_YEAST]	5.67	1	1.07234	0.28511	0.39484
P32558	YGL207W	Spt16p	FACT complex subunit SPT16 OS=Saccharomyces cerevisiae GN=SPT16 PE=1 SV=1 - [SPT16_YEAST]	0.58	1	0.930025	0.287271	0.397179
P08679	YCR005C	Cit2p	Citrate synthase, peroxisomal OS=Saccharomyces cerevisiae GN=CIT2 PE=1 SV=1 - [CISY2_YEAST]	5.43	2	1.11727	0.292066	0.403147
P54780	YMR121C	Rpl15Bp	60S ribosomal protein L15-B OS=Saccharomyces cerevisiae GN=RPL15B PE=1 SV=2 - [RL15B_YEAST]	13.24	3	1.0913	0.293247	0.404114
P35723	YKL065C	Yet1p	Endoplasmic reticulum transmembrane protein 1 OS=Saccharomyces cerevisiae GN=YET1 PE=1 SV=1 - [YET1_YEAST]	4.85	1	1.12203	0.307727	0.423375
P41805	YLR075W	Rpl10p	60S ribosomal protein L10 OS=Saccharomyces cerevisiae GN=RPL10 PE=1 SV=1 - [RL10_YEAST]	35.29	7	0.936836	0.309413	0.425001
P39692	YFR030W	Met10p	Sulfite reductase [NADPH] flavoprotein component OS=Saccharomyces cerevisiae GN=MET10 PE=1 SV=2 - [MET10_YEAST]	5.12	4	1.08159	0.316276	0.433721
P32599	YDR129C	Sac6p	Fimbrin OS=Saccharomyces cerevisiae GN=SAC6 PE=1 SV=1 - [FIMB_YEAST]	5.76	3	1.0717	0.320194	0.43838
P10507	YLR163C	Mas1p	Mitochondrial-processing peptidase subunit beta OS=Saccharomyces cerevisiae GN=MAS1 PE=1 SV=1 - [MPPB_YEAST]	2.81	1	1.0753	0.321071	0.438791
P38912	YMR260C	Tif11p	Eukaryotic translation initiation factor 1A OS=Saccharomyces cerevisiae GN=TIF11 PE=1 SV=1 - [IF1A_YEAST]	12.42	1	0.689893	0.321537	0.438791
P32474	YDR518W	Eug1p	Protein disulfide-isomerase EUG1 OS=Saccharomyces cerevisiae GN=EUG1 PE=1 SV=1 - [EUG1_YEAST]	4.26	1	0.708358	0.32268	0.439638
Q02486	YMR072W	Abf2p	ARS-binding factor 2, mitochondrial OS=Saccharomyces cerevisiae GN=ABF2 PE=1 SV=1 - [ABF2_YEAST]	7.65	1	0.877651	0.32336	0.439853
P0C0W1	YJL190C	Rps22Ap	40S ribosomal protein S22-A OS=Saccharomyces cerevisiae GN=RPS22A PE=1 SV=2 - [RS22A_YEAST]	36.92	4	1.07202	0.329286	0.447191
P40525	YIL052C	Rpl34Bp	60S ribosomal protein L34-B OS=Saccharomyces cerevisiae GN=RPL34B PE=1 SV=1 - [RL34B_YEAST]	34.71	4	1.12471	0.331437	0.448736
P53008	YGL027C	Cwh41p	Mannosyl-oligosaccharide glucosidase OS=Saccharomyces cerevisiae GN=CWH41 PE=1 SV=1 - [CWH41_YEAST]	0.96	1	1.09038	0.331489	0.448736
P21954	YDL066W	Idp1p	Isocitrate dehydrogenase [NADP], mitochondrial OS=Saccharomyces cerevisiae GN=IDP1 PE=1 SV=1 - [IDHP_YEAST]	22.9	8	1.06263	0.337095	0.455374
P07280	YOL121C	Rps19Ap	40S ribosomal protein S19-A OS=Saccharomyces cerevisiae GN=RPS19A PE=1 SV=2 - [RS19A_YEAST]	12.5	3	1.04901	0.337475	0.455374
P25719	YML078W	Cpr3p	Peptidyl-prolyl cis-trans isomerase C, mitochondrial OS=Saccharomyces cerevisiae GN=CPR3 PE=1 SV=1 - [CYPC_YEAST]	4.95	1	0.923956	0.33955	0.457441
P06106	YLR303W	Met17p	Protein MET17 OS=Saccharomyces cerevisiae GN=MET17 PE=1 SV=3 - [MET17_YEAST]	15.77	5	1.03703	0.345852	0.465187
P39522	YJR016C	Ilv3p	Dihydroxy-acid dehydratase, mitochondrial OS=Saccharomyces cerevisiae GN=ILV3 PE=1 SV=2 - [ILV3_YEAST]	13.68	4	1.17131	0.346657	0.465526
Q03088	YPL032C	Svl3p	Styryl dye vacuolar localization protein 3 OS=Saccharomyces cerevisiae GN=SVL3 PE=1 SV=1 - [SVL3_YEAST]	1.45	1	0.854039	0.350843	0.470397
B3LLJ2	YML063W	Rps1Bp	40S ribosomal protein S1-B OS=Saccharomyces cerevisiae (strain RM11-1a) GN=RPS1B PE=3 SV=1 - [RS3A2_YEAS1]	45.88	11	1.07898	0.352023	0.471229
Q12496	YOL098C	Yol098Cp	Uncharacterized protein YOL098C OS=Saccharomyces cerevisiae GN=YOL098C PE=1 SV=1 - [YO098_YEAST]	1.06	1	1.19673	0.35599	0.475783
P32898	YDR430C	Cym1p	Mitochondrial presequence protease OS=Saccharomyces cerevisiae GN=CYM1 PE=1 SV=2 - [CYM1_YEAST]	1.42	1	1.11619	0.359609	0.479357
P00950	YKL152C	Gpm1p	Phosphoglycerate mutase 1 OS=Saccharomyces cerevisiae GN=GPM1 PE=1 SV=3 - [PMG1_YEAST]	48.58	13	0.951616	0.359802	0.479357
P38764	YHR027C	Rpn1p	26S proteasome regulatory subunit RPN1 OS=Saccharomyces cerevisiae GN=RPN1 PE=1 SV=3 - [RPN1_YEAST]	6.24	4	0.875826	0.361817	0.481279
P47047	YJL050W	Mtr4p	ATP-dependent RNA helicase DOB1 OS=Saccharomyces cerevisiae GN=MTR4 PE=1 SV=1 - [MTR4_YEAST]	1.21	1	1.07199	0.363758	0.482975
Q00402	YDR150W	Num1p	Nuclear migration protein NUM1 OS=Saccharomyces cerevisiae GN=NUM1 PE=1 SV=2 - [NUM1_YEAST]	2.18	1	0.886074	0.364239	0.482975
P36046	YKL195W	Mia40p	Mitochondrial intermembrane space import and assembly protein 40 OS=Saccharomyces cerevisiae GN=MIA40 PE=1 SV=2 - [MIA40_YEAST]	5.21	2	0.892317	0.367237	0.486185
P32835	YLR293C	Gsp1p	GTP-binding nuclear protein GSP1/CNR1 OS=Saccharomyces cerevisiae GN=GSP1 PE=1 SV=1 - [GSP1_YEAST]	12.33	3	1.05847	0.369652	0.488614
P32860	YKL040C	Nfu1p	NifU-like protein, mitochondrial OS=Saccharomyces cerevisiae GN=NFU1 PE=1 SV=2 - [NFU1_YEAST]	10.16	2	1.04956	0.370672	0.489195
Q01662	YLR244C	Map1p	Methionine aminopeptidase 1 OS=Saccharomyces cerevisiae GN=MAP1 PE=1 SV=2 - [AMPM1_YEAST]	27.13	6	1.04568	0.372358	0.490104
P53043	YGR123C	Ppt1p	Serine/threonine-protein phosphatase T OS=Saccharomyces cerevisiae GN=PPT1 PE=1 SV=1 - [PPT1_YEAST]	4.87	2	0.520174	0.373637	0.490104
P35182	YDL006W	Ptc1p	Protein phosphatase 2C homolog 1 OS=Saccharomyces cerevisiae GN=PTC1 PE=1 SV=1 - [PP2C1_YEAST]	5.69	1	1.24262	0.374799	0.490104
Q12458	YDR368W	Ypr1p	Putative reductase 1 OS=Saccharomyces cerevisiae GN=YPR1 PE=1 SV=1 - [YPR1_YEAST]	5.45	1	1.14573	0.374938	0.490104
P38985	YDL092W	Srp14p	Signal recognition particle subunit SRP14 OS=Saccharomyces cerevisiae GN=SRP14 PE=1 SV=1 - [SRP14_YEAST]	6.85	1	1.02328	0.375095	0.490104
P23542	YLR027C	Aat2p	Aspartate aminotransferase, cytoplasmic OS=Saccharomyces cerevisiae GN=AAT2 PE=1 SV=3 - [AATC_YEAST]	12.2	3	1.02739	0.375121	0.490104
P43590	YFR006W	Yfr006Wp	Uncharacterized peptidase YFR006W OS=Saccharomyces cerevisiae GN=YFR006W PE=1 SV=1 - [YFH6_YEAST]	4.11	2	1.29576	0.375436	0.490104
P0C0T4	YLR333C	Rps25Bp	40S ribosomal protein S25-B OS=Saccharomyces cerevisiae GN=RPS25B PE=1 SV=1 - [RS25B_YEAST]	26.85	4	0.962943	0.379502	0.494646
P29311	YER177W	Bmh1p	Protein BMH1 OS=Saccharomyces cerevisiae GN=BMH1 PE=1 SV=4 - [BMH1_YEAST]	16.1	3	1.08466	0.382735	0.498087
P49089	YPR145W	Asn1p	Asparagine synthetase [glutamine-hydrolyzing] 1 OS=Saccharomyces cerevisiae GN=ASN1 PE=1 SV=2 - [ASNS1_YEAST]	10.84	7	1.04011	0.383887	0.498816
P50623	YDL064W	Ubc9p	SUMO-conjugating enzyme UBC9 OS=Saccharomyces cerevisiae GN=UBC9 PE=1 SV=1 - [UBC9_YEAST]	8.28	2	0.915816	0.385297	0.499877
P14682	YDR054C	Cdc34p	Ubiquitin-conjugating enzyme E2-34 kDa OS=Saccharomyces cerevisiae GN=CDC34 PE=1 SV=1 - [UBC3_YEAST]	6.1	1	0.745735	0.387319	0.501727
P02557	YFL037W	Tub2p	Tubulin beta chain OS=Saccharomyces cerevisiae GN=TUB2 PE=1 SV=2 - [TBB_YEAST]	5.03	2	0.96642	0.388355	0.502297
P89886	YER007C-A	Tma20p	Translation machinery-associated protein 20 OS=Saccharomyces cerevisiae GN=TMA20 PE=1 SV=1 - [TMA20_YEAST]	19.89	2	1.03591	0.393162	0.507733
Q07793	YDR365W-B	Ty1Bp	Transposon Ty1-DR4 Gag-Pol polyprotein OS=Saccharomyces cerevisiae GN=TY1B-DR4 PE=3 SV=2 - [YD13B_YEAST]	2.56	4	1.04593	0.394361	0.508503
P32610	YEL051W	Vma8p	V-type proton ATPase subunit D OS=Saccharomyces cerevisiae GN=VMA8 PE=1 SV=1 - [VATD_YEAST]	4.69	1	1.04777	0.396809	0.510698
P40016	YER021W	Rpn3p	26S proteasome regulatory subunit RPN3 OS=Saccharomyces cerevisiae GN=RPN3 PE=1 SV=5 - [RPN3_YEAST]	1.15	1	0.877927	0.397449	0.510698
P47137	YJR096W	Yjr096Wp	Uncharacterized oxidoreductase YJR096W OS=Saccharomyces cerevisiae GN=YJR096W PE=1 SV=1 - [YJ66_YEAST]	8.51	2	1.09652	0.397884	0.510698
P38237	YBR058C	Ubp14p	Ubiquitin carboxyl-terminal hydrolase 14 OS=Saccharomyces cerevisiae GN=UBP14 PE=1 SV=2 - [UBP14_YEAST]	2.05	1	0.779761	0.403836	0.517549
P47124	YJR075W	Hoc1p	Putative glycosyltransferase HOC1 OS=Saccharomyces cerevisiae GN=HOC1 PE=1 SV=3 - [HOC1_YEAST]	4.29	1	1.07026	0.410187	0.524191
P14832	YDR155C	Cpr1p	Peptidyl-prolyl cis-trans isomerase OS=Saccharomyces cerevisiae GN=CPR1 PE=1 SV=3 - [CYPH_YEAST]	24.07	3	0.935021	0.410372	0.524191
P00817	YBR011C	Ipp1p	Inorganic pyrophosphatase OS=Saccharomyces cerevisiae GN=IPP1 PE=1 SV=4 - [IPYR_YEAST]	28.57	5	0.865348	0.410886	0.524191
Q03558	YHR179W	Oye2p	NADPH dehydrogenase 2 OS=Saccharomyces cerevisiae GN=OYE2 PE=1 SV=3 - [OYE2_YEAST]	20.25	10	0.971279	0.416525	0.53058
P40482	YIL109C	Sec24p	Protein transport protein SEC24 OS=Saccharomyces cerevisiae GN=SEC24 PE=1 SV=1 - [SEC24_YEAST]	1.51	1	0.930345	0.420998	0.535194
P18544	YOL140W	Arg8p	Acetylornithine aminotransferase, mitochondrial OS=Saccharomyces cerevisiae GN=ARG8 PE=1 SV=1 - [ARGD_YEAST]	2.6	1	1.03303	0.421417	0.535194
A6ZKU1	YBL007C	Sla1p	Actin cytoskeleton-regulatory complex protein SLA1 OS=Saccharomyces cerevisiae (strain YJM789) GN=SLA1 PE=3 SV=1 - [SLA1_YEAS7]	1.77	2	1.08176	0.423597	0.536406
P10964	YOR341W	Rpa1p	DNA-directed RNA polymerase I subunit RPA1 OS=Saccharomyces cerevisiae GN=RPA1 PE=1 SV=2 - [RPA1_YEAST]	3.49	6	0.933164	0.423646	0.536406
P16370	YIL021W	Rpb3p	DNA-directed RNA polymerase II subunit RPB3 OS=Saccharomyces cerevisiae GN=RPB3 PE=1 SV=2 - [RPB3_YEAST]	5.66	1	1.1627	0.431609	0.545053
Q01217	YER069W	Arg5p	Protein ARG5,6, mitochondrial OS=Saccharomyces cerevisiae GN=ARG5,6 PE=1 SV=1 - [ARG56_YEAST]	4.29	2	0.940939	0.43177	0.545053
P07991	YLR438W	Car2p	Ornithine aminotransferase OS=Saccharomyces cerevisiae GN=CAR2 PE=1 SV=2 - [OAT_YEAST]	6.37	2	0.96457	0.432771	0.545499
P38167	YBL101C	Ecm21p	Protein ECM21 OS=Saccharomyces cerevisiae GN=ECM21 PE=1 SV=2 - [ECM21_YEAST]	1.16	1	1.02664	0.439219	0.552799
P27514	YNR013C	Ynr013Cp	Uncharacterized transporter YNR013C OS=Saccharomyces cerevisiae GN=YNR013C PE=1 SV=2 - [YN86_YEAST]	1.45	1	0.949877	0.446202	0.560749
P19358	YDR502C	Sam2p	S-adenosylmethionine synthase 2 OS=Saccharomyces cerevisiae GN=SAM2 PE=1 SV=3 - [METK2_YEAST]	14.84	3	0.347755	0.452302	0.567569
P06169	YLR044C	Pdc1p	Pyruvate decarboxylase isozyme 1 OS=Saccharomyces cerevisiae GN=PDC1 PE=1 SV=7 - [PDC1_YEAST]	22.2	11	0.963924	0.456336	0.571347
P38701	YHL015W	Rps20p	40S ribosomal protein S20 OS=Saccharomyces cerevisiae GN=RPS20 PE=1 SV=3 - [RS20_YEAST]	41.32	4	1.05534	0.45667	0.571347
P38999	YNR050C	Lys9p	Saccharopine dehydrogenase [NADP+, L-glutamate-forming] OS=Saccharomyces cerevisiae GN=LYS9 PE=1 SV=1 - [LYS9_YEAST]	12.78	4	0.93826	0.461505	0.576085
P07259	YJL130C	Ura2p	Protein URA1 OS=Saccharomyces cerevisiae GN=URA2 PE=1 SV=4 - [PYR1_YEAST]	4.88	10	1.04701	0.46208	0.576085
P53314	YGR247W	Cpd1p	2',3'-cyclic-nucleotide 3'-phosphodiesterase OS=Saccharomyces cerevisiae GN=CPD1 PE=1 SV=1 - [CPD1_YEAST]	6.69	2	1.0879	0.46251	0.576085
P40054	YER081W	Ser3p	D-3-phosphoglycerate dehydrogenase 1 OS=Saccharomyces cerevisiae GN=SER3 PE=1 SV=1 - [SERA_YEAST]	7.68	3	1.29353	0.465056	0.578401
P52910	YLR153C	Acs2p	Acetyl-coenzyme A synthetase 2 OS=Saccharomyces cerevisiae GN=ACS2 PE=1 SV=1 - [ACS2_YEAST]	22.25	11	1.04834	0.467402	0.580461
P32466	YDR345C	Hxt3p	Low-affinity glucose transporter HXT3 OS=Saccharomyces cerevisiae GN=HXT3 PE=1 SV=1 - [HXT3_YEAST]	7.41	2	1.24048	0.474977	0.588999
P08518	YOR151C	Rpb2p	DNA-directed RNA polymerase II subunit RPB2 OS=Saccharomyces cerevisiae GN=RPB2 PE=1 SV=2 - [RPB2_YEAST]	0.82	1	0.968366	0.494011	0.611702
P02829	YPL240C	Hsp82p	ATP-dependent molecular chaperone HSP82 OS=Saccharomyces cerevisiae GN=HSP82 PE=1 SV=1 - [HSP82_YEAST]	12.41	8	1.05926	0.494937	0.611948
Q08217	YOL045W	Yol045Wp	Probable serine/threonine-protein kinase YOL045W OS=Saccharomyces cerevisiae GN=YOL045W PE=1 SV=1 - [KOE5_YEAST]	1.82	2	0.931308	0.496991	0.613588
P07806	YGR094W	Vas1p	Valyl-tRNA synthetase, mitochondrial OS=Saccharomyces cerevisiae GN=VAS1 PE=1 SV=2 - [SYV_YEAST]	11.05	9	0.942627	0.501285	0.617983
P05750	YNL178W	Rps3p	40S ribosomal protein S3 OS=Saccharomyces cerevisiae GN=RPS3 PE=1 SV=5 - [RS3_YEAST]	13.33	4	0.976892	0.504674	0.621251
P53184	YGL037C	Pnc1p	Nicotinamidase OS=Saccharomyces cerevisiae GN=PNC1 PE=1 SV=1 - [PNC1_YEAST]	30.09	3	0.921412	0.506085	0.622078
P39958	YER136W	Gdi1p	Rab GDP-dissociation inhibitor OS=Saccharomyces cerevisiae GN=GDI1 PE=1 SV=1 - [GDI1_YEAST]	11.31	2	1.5908	0.511798	0.627788
P36013	YKL029C	Mae1p	NAD-dependent malic enzyme, mitochondrial OS=Saccharomyces cerevisiae GN=MAE1 PE=1 SV=1 - [MAOM_YEAST]	14.35	5	0.911689	0.512221	0.627788
P52893	YLR089C	Alt1p	Probable alanine aminotransferase, mitochondrial OS=Saccharomyces cerevisiae GN=ALT1 PE=1 SV=1 - [ALAM_YEAST]	6.76	2	1.08264	0.514772	0.629998
A6ZSX1	YHR065C	Rrp3p	ATP-dependent rRNA helicase RRP3 OS=Saccharomyces cerevisiae (strain YJM789) GN=RRP3 PE=3 SV=1 - [RRP3_YEAS7]	2.2	1	0.871675	0.518552	0.632502
P53228	YGR043C	Nqm1p	Transaldolase NQM1 OS=Saccharomyces cerevisiae GN=NQM1 PE=1 SV=1 - [TAL2_YEAST]	3.3	1	0.951885	0.518977	0.632502
P06168	YLR355C	Ilv5p	Ketol-acid reductoisomerase, mitochondrial OS=Saccharomyces cerevisiae GN=ILV5 PE=1 SV=1 - [ILV5_YEAST]	34.43	9	1.02972	0.519072	0.632502
P38689	YHL011C	Prs3p	Ribose-phosphate pyrophosphokinase 3 OS=Saccharomyces cerevisiae GN=PRS3 PE=1 SV=1 - [KPR3_YEAST]	5.31	1	0.561792	0.520784	0.633671
P22470	YDR143C	San1p	Protein SAN1 OS=Saccharomyces cerevisiae GN=SAN1 PE=1 SV=1 - [SAN1_YEAST]	1.48	1	0.933627	0.522369	0.634681
P04911	YDR225W	Hta1p	Histone H2A.1 OS=Saccharomyces cerevisiae GN=HTA1 PE=1 SV=2 - [H2A1_YEAST]	10.61	1	0.80216	0.524477	0.636325
P39938	YGL189C	Rps26Ap	40S ribosomal protein S26-A OS=Saccharomyces cerevisiae GN=RPS26A PE=1 SV=1 - [RS26A_YEAST]	9.24	1	0.926861	0.532338	0.644933
P50109	YML017W	Psp2p	Protein PSP2 OS=Saccharomyces cerevisiae GN=PSP2 PE=1 SV=2 - [PSP2_YEAST]	2.7	1	0.943104	0.533623	0.645561
P32784	YBL011W	Gpt1p	Glycerol-3-phosphate O-acyltransferase 1 OS=Saccharomyces cerevisiae GN=GPT1 PE=1 SV=3 - [GPT1_YEAST]	1.71	1	1.0867	0.535255	0.646108
P43619	YFR047C	Bna6p	Nicotinate-nucleotide pyrophosphorylase [carboxylating] OS=Saccharomyces cerevisiae GN=BNA6 PE=1 SV=1 - [NADC_YEAST]	3.39	1	0.967351	0.537512	0.646108
Q12363	YOR230W	Wtm1p	Transcriptional modulator WTM1 OS=Saccharomyces cerevisiae GN=WTM1 PE=1 SV=1 - [WTM1_YEAST]	8.24	3	0.953491	0.53767	0.646108
P31382	YAL023C	Pmt2p	Dolichyl-phosphate-mannose--protein mannosyltransferase 2 OS=Saccharomyces cerevisiae GN=PMT2 PE=1 SV=2 - [PMT2_YEAST]	7.11	4	0.947092	0.537809	0.646108
Q08972	YPL226W	New1p	[NU+] prion formation protein 1 OS=Saccharomyces cerevisiae GN=NEW1 PE=1 SV=1 - [NEW1_YEAST]	3.43	4	1.02377	0.537912	0.646108
P26637	YPL160W	Cdc60p	Leucyl-tRNA synthetase, cytoplasmic OS=Saccharomyces cerevisiae GN=CDC60 PE=1 SV=1 - [SYLC_YEAST]	8.53	6	1.06683	0.538965	0.646451
P06102	YIL038C	Not3p	General negative regulator of transcription subunit 3 OS=Saccharomyces cerevisiae GN=NOT3 PE=1 SV=2 - [NOT3_YEAST]	1.32	1	1.03841	0.539733	0.646451
P40347	YPR073C	Ltp1p	Low molecular weight phosphotyrosine protein phosphatase OS=Saccharomyces cerevisiae GN=LTP1 PE=1 SV=1 - [PPAL_YEAST]	13.04	1	0.942626	0.552256	0.660511
P38145	YBR256C	Rib5p	Riboflavin synthase alpha chain OS=Saccharomyces cerevisiae GN=RIB5 PE=1 SV=1 - [RISA_YEAST]	13.03	2	1.05834	0.553269	0.660783
B3RHV0	YLR441C	Rps1Ap	40S ribosomal protein S1-A OS=Saccharomyces cerevisiae (strain RM11-1a) GN=RPS1A PE=3 SV=1 - [RS3A1_YEAS1]	45.49	11	1.03714	0.561493	0.669656
P40483	YIL108W	Yil108Wp	Putative zinc metalloproteinase YIL108W OS=Saccharomyces cerevisiae GN=YIL108W PE=1 SV=1 - [YIK8_YEAST]	3.45	2	0.957271	0.568125	0.675203
P54783	YML086C	Alo1p	D-arabinono-1,4-lactone oxidase OS=Saccharomyces cerevisiae GN=ALO1 PE=1 SV=1 - [ALO_YEAST]	6.84	2	0.944861	0.568866	0.675203
Q05016	YMR226C	Ymr226Cp	Uncharacterized oxidoreductase YMR226C OS=Saccharomyces cerevisiae GN=YMR226C PE=1 SV=1 - [YM71_YEAST]	14.23	2	0.850264	0.569121	0.675203
P20606	YPL218W	Sar1p	Small COPII coat GTPase SAR1 OS=Saccharomyces cerevisiae GN=SAR1 PE=1 SV=1 - [SAR1_YEAST]	4.21	1	0.955336	0.569352	0.675203
Q04371	YMR027W	Ymr027Wp	UPF0364 protein YMR027W OS=Saccharomyces cerevisiae GN=YMR027W PE=1 SV=1 - [YMR7_YEAST]	4.04	2	1.02169	0.573163	0.678767
P07284	YDR023W	Ses1p	Seryl-tRNA synthetase, cytoplasmic OS=Saccharomyces cerevisiae GN=SES1 PE=1 SV=2 - [SYSC_YEAST]	5.84	2	1.02928	0.575747	0.680869
P21524	YER070W	Rnr1p	Ribonucleoside-diphosphate reductase large chain 1 OS=Saccharomyces cerevisiae GN=RNR1 PE=1 SV=2 - [RIR1_YEAST]	3.6	2	0.877472	0.589898	0.696625
P38333	YEL036C	Anp1p	Essential nuclear protein 1 OS=Saccharomyces cerevisiae GN=ENP1 PE=1 SV=1 - [ENP1_YEAST]	4.76	1	0.8826	0.591594	0.69765
Q02895	YPL088W	Ypl088Wp	Putative aryl-alcohol dehydrogenase YPL088W OS=Saccharomyces cerevisiae GN=YPL088W PE=1 SV=1 - [YP088_YEAST]	3.51	1	1.05809	0.594833	0.699738
P38708	YHR020W	Yhr020Wp	Putative prolyl-tRNA synthetase YHR020W OS=Saccharomyces cerevisiae GN=YHR020W PE=1 SV=1 - [YHI0_YEAST]	6.4	4	1.0264	0.595026	0.699738
P15424	YDR194C	Mss116p	ATP-dependent RNA helicase MSS116, mitochondrial OS=Saccharomyces cerevisiae GN=MSS116 PE=1 SV=1 - [MS116_YEAST]	6.02	3	1.04624	0.601727	0.706191
Q04739	YER027C	Gal83p	SNF1 protein kinase subunit beta-3 OS=Saccharomyces cerevisiae GN=GAL83 PE=1 SV=1 - [GAL83_YEAST]	4.32	1	0.934763	0.602192	0.706191
Q12449	YDR214W	Aha1p	Hsp90 co-chaperone AHA1 OS=Saccharomyces cerevisiae GN=AHA1 PE=1 SV=1 - [AHA1_YEAST]	3.71	1	0.940236	0.605217	0.708419
P41940	YDL055C	Mpg1p	Mannose-1-phosphate guanyltransferase OS=Saccharomyces cerevisiae GN=MPG1 PE=1 SV=2 - [MPG1_YEAST]	13.57	3	0.946864	0.606469	0.708419
P0CH08	YIL148W	Ubi1p	Ubiquitin-60S ribosomal protein L40 OS=Saccharomyces cerevisiae GN=UBI1 PE=1 SV=1 - [RL401_YEAST]	25	3	1.04369	0.606615	0.708419
P39685	YMR129W	Pom152p	Nucleoporin POM152 OS=Saccharomyces cerevisiae GN=POM152 PE=1 SV=1 - [PO152_YEAST]	0.6	1	1.04544	0.607699	0.708701
P40446	YIL165C	Yil165Cp	Putative nitrilase-like protein YIL165C OS=Saccharomyces cerevisiae GN=YIL165C PE=5 SV=1 - [YIQ5_YEAST]	9.24	1	0.938156	0.608582	0.708732
P07263	YPR033C	Hts1p	Histidyl-tRNA synthetase, mitochondrial OS=Saccharomyces cerevisiae GN=HTS1 PE=1 SV=2 - [SYH_YEAST]	2.56	1	0.963157	0.610035	0.708732
P40495	YIL094C	Lys12p	Homoisocitrate dehydrogenase, mitochondrial OS=Saccharomyces cerevisiae GN=LYS12 PE=1 SV=1 - [LYS12_YEAST]	11.32	3	0.960508	0.610251	0.708732
Q02884	YPL101W	Elp4p	Elongator complex protein 4 OS=Saccharomyces cerevisiae GN=ELP4 PE=1 SV=1 - [ELP4_YEAST]	2.41	1	1.03315	0.614079	0.712196
P21657	YIR023W	Dal81p	Transcriptional activator protein DAL81 OS=Saccharomyces cerevisiae GN=DAL81 PE=1 SV=3 - [DAL81_YEAST]	1.24	1	0.824874	0.628276	0.727659
P30619	YDR164C	Sec1p	Protein transport protein SEC1 OS=Saccharomyces cerevisiae GN=SEC1 PE=1 SV=1 - [SEC1_YEAST]	1.93	1	1.12145	0.629903	0.728541
P38630	YOR217W	Rfc1p	Replication factor C subunit 1 OS=Saccharomyces cerevisiae GN=RFC1 PE=1 SV=1 - [RFC1_YEAST]	1.39	1	0.908374	0.636926	0.735654
P31373	YAL012W	Cys3p	Cystathionine gamma-lyase OS=Saccharomyces cerevisiae GN=CYS3 PE=1 SV=2 - [CYS3_YEAST]	6.6	3	1.02729	0.640681	0.738027
P80967	YPR133W-A	Tom5p	Mitochondrial import receptor subunit TOM5 OS=Saccharomyces cerevisiae GN=TOM5 PE=1 SV=1 - [TOM5_YEAST]	16	1	0.935191	0.640893	0.738027
P23291	YHR135C	Yck1p	Casein kinase I homolog 1 OS=Saccharomyces cerevisiae GN=YCK1 PE=1 SV=1 - [KC11_YEAST]	7.06	2	1.04427	0.64161	0.738027
P12686	YGR084C	Mrp13p	37S ribosomal protein MRP13, mitochondrial OS=Saccharomyces cerevisiae GN=MRP13 PE=1 SV=2 - [RT13_YEAST]	3.24	1	1.07813	0.648677	0.745137
P09064	YPL237W	Sui3p	Eukaryotic translation initiation factor 2 subunit beta OS=Saccharomyces cerevisiae GN=SUI3 PE=1 SV=2 - [IF2B_YEAST]	11.93	2	1.11987	0.650389	0.746086
P39939	YER131W	Rps26Bp	40S ribosomal protein S26-B OS=Saccharomyces cerevisiae GN=RPS26B PE=1 SV=1 - [RS26B_YEAST]	9.24	1	1.08226	0.651363	0.746188
P40051	YER078C	Icp55p	Intermediate cleaving peptidase of 55 kDa OS=Saccharomyces cerevisiae GN=ICP55 PE=1 SV=1 - [ICP55_YEAST]	3.72	1	1.18318	0.652688	0.746286
P52917	YPR173C	Vps4p	Vacuolar protein sorting-associated protein 4 OS=Saccharomyces cerevisiae GN=VPS4 PE=1 SV=1 - [VPS4_YEAST]	6.64	2	0.954344	0.653222	0.746286
P05744	YPL143W	Rpl33Ap	60S ribosomal protein L33-A OS=Saccharomyces cerevisiae GN=RPL33A PE=1 SV=3 - [RL33A_YEAST]	15.89	2	1.0622	0.654911	0.747202
P53331	YGR276C	Rnh70p	RNA exonuclease 1 OS=Saccharomyces cerevisiae GN=RNH70 PE=1 SV=1 - [REXO1_YEAST]	2.89	1	1.04105	0.656508	0.748011
Q12672	YPL079W	Rpl21Bp	60S ribosomal protein L21-B OS=Saccharomyces cerevisiae GN=RPL21B PE=1 SV=1 - [RL21B_YEAST]	16.88	4	0.958726	0.658479	0.749242
P00498	YER055C	His1p	ATP phosphoribosyltransferase OS=Saccharomyces cerevisiae GN=HIS1 PE=1 SV=1 - [HIS1_YEAST]	3.7	1	0.976465	0.665018	0.755661
P32473	YBR221C	Pdb1p	Pyruvate dehydrogenase E1 component subunit beta, mitochondrial OS=Saccharomyces cerevisiae GN=PDB1 PE=1 SV=2 - [ODPB_YEAST]	2.73	1	1.06413	0.666898	0.756777
Q03219	YMR178W	Ymr178Wp	Uncharacterized protein YMR178W OS=Saccharomyces cerevisiae GN=YMR178W PE=1 SV=1 - [YM44_YEAST]	3.65	1	1.03106	0.667834	0.756819
P11412	YNL241C	Zwf1p	Glucose-6-phosphate 1-dehydrogenase OS=Saccharomyces cerevisiae GN=ZWF1 PE=1 SV=4 - [G6PD_YEAST]	12.87	5	0.981548	0.670142	0.758297
P54113	YLR028C	Ade16p	Bifunctional purine biosynthesis protein ADE16 OS=Saccharomyces cerevisiae GN=ADE16 PE=1 SV=1 - [PUR91_YEAST]	5.92	2	0.771432	0.671545	0.758297
P22147	YGL173C	Kem1p	5'-3' exoribonuclease 1 OS=Saccharomyces cerevisiae GN=KEM1 PE=1 SV=1 - [XRN1_YEAST]	1.96	2	1.02233	0.671841	0.758297
P07257	YPR191W	Qcr2p	Cytochrome b-c1 complex subunit 2, mitochondrial OS=Saccharomyces cerevisiae GN=QCR2 PE=1 SV=1 - [QCR2_YEAST]	7.07	2	1.09239	0.673319	0.758651
P39727	YAL042W	Erv46p	ER-derived vesicles protein ERV46 OS=Saccharomyces cerevisiae GN=ERV46 PE=1 SV=2 - [ERV46_YEAST]	2.41	1	0.95115	0.673956	0.758651
P53200	YGR001C	Aml1p	N(6)-adenine-specific DNA methyltransferase-like 1 OS=Saccharomyces cerevisiae GN=AML1 PE=1 SV=2 - [AML1_YEAST]	12.1	2	0.885356	0.682645	0.767406
P53860	YNL231C	Pdr16p	Phosphatidylinositol transfer protein PDR16 OS=Saccharomyces cerevisiae GN=PDR16 PE=1 SV=1 - [PDR16_YEAST]	8.55	2	0.762278	0.686233	0.770411
Q06440	YLR429W	Crn1p	Coronin-like protein OS=Saccharomyces cerevisiae GN=CRN1 PE=1 SV=1 - [CORO_YEAST]	10.75	4	0.970234	0.688925	0.772404
Q12523	YPL247C	Ypl247Cp	WD repeat-containing protein YPL247C OS=Saccharomyces cerevisiae GN=YPL247C PE=1 SV=1 - [YP247_YEAST]	2.49	1	0.965627	0.694256	0.777345
Q03631	YML076C	War1p	Weak acid resistance protein 1 OS=Saccharomyces cerevisiae GN=WAR1 PE=1 SV=1 - [WAR1_YEAST]	1.59	1	0.939008	0.697627	0.780083
Q06636	YDR302W	Gpi11p	Glycosylphosphatidylinositol anchor biosynthesis protein 11 OS=Saccharomyces cerevisiae GN=GPI11 PE=1 SV=1 - [GPI11_YEAST]	5.48	1	1.04083	0.699466	0.781101
Q99258	YDR487C	Rib3p	3,4-dihydroxy-2-butanone 4-phosphate synthase OS=Saccharomyces cerevisiae GN=RIB3 PE=1 SV=1 - [RIB3_YEAST]	20.19	5	1.01907	0.701135	0.781928
P04801	YIL078W	Ths1p	Threonyl-tRNA synthetase, cytoplasmic OS=Saccharomyces cerevisiae GN=THS1 PE=1 SV=2 - [SYTC_YEAST]	8.45	6	0.95887	0.705282	0.785512
P15646	YDL014W	Nop1p	rRNA 2'-O-methyltransferase fibrillarin OS=Saccharomyces cerevisiae GN=NOP1 PE=1 SV=1 - [FBRL_YEAST]	13.15	3	1.02787	0.708744	0.787782
Q12500	YLR114C	Avl9p	Late secretory pathway protein AVL9 OS=Saccharomyces cerevisiae GN=AVL9 PE=1 SV=1 - [AVL9_YEAST]	1.31	1	0.949269	0.70919	0.787782
Q08208	YOL041C	Nop12p	Nucleolar protein 12 OS=Saccharomyces cerevisiae GN=NOP12 PE=1 SV=1 - [NOP12_YEAST]	6.32	2	1.053	0.710331	0.788009
P22137	YGL206C	Chc1p	Clathrin heavy chain OS=Saccharomyces cerevisiae GN=CHC1 PE=1 SV=1 - [CLH_YEAST]	2.12	2	1.04254	0.712684	0.789579
P00830	YJR121W	Atp2p	ATP synthase subunit beta, mitochondrial OS=Saccharomyces cerevisiae GN=ATP2 PE=1 SV=2 - [ATPB_YEAST]	4.5	2	1.02756	0.718529	0.795008
P12612	YDR212W	Tcp1p	T-complex protein 1 subunit alpha OS=Saccharomyces cerevisiae GN=TCP1 PE=1 SV=2 - [TCPA_YEAST]	5.9	2	0.975384	0.719982	0.795571
O14467	YOR298C-A	Mbf1p	Multiprotein-bridging factor 1 OS=Saccharomyces cerevisiae GN=MBF1 PE=1 SV=2 - [MBF1_YEAST]	9.93	1	1.02931	0.725832	0.80021
P0C2H8	YDL075W	Rpl31Ap	60S ribosomal protein L31-A OS=Saccharomyces cerevisiae GN=RPL31A PE=1 SV=1 - [RL31A_YEAST]	23.01	5	1.01071	0.726081	0.80021
B3LTX4	YIL127C	Rrt14p	Regulator of rDNA transcription 14 OS=Saccharomyces cerevisiae (strain RM11-1a) GN=RRT14 PE=3 SV=1 - [RRT14_YEAS1]	6.31	2	0.969131	0.733677	0.807086
P38079	YBR054W	Yro2p	Protein YRO2 OS=Saccharomyces cerevisiae GN=YRO2 PE=1 SV=1 - [YRO2_YEAST]	9.01	3	0.962779	0.734237	0.807086
Q07657	YDL225W	Shs1p	Seventh homolog of septin 1 OS=Saccharomyces cerevisiae GN=SHS1 PE=1 SV=1 - [SHS1_YEAST]	2.9	1	1.17185	0.744327	0.816887
Q05785	YLR206W	Ent2p	Epsin-2 OS=Saccharomyces cerevisiae GN=ENT2 PE=1 SV=1 - [ENT2_YEAST]	2.77	1	0.94985	0.746508	0.816887
Q05584	YDR272W	Glo2p	Hydroxyacylglutathione hydrolase, cytoplasmic isozyme OS=Saccharomyces cerevisiae GN=GLO2 PE=1 SV=1 - [GLO2_YEAST]	4.74	1	1.01579	0.747587	0.816887
Q06505	YPR133C	Spn1p	Transcription factor SPN1 OS=Saccharomyces cerevisiae GN=SPN1 PE=1 SV=1 - [IWS1_YEAST]	3.66	2	1.0292	0.748449	0.816887
P35996	YKL170W	Mrpl38p	54S ribosomal protein L38, mitochondrial OS=Saccharomyces cerevisiae GN=MRPL38 PE=1 SV=1 - [RM38_YEAST]	7.97	1	0.914351	0.748808	0.816887
P17076	YHL033C	Rpl8Ap	60S ribosomal protein L8-A OS=Saccharomyces cerevisiae GN=RPL8A PE=1 SV=4 - [RL8A_YEAST]	38.67	9	0.963878	0.748975	0.816887
Q05946	YLR222C	Utp13p	U3 small nucleolar RNA-associated protein 13 OS=Saccharomyces cerevisiae GN=UTP13 PE=1 SV=1 - [UTP13_YEAST]	1.22	1	0.955221	0.75016	0.817121
A6ZXP4	YDL084W	Sub2p	ATP-dependent RNA helicase SUB2 OS=Saccharomyces cerevisiae (strain YJM789) GN=SUB2 PE=3 SV=1 - [SUB2_YEAS7]	12.56	4	1.03831	0.751784	0.817205
P25694	YDL126C	Cdc48p	Cell division control protein 48 OS=Saccharomyces cerevisiae GN=CDC48 PE=1 SV=3 - [CDC48_YEAST]	4.91	5	0.98285	0.752178	0.817205
P40341	YMR089C	Yta12p	Mitochondrial respiratory chain complexes assembly protein YTA12 OS=Saccharomyces cerevisiae GN=YTA12 PE=1 SV=2 - [YTA12_YEAST]	1.33	1	1.07404	0.75816	0.822642
Q99312	YOR155C	Isn1p	IMP-specific 5'-nucleotidase 1 OS=Saccharomyces cerevisiae GN=ISN1 PE=1 SV=1 - [ISN1_YEAST]	2.67	1	1.05509	0.763648	0.827532
P08417	YPL262W	Fum1p	Fumarate hydratase, mitochondrial OS=Saccharomyces cerevisiae GN=FUM1 PE=1 SV=2 - [FUMH_YEAST]	1.64	1	1.04046	0.767086	0.829221
P32327	YBR218C	Pyc2p	Pyruvate carboxylase 2 OS=Saccharomyces cerevisiae GN=PYC2 PE=1 SV=2 - [PYC2_YEAST]	7.97	6	0.954736	0.767177	0.829221
Q04894	YMR318C	Adh6p	NADP-dependent alcohol dehydrogenase 6 OS=Saccharomyces cerevisiae GN=ADH6 PE=1 SV=1 - [ADH6_YEAST]	11.39	3	0.965407	0.768769	0.829877
Q07825	YLL029W	Fra1p	Putative Xaa-Pro aminopeptidase FRA1 OS=Saccharomyces cerevisiae GN=FRA1 PE=1 SV=1 - [FRA1_YEAST]	2.14	1	0.966431	0.771183	0.831416
Q99369	YOR280C	Fsh3p	Family of serine hydrolases 3 OS=Saccharomyces cerevisiae GN=FSH3 PE=1 SV=1 - [FSH3_YEAST]	4.89	1	0.954395	0.774702	0.834142
P22202	YER103W	Ssa4p	Heat shock protein SSA4 OS=Saccharomyces cerevisiae GN=SSA4 PE=1 SV=3 - [HSP74_YEAST]	7.48	5	1.03091	0.779134	0.837843
P06103	YOR361C	Prt1p	Eukaryotic translation initiation factor 3 subunit B OS=Saccharomyces cerevisiae GN=PRT1 PE=1 SV=1 - [EIF3B_YEAST]	7.73	5	0.984568	0.799514	0.858662
P05756	YDR064W	Rps13p	40S ribosomal protein S13 OS=Saccharomyces cerevisiae GN=RPS13 PE=1 SV=3 - [RS13_YEAST]	18.54	3	1.02003	0.801048	0.859213
P36049	YKL172W	Ebp2p	rRNA-processing protein EBP2 OS=Saccharomyces cerevisiae GN=EBP2 PE=1 SV=1 - [EBP2_YEAST]	4.92	1	1.02958	0.803162	0.859858
B3LSS7	YHR163W	Sol3p	6-phosphogluconolactonase 3 OS=Saccharomyces cerevisiae (strain RM11-1a) GN=SOL3 PE=3 SV=1 - [SOL3_YEAS1]	8.84	1	1.41743	0.803692	0.859858
P47075	YJL012C	Vtc4p	Vacuolar transporter chaperone 4 OS=Saccharomyces cerevisiae GN=VTC4 PE=1 SV=2 - [VTC4_YEAST]	3.33	2	0.986029	0.807285	0.862607
P24280	YMR079W	Sec14p	SEC14 cytosolic factor OS=Saccharomyces cerevisiae GN=SEC14 PE=1 SV=3 - [SEC14_YEAST]	21.05	4	1.01394	0.811161	0.86565
P32895	YKL181W	Prs1p	Ribose-phosphate pyrophosphokinase 1 OS=Saccharomyces cerevisiae GN=PRS1 PE=1 SV=1 - [KPR1_YEAST]	2.34	1	0.969329	0.813087	0.866607
Q02753	YBR191W	Rpl21Ap	60S ribosomal protein L21-A OS=Saccharomyces cerevisiae GN=RPL21A PE=1 SV=1 - [RL21A_YEAST]	16.88	3	1.01434	0.818833	0.870129
P39744	YOR206W	Noc2p	Nucleolar complex protein 2 OS=Saccharomyces cerevisiae GN=NOC2 PE=1 SV=2 - [NOC2_YEAST]	2.11	1	0.967314	0.81928	0.870129
P12611	YOR043W	Whi2p	Growth regulation protein OS=Saccharomyces cerevisiae GN=WHI2 PE=1 SV=2 - [WHI2_YEAST]	2.47	1	0.985122	0.819492	0.870129
P25375	YCL57W	Prd1p	Saccharolysin OS=Saccharomyces cerevisiae GN=PRD1 PE=1 SV=1 - [PRTD_YEAST]	5.9	3	1.04139	0.821758	0.870565
P53914	YNL132W	Kre33p	UPF0202 protein KRE33 OS=Saccharomyces cerevisiae GN=KRE33 PE=1 SV=1 - [KRE33_YEAST]	1.33	1	0.940105	0.82197	0.870565
P39533	YJL200C	Aco2p	Probable aconitate hydratase 2 OS=Saccharomyces cerevisiae GN=ACO2 PE=1 SV=1 - [ACON2_YEAST]	4.94	2	1.1364	0.823921	0.871535
P18562	YHR128W	Fur1p	Uracil phosphoribosyltransferase OS=Saccharomyces cerevisiae GN=FUR1 PE=1 SV=2 - [UPP_YEAST]	10.19	2	0.978402	0.82693	0.873205
P36015	YKL196C	Ykt6p	Synaptobrevin homolog YKT6 OS=Saccharomyces cerevisiae GN=YKT6 PE=1 SV=1 - [YKT6_YEAST]	7.5	1	0.967377	0.827574	0.873205
P08524	YJL167W	Erg20p	Farnesyl pyrophosphate synthase OS=Saccharomyces cerevisiae GN=ERG20 PE=1 SV=2 - [FPPS_YEAST]	4.55	2	0.983052	0.831915	0.87649
P38845	YHR146W	Yhr146Wp	Uncharacterized protein YHR146W OS=Saccharomyces cerevisiae GN=YHR146W PE=1 SV=1 - [YHU6_YEAST]	6.88	2	1.00953	0.832959	0.87649
Q03148	YMR096W	Snz1p	Pyridoxine biosynthesis protein SNZ1 OS=Saccharomyces cerevisiae GN=SNZ1 PE=1 SV=1 - [SNZ1_YEAST]	3.37	1	1.01101	0.833811	0.87649
P38250	YBR086C	Ist2p	Increased sodium tolerance protein 2 OS=Saccharomyces cerevisiae GN=IST2 PE=1 SV=2 - [IST2_YEAST]	3.49	2	1.03291	0.836797	0.878532
P07274	YOR122C	Pfy1p	Profilin OS=Saccharomyces cerevisiae GN=PFY1 PE=1 SV=2 - [PROF_YEAST]	24.6	2	1.01674	0.83956	0.880335
P38886	YHR200W	Rpn10p	26S proteasome regulatory subunit RPN10 OS=Saccharomyces cerevisiae GN=RPN10 PE=1 SV=3 - [RPN10_YEAST]	7.46	1	0.920015	0.843555	0.883424
Q3E764	YLR262C-A	Tma7p	Translation machinery-associated protein 7 OS=Saccharomyces cerevisiae GN=TMA7 PE=1 SV=1 - [TMA7_YEAST]	23.44	1	0.974207	0.84896	0.887961
Q12109	YOL097C	Wrs1p	Tryptophanyl-tRNA synthetase, cytoplasmic OS=Saccharomyces cerevisiae GN=WRS1 PE=1 SV=1 - [SYWC_YEAST]	6.02	2	0.986094	0.850912	0.887961
P07262	YOR375C	Gdh1p	NADP-specific glutamate dehydrogenase 1 OS=Saccharomyces cerevisiae GN=GDH1 PE=1 SV=2 - [DHE4_YEAST]	18.06	6	1.01399	0.851051	0.887961
Q06506	YPR137W	Rrp9p	Ribosomal RNA-processing protein 9 OS=Saccharomyces cerevisiae GN=RRP9 PE=1 SV=1 - [RRP9_YEAST]	1.75	1	0.986792	0.852121	0.887977
A6ZRW3	YNL121C	Tom70p	Mitochondrial import receptor subunit TOM70 OS=Saccharomyces cerevisiae (strain YJM789) GN=TOM70 PE=3 SV=1 - [TOM70_YEAS7]	1.94	1	1.05646	0.853327	0.888135
P39078	YDL143W	Cct4p	T-complex protein 1 subunit delta OS=Saccharomyces cerevisiae GN=CCT4 PE=1 SV=2 - [TCPD_YEAST]	2.27	1	1.25525	0.858374	0.892285
P43123	YDL103C	Qri1p	UDP-N-acetylglucosamine pyrophosphorylase OS=Saccharomyces cerevisiae GN=QRI1 PE=1 SV=1 - [UAP1_YEAST]	3.35	1	0.970163	0.862806	0.895786
P32449	YBR249C	Aro4p	Phospho-2-dehydro-3-deoxyheptonate aldolase, tyrosine-inhibited OS=Saccharomyces cerevisiae GN=ARO4 PE=1 SV=2 - [AROG_YEAST]	15.14	4	1.01198	0.865207	0.897173
A6ZQE4	YJL192C	Sop4p	Protein SOP4 OS=Saccharomyces cerevisiae (strain YJM789) GN=SOP4 PE=3 SV=1 - [SOP4_YEAS7]	5.13	1	0.987713	0.870421	0.901469
P40510	YIL074C	Ser33p	D-3-phosphoglycerate dehydrogenase 2 OS=Saccharomyces cerevisiae GN=SER33 PE=1 SV=1 - [SER33_YEAST]	10.45	4	1.01294	0.874911	0.904871
P53981	YNL010W	Ynl010Wp	Uncharacterized phosphatase YNL010W OS=Saccharomyces cerevisiae GN=YNL010W PE=1 SV=1 - [YNB0_YEAST]	7.05	2	0.978044	0.875855	0.904871
P53598	YOR142W	Lsc1p	Succinyl-CoA ligase [ADP-forming] subunit alpha, mitochondrial OS=Saccharomyces cerevisiae GN=LSC1 PE=1 SV=1 - [SUCA_YEAST]	10.64	2	1.01496	0.883752	0.909805
A6ZQJ1	YKR059W	Tif1p	ATP-dependent RNA helicase eIF4A OS=Saccharomyces cerevisiae (strain YJM789) GN=TIF1 PE=3 SV=1 - [IF4A_YEAS7]	16.71	5	1.00865	0.883984	0.909805
P19524	YOR326W	Myo2p	Myosin-2 OS=Saccharomyces cerevisiae GN=MYO2 PE=1 SV=1 - [MYO2_YEAST]	1.08	1	0.977067	0.884295	0.909805
P11433	YAL041W	Cdc24p	Cell division control protein 24 OS=Saccharomyces cerevisiae GN=CDC24 PE=1 SV=2 - [CDC24_YEAST]	1.52	1	0.978778	0.884953	0.909805
P20435	YPR187W	Rpo26p	DNA-directed RNA polymerases I, II, and III subunit RPABC2 OS=Saccharomyces cerevisiae GN=RPO26 PE=1 SV=1 - [RPAB2_YEAST]	12.9	1	1.01681	0.89124	0.913988
P40579	YIR035C	Yir035Cp	Uncharacterized oxidoreductase YIR035C OS=Saccharomyces cerevisiae GN=YIR035C PE=1 SV=1 - [YIV5_YEAST]	5.91	1	0.99487	0.891682	0.913988
P40165	YNL200C	Ynl200Cp	Uncharacterized protein YNL200C OS=Saccharomyces cerevisiae GN=YNL200C PE=1 SV=1 - [YNU0_YEAST]	4.47	1	0.987617	0.89276	0.913988
P38013	YLR109W	Ahp1p	Peroxiredoxin type-2 OS=Saccharomyces cerevisiae GN=AHP1 PE=1 SV=4 - [AHP1_YEAST]	23.86	4	1.02713	0.893363	0.913988
P25443	YGL123W	Rps2p	40S ribosomal protein S2 OS=Saccharomyces cerevisiae GN=RPS2 PE=1 SV=3 - [RS2_YEAST]	15.35	4	0.991072	0.895073	0.914626
P21826	YIR031C	Dal7p	Malate synthase 2, glyoxysomal OS=Saccharomyces cerevisiae GN=DAL7 PE=1 SV=2 - [MASZ_YEAST]	6.68	3	0.996384	0.903671	0.922293
P16387	YER178W	Pda1p	Pyruvate dehydrogenase E1 component subunit alpha, mitochondrial OS=Saccharomyces cerevisiae GN=PDA1 PE=1 SV=2 - [ODPA_YEAST]	8.81	5	0.996243	0.910669	0.928309
P22211	YNL183C	Npr1p	Nitrogen permease reactivator protein OS=Saccharomyces cerevisiae GN=NPR1 PE=1 SV=2 - [NPR1_YEAST]	4.18	2	1.00679	0.914768	0.93136
P04046	YMR300C	Ade4p	Amidophosphoribosyltransferase OS=Saccharomyces cerevisiae GN=ADE4 PE=1 SV=2 - [PUR1_YEAST]	8.04	4	1.00568	0.91682	0.931415
P05739	YLR448W	Rpl6Bp	60S ribosomal protein L6-B OS=Saccharomyces cerevisiae GN=RPL6B PE=1 SV=4 - [RL6B_YEAST]	15.34	2	0.991212	0.917034	0.931415
P12683	YML075C	Hmg1p	3-hydroxy-3-methylglutaryl-coenzyme A reductase 1 OS=Saccharomyces cerevisiae GN=HMG1 PE=1 SV=1 - [HMDH1_YEAST]	1.14	1	0.98996	0.928873	0.941883
P11154	YGL062W	Pyc1p	Pyruvate carboxylase 1 OS=Saccharomyces cerevisiae GN=PYC1 PE=1 SV=2 - [PYC1_YEAST]	8.4	7	0.974531	0.929578	0.941883
P27466	YFR014C	Cmk1p	Calcium/calmodulin-dependent protein kinase I OS=Saccharomyces cerevisiae GN=CMK1 PE=1 SV=2 - [KCC1_YEAST]	2.24	1	1.00496	0.950232	0.960263
P23644	YMR203W	Tom40p	Mitochondrial import receptor subunit TOM40 OS=Saccharomyces cerevisiae GN=TOM40 PE=1 SV=1 - [TOM40_YEAST]	5.68	1	0.98668	0.950558	0.960263
P32419	YDL078C	Mdh3p	Malate dehydrogenase, peroxisomal OS=Saccharomyces cerevisiae GN=MDH3 PE=1 SV=3 - [MDHP_YEAST]	4.66	2	0.990445	0.95114	0.960263
A6ZP47	YOR204W	Ded1p	ATP-dependent RNA helicase DED1 OS=Saccharomyces cerevisiae (strain YJM789) GN=DED1 PE=3 SV=1 - [DED1_YEAS7]	2.32	1	0.992668	0.952338	0.960322
P03965	YJR109C	Cpa2p	Carbamoyl-phosphate synthase arginine-specific large chain OS=Saccharomyces cerevisiae GN=CPA2 PE=1 SV=1 - [CARB_YEAST]	2.95	3	1.00478	0.966557	0.973494
P47169	YJR137C	Ecm17p	Sulfite reductase [NADPH] subunit beta OS=Saccharomyces cerevisiae GN=ECM17 PE=1 SV=1 - [ECM17_YEAST]	8.39	12	0.999187	0.978776	0.984623
P46971	YJR143C	Pmt4p	Dolichyl-phosphate-mannose--protein mannosyltransferase 4 OS=Saccharomyces cerevisiae GN=PMT4 PE=1 SV=1 - [PMT4_YEAST]	3.28	2	0.995001	0.980858	0.98554
P25303	YMR214W	Scj1p	DnaJ-related protein SCJ1 OS=Saccharomyces cerevisiae GN=SCJ1 PE=1 SV=2 - [SCJ1_YEAST]	7.43	2	1.00182	0.982694	0.986208
Q00711	YKL148C	Sdh1p	Succinate dehydrogenase [ubiquinone] flavoprotein subunit, mitochondrial OS=Saccharomyces cerevisiae GN=SDH1 PE=1 SV=1 - [DHSA_YEAST]	3.91	1	1.00622	0.99296	0.994261
P39935	YGR162W	Tif4631p	Eukaryotic initiation factor 4F subunit p150 OS=Saccharomyces cerevisiae GN=TIF4631 PE=1 SV=2 - [IF4F1_YEAST]	3.15	3	1.00139	0.99308	0.994261
P09232	YEL060C	Prb1p	Cerevisin OS=Saccharomyces cerevisiae GN=PRB1 PE=1 SV=1 - [PRTB_YEAST]	6.77	4	0.999299	0.997603	0.997603
